# Supplementary material for: Epigenetic age acceleration is related to cognition and cognitive decline in the Elderly: Results of the Austrian Stroke Prevention Study
Source: bioRxiv or medRxiv preprint supplement (doi:10.1101/2023.11.21.23298753), 2023-11-22
Supplement: Supplementary file [file media-1.pdf]

**Supplementary Table 1: Intraclass correlations among six technical replicates**

| Intraclass correlation  | Type        | Epigenetic Age   | EWAS tools  |               |               |             | Minfi Noob  |               |               |             |
|-------------------------|-------------|------------------|-------------|---------------|---------------|-------------|-------------|---------------|---------------|-------------|
|                         |             |                  | ICC         | p value       | lower         | upper       | ICC         | p value       | lower         | upper       |
| Single_raters_absolute  | ICC1        | Horvath          | 0.95        | 0.0002        | 0.74          | 0.99        | 0.92        | 0.0006        | 0.61          | 0.99        |
| Single_random_raters    | <b>ICC2</b> | <b>Horvath</b>   | <b>0.95</b> | <b>0.0005</b> | <b>0.74</b>   | <b>0.99</b> | <b>0.92</b> | <b>0.0016</b> | <b>0.61</b>   | <b>0.99</b> |
| Single_fixed_raters     | ICC3        | Horvath          | 0.95        | 0.0005        | 0.7           | 0.99        | 0.92        | 0.0016        | 0.55          | 0.99        |
| Average_raters_absolute | ICC1k       | Horvath          | 0.98        | 0.0002        | 0.85          | 1           | 0.96        | 0.0006        | 0.76          | 0.99        |
| Average_random_raters   | ICC2k       | Horvath          | 0.98        | 0.0005        | 0.85          | 1           | 0.96        | 0.0016        | 0.76          | 0.99        |
| Average_fixed_raters    | ICC3k       | Horvath          | 0.98        | 0.0005        | 0.82          | 1           | 0.96        | 0.0016        | 0.71          | 0.99        |
| Single_raters_absolute  | ICC1        | PCHorvath        | 0.96        | 6E-05         | 0.81          | 0.99        | 0.97        | 5E-05         | 0.81          | 1           |
| Single_random_raters    | <b>ICC2</b> | <b>PCHorvath</b> | <b>0.96</b> | <b>0.0002</b> | <b>0.81</b>   | <b>0.99</b> | <b>0.97</b> | <b>0.0002</b> | <b>0.81</b>   | <b>1</b>    |
| Single_fixed_raters     | ICC3        | PCHorvath        | 0.96        | 0.0002        | 0.77          | 1           | 0.97        | 0.0002        | 0.79          | 1           |
| Average_raters_absolute | ICC1k       | PCHorvath        | 0.98        | 6E-05         | 0.89          | 1           | 0.98        | 5E-05         | 0.9           | 1           |
| Average_random_raters   | ICC2k       | PCHorvath        | 0.98        | 0.0002        | 0.89          | 1           | 0.98        | 0.0002        | 0.9           | 1           |
| Average_fixed_raters    | ICC3k       | PCHorvath        | 0.98        | 0.0002        | 0.87          | 1           | 0.98        | 0.0002        | 0.88          | 1           |
| Single_raters_absolute  | ICC1        | Hannum           | 0.62        | 0.052         | -0.163        | 0.94        | 0.62        | 0.051         | -0.16         | 0.94        |
| Single_random_raters    | <b>ICC2</b> | <b>Hannum</b>    | <b>0.64</b> | <b>0.043</b>  | <b>-0.068</b> | <b>0.94</b> | <b>0.64</b> | <b>0.037</b>  | <b>-0.061</b> | <b>0.94</b> |
| Single_fixed_raters     | ICC3        | Hannum           | 0.69        | 0.043         | -0.136        | 0.95        | 0.71        | 0.037         | -0.094        | 0.95        |
| Average_raters_absolute | ICC1k       | Hannum           | 0.77        | 0.052         | -0.39         | 0.97        | 0.77        | 0.051         | -0.382        | 0.97        |
| Average_random_raters   | ICC2k       | Hannum           | 0.78        | 0.043         | -0.145        | 0.97        | 0.78        | 0.037         | -0.129        | 0.97        |
| Average_fixed_raters    | ICC3k       | Hannum           | 0.82        | 0.043         | -0.314        | 0.97        | 0.83        | 0.037         | -0.207        | 0.98        |
| Single_raters_absolute  | ICC1        | PCHannum         | 0.92        | 0.0008        | 0.58          | 0.99        | 0.90        | 0.0012        | 0.53          | 0.99        |
| Single_random_raters    | <b>ICC2</b> | <b>PCHannum</b>  | <b>0.92</b> | <b>0.0019</b> | <b>0.58</b>   | <b>0.99</b> | <b>0.90</b> | <b>0.0027</b> | <b>0.53</b>   | <b>0.99</b> |
| Single_fixed_raters     | ICC3        | PCHannum         | 0.92        | 0.0019        | 0.52          | 0.99        | 0.90        | 0.0027        | 0.47          | 0.99        |
| Average_raters_absolute | ICC1k       | PCHannum         | 0.96        | 0.0008        | 0.74          | 0.99        | 0.95        | 0.0012        | 0.7           | 0.99        |
| Average_random_raters   | ICC2k       | PCHannum         | 0.96        | 0.0019        | 0.74          | 0.99        | 0.95        | 0.0027        | 0.69          | 0.99        |
| Average_fixed_raters    | ICC3k       | PCHannum         | 0.96        | 0.0019        | 0.69          | 0.99        | 0.95        | 0.0027        | 0.64          | 0.99        |
| Single_raters_absolute  | ICC1        | Zhang ENP        | 0.88        | 0.0024        | 0.44          | 0.98        | 0.87        | 0.0028        | 0.41          | 0.98        |
| Single_random_raters    | <b>ICC2</b> | <b>Zhang ENP</b> | <b>0.88</b> | <b>0.0048</b> | <b>0.44</b>   | <b>0.98</b> | <b>0.87</b> | <b>0.0056</b> | <b>0.41</b>   | <b>0.98</b> |
| Single_fixed_raters     | ICC3        | Zhang ENP        | 0.88        | 0.0048        | 0.36          | 0.98        | 0.87        | 0.0056        | 0.33          | 0.98        |
| Average_raters_absolute | ICC1k       | Zhang ENP        | 0.93        | 0.0024        | 0.61          | 0.99        | 0.93        | 0.0028        | 0.58          | 0.99        |

|                         |             |                   |             |               |             |             |             |               |             |             |
|-------------------------|-------------|-------------------|-------------|---------------|-------------|-------------|-------------|---------------|-------------|-------------|
| Average_random_raters   | ICC2k       | Zhang ENP         | 0.93        | 0.0048        | 0.61        | 0.99        | 0.93        | 0.0056        | 0.58        | 0.99        |
| Average_fixed_raters    | ICC3k       | Zhang ENP         | 0.93        | 0.0048        | 0.53        | 0.99        | 0.93        | 0.0056        | 0.5         | 0.99        |
| Single_raters_absolute  | ICC1        | Zhang BLUP        | 0.94        | 0.0003        | 0.68        | 0.99        | 0.94        | 0.0002        | 0.7         | 0.99        |
| Single_random_raters    | <b>ICC2</b> | <b>Zhang BLUP</b> | <b>0.94</b> | <b>0.0009</b> | <b>0.68</b> | <b>0.99</b> | <b>0.94</b> | <b>0.0007</b> | <b>0.7</b>  | <b>0.99</b> |
| Single_fixed_raters     | ICC3        | Zhang BLUP        | 0.94        | 0.0009        | 0.63        | 0.99        | 0.94        | 0.0007        | 0.65        | 0.99        |
| Average_raters_absolute | ICC1k       | Zhang BLUP        | 0.97        | 0.0003        | 0.81        | 1           | 0.97        | 0.0002        | 0.83        | 1           |
| Average_random_raters   | ICC2k       | Zhang BLUP        | 0.97        | 0.0009        | 0.81        | 1           | 0.97        | 0.0007        | 0.83        | 1           |
| Average_fixed_raters    | ICC3k       | Zhang BLUP        | 0.97        | 0.0009        | 0.77        | 1           | 0.97        | 0.0007        | 0.79        | 1           |
| Single_raters_absolute  | ICC1        | Pheno             | 0.78        | 0.0119        | 0.15        | 0.97        | 0.78        | 0.0119        | 0.15        | 0.97        |
| Single_random_raters    | <b>ICC2</b> | <b>Pheno</b>      | <b>0.79</b> | <b>0.0079</b> | <b>0.12</b> | <b>0.97</b> | <b>0.79</b> | <b>0.0079</b> | <b>0.12</b> | <b>0.97</b> |
| Single_fixed_raters     | ICC3        | Pheno             | 0.85        | 0.0079        | 0.26        | 0.98        | 0.85        | 0.0079        | 0.26        | 0.98        |
| Average_raters_absolute | ICC1k       | Pheno             | 0.88        | 0.0119        | 0.27        | 0.98        | 0.88        | 0.0119        | 0.27        | 0.98        |
| Average_random_raters   | ICC2k       | Pheno             | 0.88        | 0.0079        | 0.21        | 0.98        | 0.88        | 0.0079        | 0.21        | 0.98        |
| Average_fixed_raters    | ICC3k       | Pheno             | 0.92        | 0.0079        | 0.41        | 0.99        | 0.92        | 0.0079        | 0.41        | 0.99        |
| Single_raters_absolute  | ICC1        | PCPheno           | 0.92        | 0.0006        | 0.62        | 0.99        | 0.91        | 0.0009        | 0.56        | 0.99        |
| Single_random_raters    | <b>ICC2</b> | <b>PCPheno</b>    | <b>0.92</b> | <b>0.0015</b> | <b>0.62</b> | <b>0.99</b> | <b>0.91</b> | <b>0.0022</b> | <b>0.56</b> | <b>0.99</b> |
| Single_fixed_raters     | ICC3        | PCPheno           | 0.92        | 0.0015        | 0.56        | 0.99        | 0.91        | 0.0022        | 0.5         | 0.99        |
| Average_raters_absolute | ICC1k       | PCPheno           | 0.96        | 0.0006        | 0.76        | 0.99        | 0.95        | 0.0009        | 0.72        | 0.99        |
| Average_random_raters   | ICC2k       | PCPheno           | 0.96        | 0.0015        | 0.76        | 0.99        | 0.95        | 0.0022        | 0.72        | 0.99        |
| Average_fixed_raters    | ICC3k       | PCPheno           | 0.96        | 0.0015        | 0.72        | 0.99        | 0.95        | 0.0022        | 0.66        | 0.99        |
| Single_raters_absolute  | ICC1        | Grim              | 0.90        | 0.0012        | 0.53        | 0.99        | 0.95        | 0.0001        | 0.75        | 0.99        |
| Single_random_raters    | <b>ICC2</b> | <b>Grim</b>       | <b>0.90</b> | <b>0.0027</b> | <b>0.53</b> | <b>0.99</b> | <b>0.95</b> | <b>0.0003</b> | <b>0.73</b> | <b>0.99</b> |
| Single_fixed_raters     | ICC3        | Grim              | 0.90        | 0.0027        | 0.46        | 0.99        | 0.96        | 0.0003        | 0.75        | 0.99        |
| Average_raters_absolute | ICC1k       | Grim              | 0.95        | 0.0012        | 0.69        | 0.99        | 0.98        | 0.0001        | 0.86        | 1           |
| Average_random_raters   | ICC2k       | Grim              | 0.95        | 0.0027        | 0.69        | 0.99        | 0.98        | 0.0003        | 0.85        | 1           |
| Average_fixed_raters    | ICC3k       | Grim              | 0.95        | 0.0027        | 0.63        | 0.99        | 0.98        | 0.0003        | 0.86        | 1           |
| Single_raters_absolute  | ICC1        | PCGrim            | 1           | 5E-08         | 0.98        | 1           | 1           | 2E-08         | 0.98        | 1           |
| Single_random_raters    | <b>ICC2</b> | <b>PCGrim</b>     | <b>1</b>    | <b>8E-08</b>  | <b>0.92</b> | <b>1</b>    | <b>1</b>    | <b>2E-07</b>  | <b>0.98</b> | <b>1</b>    |
| Single_fixed_raters     | ICC3        | PCGrim            | 1           | 8E-08         | 0.99        | 1           | 1           | 2E-07         | 0.98        | 1           |
| Average_raters_absolute | ICC1k       | PCGrim            | 1           | 5E-08         | 0.99        | 1           | 1           | 2E-08         | 0.99        | 1           |
| Average_random_raters   | ICC2k       | PCGrim            | 1           | 8E-08         | 0.96        | 1           | 1           | 2E-07         | 0.99        | 1           |

|                         |             |                    |             |               |             |             |             |               |             |             |
|-------------------------|-------------|--------------------|-------------|---------------|-------------|-------------|-------------|---------------|-------------|-------------|
| Average_fixed_raters    | ICC3k       | PCGrim             | 1           | 8E-08         | 0.99        | 1           | 1           | 2E-07         | 0.99        | 1           |
| Single_raters_absolute  | ICC1        | DunedinPACE        | 0.89        | 0.0018        | 0.47        | 0.98        | 0.84        | 0.0045        | 0.33        | 0.98        |
| Single_random_raters    | <b>ICC2</b> | <b>DunedinPACE</b> | <b>0.89</b> | <b>0.0027</b> | <b>0.47</b> | <b>0.98</b> | <b>0.84</b> | <b>0.0084</b> | <b>0.33</b> | <b>0.98</b> |
| Single_fixed_raters     | ICC3        | DunedinPACE        | 0.9         | 0.0027        | 0.46        | 0.99        | 0.84        | 0.0084        | 0.25        | 0.98        |
| Average_raters_absolute | ICC1k       | DunedinPACE        | 0.94        | 0.0018        | 0.64        | 0.99        | 0.92        | 0.0045        | 0.5         | 0.99        |
| Average_random_raters   | ICC2k       | DunedinPACE        | 0.94        | 0.0027        | 0.64        | 0.99        | 0.92        | 0.0084        | 0.5         | 0.99        |
| Average_fixed_raters    | ICC3k       | DunedinPACE        | 0.95        | 0.0027        | 0.63        | 0.99        | 0.92        | 0.0084        | 0.4         | 0.99        |

**Supplementary Table 2: Correlations between epigenetic age and age acceleration**

|               | age_BL | Horvath | PCHorvath | Hannum | PCHannum | Zhang-ENP | Zhang-BLUP | Pheno | PCPheno | Grim | PCGrim | DunedinPACE | Horvath_AA | PCHorvath_AA | Hannum_AA | EEAA  | IEAA  | Zhang-ENP_AA | Zhang-BLUP_AA | Pheno_AA | PCPheno_AA | Grim_AA | PCGrim_AA | DunedinPACE_AA |
|---------------|--------|---------|-----------|--------|----------|-----------|------------|-------|---------|------|--------|-------------|------------|--------------|-----------|-------|-------|--------------|---------------|----------|------------|---------|-----------|----------------|
| age_BL        | 1      | 0.64    | 0.62      | 0.71   | 0.66     | 0.82      | 0.83       | 0.62  | 0.7     | 0.81 | 0.89   | 0.18        | 0          | 0            | 0         | -0.01 | -0.02 | 0            | 0             | 0        | 0          | 0       | 0         | 0              |
| Horvath       | 0.64   | 1       | 0.84      | 0.81   | 0.85     | 0.81      | 0.81       | 0.76  | 0.8     | 0.62 | 0.67   | 0.29        | 0.76       | 0.56         | 0.51      | 0.48  | 0.72  | 0.49         | 0.5           | 0.46     | 0.48       | 0.16    | 0.2       | 0.18           |
| PCHorvath     | 0.62   | 0.84    | 1         | 0.82   | 0.96     | 0.81      | 0.8        | 0.74  | 0.9     | 0.65 | 0.71   | 0.36        | 0.57       | 0.78         | 0.54      | 0.52  | 0.5   | 0.52         | 0.51          | 0.45     | 0.62       | 0.25    | 0.34      | 0.25           |
| Hannum        | 0.71   | 0.81    | 0.82      | 1      | 0.89     | 0.9       | 0.87       | 0.74  | 0.8     | 0.68 | 0.74   | 0.31        | 0.46       | 0.48         | 0.7       | 0.67  | 0.39  | 0.54         | 0.5           | 0.39     | 0.48       | 0.18    | 0.23      | 0.19           |
| PCHannum      | 0.66   | 0.85    | 0.96      | 0.89   | 1        | 0.85      | 0.85       | 0.75  | 0.9     | 0.67 | 0.73   | 0.36        | 0.55       | 0.7          | 0.59      | 0.58  | 0.47  | 0.53         | 0.55          | 0.43     | 0.61       | 0.23    | 0.31      | 0.24           |
| Zhang-ENP     | 0.82   | 0.81    | 0.81      | 0.9    | 0.85     | 1         | 0.94       | 0.77  | 0.9     | 0.73 | 0.79   | 0.25        | 0.37       | 0.39         | 0.45      | 0.42  | 0.33  | 0.58         | 0.47          | 0.33     | 0.39       | 0.13    | 0.14      | 0.1            |
| Zhnag-BLUP    | 0.83   | 0.81    | 0.8       | 0.87   | 0.85     | 0.94      | 1          | 0.75  | 0.8     | 0.74 | 0.8    | 0.25        | 0.36       | 0.36         | 0.39      | 0.36  | 0.33  | 0.45         | 0.55          | 0.31     | 0.36       | 0.11    | 0.12      | 0.1            |
| Pheno         | 0.62   | 0.76    | 0.74      | 0.74   | 0.75     | 0.77      | 0.75       | 1     | 0.8     | 0.68 | 0.69   | 0.41        | 0.48       | 0.45         | 0.43      | 0.42  | 0.43  | 0.45         | 0.43          | 0.79     | 0.51       | 0.31    | 0.31      | 0.31           |
| PCPheno       | 0.7    | 0.79    | 0.88      | 0.84   | 0.9      | 0.85      | 0.84       | 0.8   | 1       | 0.73 | 0.79   | 0.43        | 0.45       | 0.57         | 0.49      | 0.5   | 0.38  | 0.48         | 0.47          | 0.47     | 0.71       | 0.28    | 0.37      | 0.31           |
| Grim          | 0.81   | 0.62    | 0.65      | 0.68   | 0.67     | 0.73      | 0.74       | 0.68  | 0.7     | 1    | 0.94   | 0.5         | 0.13       | 0.19         | 0.15      | 0.15  | 0.09  | 0.13         | 0.12          | 0.23     | 0.23       | 0.59    | 0.48      | 0.36           |
| PCGrim        | 0.89   | 0.67    | 0.71      | 0.74   | 0.73     | 0.79      | 0.8        | 0.69  | 0.8     | 0.94 | 1      | 0.44        | 0.12       | 0.2          | 0.15      | 0.15  | 0.09  | 0.11         | 0.1           | 0.18     | 0.24       | 0.37    | 0.46      | 0.28           |
| DunedinPACE   | 0.18   | 0.29    | 0.36      | 0.31   | 0.36     | 0.25      | 0.25       | 0.41  | 0.4     | 0.5  | 0.44   | 1           | 0.23       | 0.31         | 0.26      | 0.29  | 0.18  | 0.18         | 0.18          | 0.38     | 0.43       | 0.59    | 0.6       | 0.98           |
| Horvath_AA    | 0      | 0.76    | 0.57      | 0.46   | 0.55     | 0.37      | 0.36       | 0.48  | 0.5     | 0.13 | 0.12   | 0.23        | 1          | 0.73         | 0.66      | 0.63  | 0.95  | 0.64         | 0.65          | 0.61     | 0.63       | 0.21    | 0.27      | 0.23           |
| PCHorvath_AA  | 0      | 0.56    | 0.78      | 0.48   | 0.7      | 0.39      | 0.36       | 0.45  | 0.6     | 0.19 | 0.2    | 0.31        | 0.73       | 1            | 0.69      | 0.67  | 0.65  | 0.67         | 0.66          | 0.57     | 0.8        | 0.32    | 0.43      | 0.31           |
| Hannum_AA     | 0      | 0.51    | 0.54      | 0.7    | 0.59     | 0.45      | 0.39       | 0.43  | 0.5     | 0.15 | 0.15   | 0.26        | 0.66       | 0.69         | 1         | 0.97  | 0.58  | 0.77         | 0.71          | 0.55     | 0.69       | 0.26    | 0.32      | 0.27           |
| EEAA          | 0.0    | 0.48    | 0.52      | 0.67   | 0.58     | 0.42      | 0.36       | 0.42  | 0.5     | 0.15 | 0.15   | 0.29        | 0.63       | 0.67         | 0.97      | 1     | 0.52  | 0.74         | 0.67          | 0.55     | 0.71       | 0.27    | 0.35      | 0.3            |
| IEAA          | 0.0    | 0.72    | 0.5       | 0.39   | 0.47     | 0.33      | 0.33       | 0.43  | 0.4     | 0.09 | 0.09   | 0.18        | 0.95       | 0.65         | 0.58      | 0.52  | 1     | 0.61         | 0.62          | 0.57     | 0.56       | 0.18    | 0.24      | 0.19           |
| Zhang-ENP_AA  | 0      | 0.49    | 0.52      | 0.54   | 0.53     | 0.58      | 0.45       | 0.45  | 0.5     | 0.13 | 0.11   | 0.18        | 0.64       | 0.67         | 0.77      | 0.74  | 0.61  | 1            | 0.81          | 0.58     | 0.67       | 0.22    | 0.25      | 0.18           |
| Zhang-BLUP_AA | 0      | 0.5     | 0.51      | 0.5    | 0.55     | 0.47      | 0.55       | 0.43  | 0.5     | 0.12 | 0.1    | 0.18        | 0.65       | 0.66         | 0.71      | 0.67  | 0.62  | 0.81         | 1             | 0.55     | 0.65       | 0.2     | 0.23      | 0.18           |
| Pheno_AA      | 0      | 0.46    | 0.45      | 0.39   | 0.43     | 0.33      | 0.31       | 0.79  | 0.5     | 0.23 | 0.18   | 0.38        | 0.61       | 0.57         | 0.55      | 0.55  | 0.57  | 0.58         | 0.55          | 1        | 0.65       | 0.4     | 0.4       | 0.39           |

|                    |   |      |      |      |      |      |      |      |     |      |      |      |      |      |      |      |      |      |      |      |      |      |      |      |
|--------------------|---|------|------|------|------|------|------|------|-----|------|------|------|------|------|------|------|------|------|------|------|------|------|------|------|
| PCPheno_AA         | 0 | 0.48 | 0.62 | 0.48 | 0.61 | 0.39 | 0.36 | 0.51 | 0.7 | 0.23 | 0.24 | 0.43 | 0.63 | 0.8  | 0.69 | 0.71 | 0.56 | 0.67 | 0.65 | 0.65 | 1    | 0.39 | 0.52 | 0.43 |
| Grim_AA            | 0 | 0.16 | 0.25 | 0.18 | 0.23 | 0.13 | 0.11 | 0.31 | 0.3 | 0.59 | 0.37 | 0.59 | 0.21 | 0.32 | 0.26 | 0.27 | 0.18 | 0.22 | 0.2  | 0.4  | 0.39 | 1    | 0.81 | 0.6  |
| PCGrim_AA          | 0 | 0.2  | 0.34 | 0.23 | 0.31 | 0.14 | 0.12 | 0.31 | 0.4 | 0.48 | 0.46 | 0.6  | 0.27 | 0.43 | 0.32 | 0.35 | 0.24 | 0.25 | 0.23 | 0.4  | 0.52 | 0.81 | 1    | 0.61 |
| DunedinPACE_A<br>A | 0 | 0.18 | 0.25 | 0.19 | 0.24 | 0.1  | 0.1  | 0.31 | 0.3 | 0.36 | 0.28 | 0.98 | 0.23 | 0.31 | 0.27 | 0.3  | 0.19 | 0.18 | 0.18 | 0.39 | 0.43 | 0.6  | 0.61 | 1    |

**Supplementary Table 3: Cross-sectional associations of epigenetic age acceleration with cognition**

| PHENO | PREDICTOR   | MODEL 1 |       |                |              |                |                  | MODEL 2 |       |                |              |                |                  |
|-------|-------------|---------|-------|----------------|--------------|----------------|------------------|---------|-------|----------------|--------------|----------------|------------------|
|       |             | Beta    | SE    | <i>p value</i> | <i>p adj</i> | <i>part R2</i> | <i>R2:Model1</i> | Beta    | SE    | <i>p value</i> | <i>p adj</i> | <i>part R2</i> | <i>R2:Model2</i> |
| MMSE  | Horvath     | 0.01    | 0.011 | 0.165          | 0.32         | 0.25%          | 13.87%           | 0.02    | 0.011 | 0.099          | 0.24         | 0.37%          | 16.03%           |
| MMSE  | PCHorvath   | 0.03    | 0.012 | 0.026          | 0.12         | 0.61%          | 14.20%           | 0.03    | 0.012 | 0.014          | 0.08         | 0.74%          | 16.42%           |
| MMSE  | Hannum      | 0.03    | 0.012 | 0.009          | 0.06         | 0.86%          | 14.40%           | 0.04    | 0.013 | 0.004          | 0.04         | 1.02%          | 16.67%           |
| MMSE  | PCHannum    | 0.02    | 0.012 | 0.116          | 0.27         | 0.33%          | 13.93%           | 0.02    | 0.013 | 0.074          | 0.21         | 0.41%          | 16.09%           |
| MMSE  | EEAA        | 0.02    | 0.010 | 0.032          | 0.13         | 0.63%          | 14.16%           | 0.03    | 0.011 | 0.016          | 0.09         | 0.77%          | 16.39%           |
| MMSE  | IEAA        | 0.02    | 0.011 | 0.150          | 0.30         | 0.26%          | 13.89%           | 0.02    | 0.011 | 0.102          | 0.24         | 0.35%          | 16.02%           |
| MMSE  | ENP         | 0.05    | 0.014 | 0.001          | 0.01         | 1.35%          | 14.91%           | 0.06    | 0.015 | 0.000          | 0.00         | 1.79%          | 17.50%           |
| MMSE  | BLUP        | 0.04    | 0.015 | 0.003          | 0.03         | 1.02%          | 14.61%           | 0.04    | 0.015 | 0.006          | 0.05         | 0.88%          | 16.59%           |
| MMSE  | Pheno       | 0.01    | 0.009 | 0.147          | 0.30         | 0.26%          | 13.89%           | 0.01    | 0.009 | 0.144          | 0.30         | 0.26%          | 15.96%           |
| MMSE  | PCPheno     | 0.03    | 0.011 | 0.019          | 0.10         | 0.67%          | 14.26%           | 0.03    | 0.012 | 0.020          | 0.10         | 0.67%          | 16.34%           |
| MMSE  | Grim        | 0.01    | 0.015 | 0.612          | 0.72         | 0.04%          | 13.68%           | 0.02    | 0.017 | 0.197          | 0.38         | 0.16%          | 15.91%           |
| MMSE  | PCGrim      | 0.01    | 0.020 | 0.692          | 0.76         | 0.02%          | 13.67%           | 0.03    | 0.024 | 0.229          | 0.39         | 0.16%          | 15.88%           |
| MMSE  | DunedinPACE | 0.63    | 0.515 | 0.219          | 0.35         | 0.22%          | 13.82%           | 0.71    | 0.567 | 0.209          | 0.39         | 0.18%          | 15.90%           |
| MDRS  | Horvath     | -0.02   | 0.023 | 0.351          | 0.48         | 0.10%          | 27.55%           | -0.01   | 0.023 | 0.516          | 0.64         | 0.05%          | 28.39%           |
| MDRS  | PCHorvath   | 0.04    | 0.025 | 0.122          | 0.28         | 0.19%          | 27.69%           | 0.03    | 0.026 | 0.258          | 0.41         | 0.12%          | 28.47%           |
| MDRS  | Hannum      | 0.02    | 0.026 | 0.378          | 0.51         | 0.07%          | 27.54%           | 0.03    | 0.027 | 0.297          | 0.42         | 0.09%          | 28.46%           |
| MDRS  | PCHannum    | 0.04    | 0.026 | 0.105          | 0.26         | 0.20%          | 27.71%           | 0.04    | 0.027 | 0.170          | 0.34         | 0.15%          | 28.53%           |
| MDRS  | EEAA        | 0.02    | 0.022 | 0.328          | 0.46         | 0.08%          | 27.56%           | 0.02    | 0.023 | 0.335          | 0.46         | 0.07%          | 28.44%           |
| MDRS  | IEAA        | -0.03   | 0.024 | 0.168          | 0.32         | 0.20%          | 27.65%           | -0.03   | 0.024 | 0.280          | 0.41         | 0.13%          | 28.46%           |
| MDRS  | ENP         | 0.03    | 0.030 | 0.285          | 0.42         | 0.10%          | 27.58%           | 0.05    | 0.032 | 0.125          | 0.28         | 0.20%          | 28.58%           |
| MDRS  | BLUP        | 0.03    | 0.031 | 0.297          | 0.43         | 0.09%          | 27.57%           | 0.03    | 0.033 | 0.291          | 0.42         | 0.09%          | 28.46%           |
| MDRS  | Pheno       | 0.01    | 0.019 | 0.505          | 0.63         | 0.04%          | 27.51%           | 0.02    | 0.020 | 0.281          | 0.41         | 0.10%          | 28.46%           |
| MDRS  | PCPheno     | 0.02    | 0.024 | 0.384          | 0.51         | 0.06%          | 27.54%           | 0.01    | 0.024 | 0.719          | 0.80         | 0.01%          | 28.36%           |
| MDRS  | Grim        | 0.03    | 0.031 | 0.342          | 0.48         | 0.07%          | 27.55%           | 0.03    | 0.036 | 0.447          | 0.57         | 0.05%          | 28.40%           |

|      |             |        |        |       |      |       |        |        |        |       |      |       |        |
|------|-------------|--------|--------|-------|------|-------|--------|--------|--------|-------|------|-------|--------|
| MDRS | PCGrim      | -0.01  | 0.043  | 0.878 | 0.91 | 0.00% | 27.47% | -0.02  | 0.050  | 0.630 | 0.72 | 0.03% | 28.37% |
| MDRS | DunedinPACE | 0.30   | 1.101  | 0.786 | 0.82 | 0.01% | 27.48% | -0.58  | 1.194  | 0.626 | 0.72 | 0.03% | 28.37% |
| TMT  | Horvath     | -0.10  | 0.363  | 0.773 | 0.82 | 0.01% | 24.67% | 0.04   | 0.362  | 0.920 | 0.94 | 0.00% | 25.6%  |
| TMT  | PCHorvath   | 0.01   | 0.409  | 0.974 | 0.98 | 0.00% | 24.66% | 0.08   | 0.420  | 0.852 | 0.89 | 0.00% | 25.6%  |
| TMT  | Hannum      | -0.27  | 0.422  | 0.516 | 0.63 | 0.05% | 24.71% | -0.12  | 0.433  | 0.786 | 0.84 | 0.01% | 25.6%  |
| TMT  | PCHannum    | -0.21  | 0.416  | 0.610 | 0.72 | 0.03% | 24.69% | -0.13  | 0.425  | 0.752 | 0.82 | 0.01% | 25.6%  |
| TMT  | EEAA        | -0.31  | 0.347  | 0.368 | 0.50 | 0.11% | 24.74% | -0.21  | 0.356  | 0.561 | 0.68 | 0.05% | 25.6%  |
| TMT  | IEAA        | 0.00   | 0.381  | 0.993 | 0.99 | 0.00% | 24.66% | 0.11   | 0.381  | 0.778 | 0.84 | 0.01% | 25.6%  |
| TMT  | ENP         | 0.34   | 0.491  | 0.489 | 0.62 | 0.04% | 24.71% | 0.55   | 0.503  | 0.273 | 0.41 | 0.11% | 25.7%  |
| TMT  | BLUP        | 0.02   | 0.509  | 0.963 | 0.98 | 0.00% | 24.66% | 0.12   | 0.516  | 0.812 | 0.86 | 0.01% | 25.6%  |
| TMT  | Pheno       | -0.11  | 0.308  | 0.722 | 0.78 | 0.01% | 24.68% | 0.04   | 0.315  | 0.901 | 0.92 | 0.00% | 25.6%  |
| TMT  | PCPheno     | -0.10  | 0.380  | 0.787 | 0.82 | 0.01% | 24.67% | -0.03  | 0.386  | 0.946 | 0.95 | 0.00% | 25.6%  |
| TMT  | Grim        | -0.61  | 0.491  | 0.213 | 0.35 | 0.21% | 24.82% | -0.31  | 0.570  | 0.581 | 0.69 | 0.05% | 25.6%  |
| TMT  | PCGrim      | -1.22  | 0.684  | 0.074 | 0.22 | 0.44% | 24.98% | -0.87  | 0.787  | 0.267 | 0.41 | 0.22% | 25.7%  |
| TMT  | DunedinPACE | -40.54 | 17.247 | 0.019 | 0.10 | 0.70% | 25.20% | -32.50 | 18.912 | 0.086 | 0.23 | 0.51% | 25.9%  |
| WCST | Horvath     | -0.09  | 0.052  | 0.087 | 0.23 | 0.45% | 1.88%  | -0.10  | 0.053  | 0.060 | 0.19 | 0.57% | 2.91%  |
| WCST | PCHorvath   | -0.20  | 0.060  | 0.001 | 0.01 | 1.59% | 2.87%  | -0.24  | 0.062  | 0.000 | 0.00 | 2.11% | 4.36%  |
| WCST | Hannum      | -0.20  | 0.061  | 0.001 | 0.01 | 1.52% | 2.94%  | -0.20  | 0.063  | 0.002 | 0.02 | 1.51% | 3.78%  |
| WCST | PCHannum    | -0.22  | 0.060  | 0.000 | 0.00 | 1.99% | 3.28%  | -0.25  | 0.062  | 0.000 | 0.00 | 2.36% | 4.60%  |
| WCST | EEAA        | -0.18  | 0.050  | 0.000 | 0.00 | 1.80% | 3.23%  | -0.17  | 0.051  | 0.001 | 0.01 | 1.78% | 4.00%  |
| WCST | IEAA        | -0.06  | 0.055  | 0.261 | 0.39 | 0.20% | 1.66%  | -0.08  | 0.055  | 0.172 | 0.34 | 0.30% | 2.68%  |
| WCST | ENP         | -0.29  | 0.070  | 0.000 | 0.00 | 2.21% | 3.62%  | -0.31  | 0.072  | 0.000 | 0.00 | 2.53% | 4.84%  |
| WCST | BLUP        | -0.27  | 0.072  | 0.000 | 0.00 | 1.89% | 3.32%  | -0.31  | 0.074  | 0.000 | 0.00 | 2.32% | 4.75%  |
| WCST | Pheno       | -0.11  | 0.044  | 0.010 | 0.06 | 1.03% | 2.37%  | -0.12  | 0.046  | 0.011 | 0.07 | 1.12% | 3.32%  |
| WCST | PCPheno     | -0.25  | 0.056  | 0.000 | 0.00 | 2.75% | 3.96%  | -0.25  | 0.057  | 0.000 | 0.00 | 2.97% | 5.05%  |
| WCST | Grim        | -0.14  | 0.071  | 0.049 | 0.16 | 0.62% | 2.00%  | -0.17  | 0.083  | 0.038 | 0.15 | 0.59% | 3.01%  |
| WCST | PCGrim      | -0.15  | 0.099  | 0.135 | 0.29 | 0.38% | 1.79%  | -0.18  | 0.115  | 0.109 | 0.26 | 0.37% | 2.77%  |

|              |             |       |       |       |      |       |        |       |       |       |      |       |        |
|--------------|-------------|-------|-------|-------|------|-------|--------|-------|-------|-------|------|-------|--------|
| WCST         | DunedinPACE | -5.97 | 2.476 | 0.016 | 0.09 | 0.92% | 2.25%  | -6.56 | 2.724 | 0.016 | 0.09 | 0.95% | 3.21%  |
| PPT RLB      | Horvath     | 0.07  | 0.034 | 0.049 | 0.16 | 0.29% | 35.50% | 0.09  | 0.035 | 0.013 | 0.08 | 0.47% | 37.00% |
| PPT RLB      | PCHorvath   | 0.07  | 0.039 | 0.066 | 0.20 | 0.25% | 35.46% | 0.09  | 0.040 | 0.025 | 0.11 | 0.38% | 36.90% |
| PPT RLB      | Hannum      | 0.04  | 0.040 | 0.326 | 0.46 | 0.08% | 35.25% | 0.07  | 0.042 | 0.091 | 0.24 | 0.22% | 36.71% |
| PPT RLB      | PCHannum    | 0.06  | 0.040 | 0.164 | 0.32 | 0.14% | 35.33% | 0.08  | 0.041 | 0.063 | 0.19 | 0.26% | 36.76% |
| PPT RLB      | EEAA        | 0.04  | 0.033 | 0.268 | 0.40 | 0.10% | 35.27% | 0.06  | 0.034 | 0.099 | 0.24 | 0.21% | 36.70% |
| PPT RLB      | IEAA        | 0.05  | 0.036 | 0.139 | 0.30 | 0.17% | 35.36% | 0.07  | 0.037 | 0.043 | 0.15 | 0.33% | 36.82% |
| PPT RLB      | ENP         | 0.13  | 0.047 | 0.007 | 0.06 | 0.54% | 35.78% | 0.17  | 0.048 | 0.001 | 0.01 | 0.87% | 37.49% |
| PPT RLB      | BLUP        | 0.08  | 0.048 | 0.116 | 0.27 | 0.20% | 35.38% | 0.11  | 0.050 | 0.028 | 0.11 | 0.38% | 36.89% |
| PPT RLB      | Pheno       | 0.05  | 0.029 | 0.094 | 0.24 | 0.20% | 35.41% | 0.08  | 0.030 | 0.010 | 0.07 | 0.45% | 37.05% |
| PPT RLB      | PCPheno     | 0.06  | 0.036 | 0.083 | 0.23 | 0.22% | 35.42% | 0.07  | 0.037 | 0.045 | 0.15 | 0.29% | 36.81% |
| PPT RLB      | Grim        | -0.06 | 0.047 | 0.225 | 0.35 | 0.16% | 35.29% | 0.04  | 0.055 | 0.469 | 0.59 | 0.05% | 36.50% |
| PPT RLB      | PCGrim      | -0.08 | 0.065 | 0.193 | 0.35 | 0.21% | 35.31% | 0.03  | 0.076 | 0.684 | 0.77 | 0.02% | 36.47% |
| PPT RLB      | DunedinPACE | -2.22 | 1.648 | 0.179 | 0.33 | 0.21% | 35.32% | -0.89 | 1.832 | 0.627 | 0.72 | 0.03% | 36.47% |
| PPT Assembly | Horvath     | 0.02  | 0.038 | 0.514 | 0.63 | 0.03% | 34.85% | 0.04  | 0.038 | 0.310 | 0.44 | 0.08% | 36.32% |
| PPT Assembly | PCHorvath   | 0.02  | 0.043 | 0.680 | 0.76 | 0.01% | 34.83% | 0.03  | 0.044 | 0.451 | 0.57 | 0.04% | 36.27% |
| PPT Assembly | Hannum      | 0.02  | 0.044 | 0.696 | 0.76 | 0.01% | 34.83% | 0.05  | 0.046 | 0.266 | 0.41 | 0.09% | 36.33% |
| PPT Assembly | PCHannum    | 0.02  | 0.043 | 0.618 | 0.72 | 0.02% | 34.84% | 0.04  | 0.045 | 0.333 | 0.46 | 0.07% | 36.31% |
| PPT Assembly | EEAA        | 0.02  | 0.036 | 0.679 | 0.76 | 0.01% | 34.83% | 0.04  | 0.038 | 0.333 | 0.46 | 0.07% | 36.31% |
| PPT Assembly | IEAA        | 0.01  | 0.040 | 0.772 | 0.82 | 0.01% | 34.82% | 0.02  | 0.040 | 0.583 | 0.69 | 0.03% | 36.25% |
| PPT Assembly | ENP         | 0.09  | 0.051 | 0.097 | 0.25 | 0.21% | 35.05% | 0.12  | 0.053 | 0.025 | 0.11 | 0.36% | 36.68% |
| PPT Assembly | BLUP        | 0.07  | 0.053 | 0.220 | 0.35 | 0.12% | 34.94% | 0.09  | 0.054 | 0.100 | 0.24 | 0.21% | 36.47% |
| PPT Assembly | Pheno       | 0.02  | 0.032 | 0.499 | 0.63 | 0.04% | 34.85% | 0.05  | 0.033 | 0.115 | 0.26 | 0.17% | 36.45% |
| PPT Assembly | PCPheno     | 0.02  | 0.040 | 0.684 | 0.76 | 0.01% | 34.83% | 0.03  | 0.041 | 0.449 | 0.57 | 0.04% | 36.27% |
| PPT Assembly | Grim        | -0.06 | 0.051 | 0.222 | 0.35 | 0.18% | 34.94% | 0.06  | 0.060 | 0.357 | 0.48 | 0.07% | 36.30% |
| PPT Assembly | PCGrim      | -0.11 | 0.071 | 0.120 | 0.28 | 0.33% | 35.02% | 0.01  | 0.083 | 0.882 | 0.91 | 0.00% | 36.22% |
| PPT Assembly | DunedinPACE | -4.73 | 1.803 | 0.009 | 0.06 | 0.88% | 35.40% | -2.95 | 2.004 | 0.141 | 0.30 | 0.52% | 36.42% |



|       |             |        |        |       |      |       |        |        |        |       |      |       |        |
|-------|-------------|--------|--------|-------|------|-------|--------|--------|--------|-------|------|-------|--------|
| VSM   | Horvath     | -0.29  | 0.228  | 0.208 | 0.35 | 0.21% | 22.52% | -0.26  | 0.232  | 0.264 | 0.41 | 0.18% | 24.20% |
| VSM   | PCHorvath   | -0.37  | 0.255  | 0.144 | 0.30 | 0.29% | 22.58% | -0.31  | 0.267  | 0.248 | 0.40 | 0.21% | 24.21% |
| VSM   | Hannum      | -0.60  | 0.271  | 0.027 | 0.12 | 0.60% | 22.87% | -0.52  | 0.278  | 0.063 | 0.19 | 0.48% | 24.44% |
| VSM   | PCHannum    | -0.43  | 0.262  | 0.100 | 0.25 | 0.36% | 22.64% | -0.34  | 0.272  | 0.211 | 0.39 | 0.25% | 24.23% |
| VSM   | EEAA        | -0.50  | 0.223  | 0.024 | 0.11 | 0.63% | 22.89% | -0.44  | 0.228  | 0.057 | 0.19 | 0.51% | 24.46% |
| VSM   | IEAA        | -0.33  | 0.239  | 0.171 | 0.32 | 0.23% | 22.55% | -0.30  | 0.243  | 0.221 | 0.39 | 0.20% | 24.22% |
| VSM   | ENP         | -0.62  | 0.312  | 0.048 | 0.16 | 0.47% | 22.77% | -0.59  | 0.321  | 0.064 | 0.19 | 0.41% | 24.44% |
| VSM   | BLUP        | -0.69  | 0.323  | 0.033 | 0.13 | 0.53% | 22.83% | -0.68  | 0.329  | 0.040 | 0.15 | 0.52% | 24.52% |
| VSM   | Pheno       | -0.23  | 0.195  | 0.249 | 0.38 | 0.18% | 22.49% | -0.13  | 0.201  | 0.528 | 0.64 | 0.06% | 24.10% |
| VSM   | PCPheno     | -0.56  | 0.240  | 0.020 | 0.10 | 0.69% | 22.93% | -0.50  | 0.247  | 0.043 | 0.15 | 0.62% | 24.51% |
| VSM   | Grim        | -0.84  | 0.308  | 0.007 | 0.06 | 0.92% | 23.13% | -0.43  | 0.364  | 0.237 | 0.39 | 0.44% | 24.21% |
| VSM   | PCGrim      | -1.16  | 0.433  | 0.007 | 0.06 | 0.90% | 23.11% | -0.61  | 0.509  | 0.229 | 0.39 | 0.48% | 24.22% |
| VSM   | DunedinPACE | -42.22 | 10.983 | 0.000 | 0.00 | 1.75% | 23.90% | -34.23 | 12.255 | 0.005 | 0.04 | 1.56% | 24.92% |
| VRM   | Horvath     | -0.14  | 0.174  | 0.428 | 0.55 | 0.07% | 29.32% | -0.12  | 0.178  | 0.483 | 0.60 | 0.06% | 31.14% |
| VRM   | PCHorvath   | -0.25  | 0.195  | 0.197 | 0.35 | 0.18% | 29.42% | -0.25  | 0.205  | 0.231 | 0.39 | 0.19% | 31.24% |
| VRM   | Hannum      | -0.36  | 0.207  | 0.085 | 0.23 | 0.31% | 29.54% | -0.27  | 0.214  | 0.203 | 0.39 | 0.22% | 31.26% |
| VRM   | PCHannum    | -0.25  | 0.200  | 0.206 | 0.35 | 0.18% | 29.41% | -0.23  | 0.209  | 0.279 | 0.41 | 0.16% | 31.21% |
| VRM   | EEAA        | -0.34  | 0.170  | 0.043 | 0.16 | 0.41% | 29.65% | -0.27  | 0.176  | 0.125 | 0.28 | 0.30% | 31.33% |
| VRM   | IEAA        | -0.16  | 0.182  | 0.394 | 0.51 | 0.08% | 29.32% | -0.15  | 0.187  | 0.417 | 0.55 | 0.08% | 31.16% |
| VRM   | ENP         | -0.42  | 0.237  | 0.080 | 0.23 | 0.32% | 29.55% | -0.29  | 0.246  | 0.233 | 0.39 | 0.21% | 31.24% |
| VRM   | BLUP        | -0.38  | 0.246  | 0.128 | 0.28 | 0.24% | 29.48% | -0.31  | 0.253  | 0.215 | 0.39 | 0.20% | 31.25% |
| VRM   | Pheno       | 0.01   | 0.149  | 0.943 | 0.97 | 0.00% | 29.25% | 0.04   | 0.155  | 0.778 | 0.84 | 0.01% | 31.10% |
| VRM   | PCPheno     | -0.34  | 0.183  | 0.061 | 0.19 | 0.37% | 29.60% | -0.33  | 0.189  | 0.080 | 0.22 | 0.37% | 31.40% |
| VRM   | Grim        | -0.14  | 0.235  | 0.557 | 0.66 | 0.04% | 29.29% | -0.10  | 0.280  | 0.732 | 0.81 | 0.01% | 31.11% |
| VRM   | PCGrim      | -0.47  | 0.330  | 0.159 | 0.31 | 0.22% | 29.45% | -0.56  | 0.391  | 0.153 | 0.31 | 0.23% | 31.30% |
| VRM   | DunedinPACE | -5.33  | 8.442  | 0.528 | 0.64 | 0.05% | 29.29% | -4.08  | 9.459  | 0.666 | 0.76 | 0.02% | 31.11% |
| Speed | Horvath     | 0.98   | 0.772  | 0.205 | 0.35 | 0.18% | 21.39% | 1.38   | 0.791  | 0.082 | 0.22 | 0.33% | 23.25% |

|       |             |        |        |       |      |       |        |        |        |       |      |       |        |
|-------|-------------|--------|--------|-------|------|-------|--------|--------|--------|-------|------|-------|--------|
| Speed | PCHorvath   | 2.10   | 0.864  | 0.015 | 0.09 | 0.70% | 21.86% | 2.44   | 0.901  | 0.007 | 0.05 | 0.82% | 23.73% |
| Speed | Hannum      | 1.80   | 0.902  | 0.046 | 0.16 | 0.51% | 21.65% | 2.07   | 0.933  | 0.027 | 0.11 | 0.59% | 23.46% |
| Speed | PCHannum    | 1.77   | 0.881  | 0.045 | 0.16 | 0.48% | 21.65% | 2.11   | 0.915  | 0.021 | 0.10 | 0.59% | 23.51% |
| Speed | EEAA        | 1.43   | 0.740  | 0.053 | 0.17 | 0.50% | 21.62% | 1.69   | 0.768  | 0.028 | 0.11 | 0.60% | 23.45% |
| Speed | IEAA        | 0.92   | 0.812  | 0.258 | 0.39 | 0.14% | 21.36% | 1.23   | 0.831  | 0.139 | 0.30 | 0.25% | 23.15% |
| Speed | ENP         | 3.17   | 1.046  | 0.003 | 0.03 | 1.13% | 22.20% | 3.56   | 1.082  | 0.001 | 0.01 | 1.24% | 24.11% |
| Speed | BLUP        | 3.10   | 1.077  | 0.004 | 0.04 | 0.98% | 22.11% | 3.55   | 1.110  | 0.001 | 0.02 | 1.13% | 24.05% |
| Speed | Pheno       | 1.38   | 0.654  | 0.035 | 0.13 | 0.50% | 21.70% | 1.41   | 0.675  | 0.038 | 0.15 | 0.46% | 23.39% |
| Speed | PCPheno     | 2.02   | 0.797  | 0.011 | 0.07 | 0.76% | 21.91% | 2.34   | 0.826  | 0.005 | 0.04 | 0.90% | 23.81% |
| Speed | Grim        | 0.50   | 1.037  | 0.630 | 0.72 | 0.03% | 21.24% | 0.06   | 1.230  | 0.959 | 0.96 | 0.00% | 22.91% |
| Speed | PCGrim      | 1.23   | 1.444  | 0.395 | 0.51 | 0.09% | 21.30% | 1.49   | 1.694  | 0.381 | 0.51 | 0.12% | 22.99% |
| Speed | DunedinPACE | -46.60 | 36.450 | 0.202 | 0.35 | 0.19% | 21.40% | -49.52 | 40.992 | 0.227 | 0.39 | 0.20% | 23.07% |

**Supplementary Table 4: Longitudinal associations of epigenetic age acceleration with cognition**

| PHENO       | PREDICTOR   | MODEL 1 |       |                |              |                |                  | MODEL 2 |       |                |              |                |                  |
|-------------|-------------|---------|-------|----------------|--------------|----------------|------------------|---------|-------|----------------|--------------|----------------|------------------|
|             |             | Beta    | SE    | <i>p value</i> | <i>p adj</i> | <i>part R2</i> | <i>R2 Model1</i> | Beta    | SE    | <i>p value</i> | <i>p adj</i> | <i>part R2</i> | <i>R2 Model2</i> |
| MMSE change | Horvath     | 0.00    | 0.000 | 0.925          | 0.95         | 0.00%          | 7.10%            | 0.00    | 0.000 | 0.955          | 0.96         | 0.00%          | 7.54%            |
| MMSE change | PCHorvath   | 0.00    | 0.000 | 0.780          | 0.87         | 0.01%          | 7.11%            | 0.00    | 0.000 | 0.769          | 0.91         | 0.02%          | 7.56%            |
| MMSE change | Hannum      | 0.00    | 0.000 | 0.596          | 0.75         | 0.05%          | 7.15%            | 0.00    | 0.000 | 0.816          | 0.94         | 0.01%          | 7.55%            |
| MMSE change | PCHannum    | 0.00    | 0.000 | 0.612          | 0.75         | 0.04%          | 7.15%            | 0.00    | 0.000 | 0.653          | 0.84         | 0.04%          | 7.59%            |
| MMSE change | EEAA        | 0.00    | 0.000 | 0.616          | 0.75         | 0.04%          | 7.15%            | 0.00    | 0.000 | 0.823          | 0.94         | 0.01%          | 7.55%            |
| MMSE change | IEAA        | 0.00    | 0.000 | 0.817          | 0.90         | 0.01%          | 7.11%            | 0.00    | 0.000 | 0.895          | 0.94         | 0.00%          | 7.55%            |
| MMSE change | ENP         | 0.00    | 0.000 | 0.581          | 0.74         | 0.06%          | 7.16%            | 0.00    | 0.000 | 0.685          | 0.85         | 0.03%          | 7.58%            |
| MMSE change | BLUP        | 0.00    | 0.000 | 0.737          | 0.83         | 0.02%          | 7.12%            | 0.00    | 0.001 | 0.848          | 0.94         | 0.01%          | 7.55%            |
| MMSE change | Pheno       | 0.00    | 0.000 | 0.925          | 0.95         | 0.00%          | 7.10%            | 0.00    | 0.000 | 0.889          | 0.94         | 0.00%          | 7.55%            |
| MMSE change | PCPheno     | 0.00    | 0.000 | 0.482          | 0.66         | 0.12%          | 7.19%            | 0.00    | 0.000 | 0.545          | 0.74         | 0.09%          | 7.62%            |
| MMSE change | Grim        | 0.00    | 0.000 | 0.157          | 0.28         | 0.46%          | 7.48%            | 0.00    | 0.001 | 0.067          | 0.16         | 0.52%          | 8.23%            |
| MMSE change | PCGrim      | 0.00    | 0.001 | 0.416          | 0.59         | 0.18%          | 7.23%            | 0.00    | 0.001 | 0.222          | 0.37         | 0.26%          | 7.85%            |
| MMSE change | DunedinPACE | -0.01   | 0.017 | 0.516          | 0.69         | 0.11%          | 7.18%            | -0.02   | 0.019 | 0.363          | 0.54         | 0.13%          | 7.71%            |
| MDRS change | Horvath     | 0.00    | 0.002 | 0.579          | 0.74         | 0.06%          | 5.16%            | 0.00    | 0.002 | 0.338          | 0.51         | 0.14%          | 6.87%            |
| MDRS change | PCHorvath   | 0.00    | 0.002 | 0.929          | 0.95         | 0.00%          | 5.10%            | 0.00    | 0.002 | 0.768          | 0.91         | 0.02%          | 6.70%            |
| MDRS change | Hannum      | 0.00    | 0.002 | 0.903          | 0.95         | 0.00%          | 5.11%            | 0.00    | 0.002 | 0.633          | 0.82         | 0.04%          | 6.73%            |
| MDRS change | PCHannum    | 0.00    | 0.002 | 0.927          | 0.95         | 0.00%          | 5.10%            | 0.00    | 0.002 | 0.742          | 0.91         | 0.02%          | 6.70%            |
| MDRS change | EEAA        | 0.00    | 0.002 | 0.998          | 1.00         | 0.00%          | 5.10%            | 0.00    | 0.002 | 0.682          | 0.85         | 0.03%          | 6.72%            |
| MDRS change | IEAA        | 0.00    | 0.002 | 0.511          | 0.69         | 0.08%          | 5.19%            | 0.00    | 0.002 | 0.344          | 0.52         | 0.15%          | 6.87%            |
| MDRS change | ENP         | 0.00    | 0.002 | 0.485          | 0.66         | 0.10%          | 5.20%            | 0.00    | 0.002 | 0.766          | 0.91         | 0.03%          | 6.70%            |
| MDRS change | BLUP        | 0.00    | 0.002 | 0.412          | 0.59         | 0.14%          | 5.24%            | 0.00    | 0.003 | 0.621          | 0.82         | 0.07%          | 6.73%            |
| MDRS change | Pheno       | 0.00    | 0.001 | 0.630          | 0.75         | 0.05%          | 5.15%            | 0.00    | 0.002 | 0.877          | 0.94         | 0.01%          | 6.69%            |
| MDRS change | PCPheno     | 0.00    | 0.002 | 0.211          | 0.36         | 0.38%          | 5.41%            | 0.00    | 0.002 | 0.391          | 0.57         | 0.24%          | 6.83%            |

|             |             |       |       |       |      |       |       |       |       |       |      |       |       |
|-------------|-------------|-------|-------|-------|------|-------|-------|-------|-------|-------|------|-------|-------|
| MDRS change | Grim        | 0.00  | 0.002 | 0.413 | 0.59 | 0.17% | 5.24% | 0.00  | 0.003 | 0.280 | 0.46 | 0.25% | 6.92% |
| MDRS change | PCGrim      | 0.00  | 0.003 | 0.535 | 0.70 | 0.10% | 5.18% | 0.00  | 0.004 | 0.428 | 0.61 | 0.15% | 6.81% |
| MDRS change | DunedinPACE | -0.09 | 0.084 | 0.295 | 0.45 | 0.29% | 5.32% | -0.08 | 0.095 | 0.420 | 0.61 | 0.18% | 6.81% |
| TMT change  | Horvath     | 0.00  | 0.011 | 0.820 | 0.90 | 0.01% | 4.81% | 0.00  | 0.011 | 0.848 | 0.94 | 0.01% | 12.2% |
| TMT change  | PCHorvath   | -0.02 | 0.012 | 0.056 | 0.13 | 0.81% | 5.52% | -0.02 | 0.012 | 0.078 | 0.18 | 0.65% | 12.8% |
| TMT change  | Hannum      | -0.03 | 0.012 | 0.032 | 0.09 | 0.94% | 5.71% | -0.02 | 0.012 | 0.111 | 0.22 | 0.60% | 12.7% |
| TMT change  | PCHannum    | -0.03 | 0.012 | 0.013 | 0.04 | 1.31% | 6.02% | -0.02 | 0.012 | 0.041 | 0.12 | 0.96% | 13.1% |
| TMT change  | EEAA        | -0.02 | 0.010 | 0.022 | 0.06 | 1.06% | 5.84% | -0.02 | 0.010 | 0.076 | 0.18 | 0.78% | 12.9% |
| TMT change  | IEAA        | 0.00  | 0.011 | 0.872 | 0.93 | 0.01% | 4.80% | 0.00  | 0.011 | 0.908 | 0.95 | 0.00% | 12.2% |
| TMT change  | ENP         | -0.03 | 0.014 | 0.043 | 0.10 | 0.83% | 5.61% | -0.02 | 0.014 | 0.114 | 0.22 | 0.52% | 12.7% |
| TMT change  | BLUP        | -0.04 | 0.014 | 0.009 | 0.03 | 1.34% | 6.13% | -0.03 | 0.014 | 0.032 | 0.10 | 0.96% | 13.1% |
| TMT change  | Pheno       | -0.01 | 0.009 | 0.268 | 0.43 | 0.28% | 5.04% | -0.01 | 0.009 | 0.523 | 0.73 | 0.09% | 12.3% |
| TMT change  | PCPheno     | -0.03 | 0.010 | 0.002 | 0.01 | 2.03% | 6.69% | -0.03 | 0.010 | 0.010 | 0.05 | 1.56% | 13.5% |
| TMT change  | Grim        | -0.04 | 0.014 | 0.003 | 0.02 | 1.83% | 6.49% | -0.04 | 0.016 | 0.019 | 0.06 | 1.11% | 13.3% |
| TMT change  | PCGrim      | -0.06 | 0.019 | 0.001 | 0.01 | 2.07% | 6.82% | -0.05 | 0.022 | 0.012 | 0.05 | 1.34% | 13.5% |
| TMT change  | DunedinPACE | -1.37 | 0.494 | 0.006 | 0.03 | 1.69% | 6.29% | -1.06 | 0.541 | 0.051 | 0.13 | 0.97% | 13.0% |
| WCST change | Horvath     | 0.01  | 0.007 | 0.141 | 0.26 | 0.52% | 2.55% | 0.01  | 0.007 | 0.100 | 0.21 | 0.65% | 5.00% |
| WCST change | PCHorvath   | 0.02  | 0.007 | 0.003 | 0.02 | 1.97% | 3.89% | 0.03  | 0.007 | 0.001 | 0.01 | 2.58% | 6.85% |
| WCST change | Hannum      | 0.02  | 0.008 | 0.002 | 0.01 | 2.03% | 4.10% | 0.02  | 0.008 | 0.004 | 0.03 | 2.02% | 6.17% |
| WCST change | PCHannum    | 0.02  | 0.007 | 0.001 | 0.01 | 2.39% | 4.31% | 0.03  | 0.007 | 0.001 | 0.01 | 2.72% | 6.88% |
| WCST change | EEAA        | 0.02  | 0.006 | 0.001 | 0.01 | 2.39% | 4.48% | 0.02  | 0.006 | 0.003 | 0.02 | 2.32% | 6.33% |
| WCST change | IEAA        | 0.01  | 0.007 | 0.251 | 0.41 | 0.29% | 2.38% | 0.01  | 0.007 | 0.161 | 0.29 | 0.45% | 4.84% |
| WCST change | ENP         | 0.03  | 0.009 | 0.001 | 0.01 | 2.34% | 4.44% | 0.03  | 0.009 | 0.000 | 0.01 | 2.75% | 7.23% |
| WCST change | BLUP        | 0.03  | 0.009 | 0.001 | 0.01 | 2.26% | 4.37% | 0.03  | 0.009 | 0.000 | 0.01 | 2.77% | 7.28% |
| WCST change | Pheno       | 0.01  | 0.006 | 0.016 | 0.05 | 1.36% | 3.30% | 0.01  | 0.006 | 0.017 | 0.06 | 1.51% | 5.64% |
| WCST change | PCPheno     | 0.02  | 0.007 | 0.000 | 0.01 | 3.04% | 4.90% | 0.02  | 0.007 | 0.000 | 0.01 | 3.21% | 7.13% |
| WCST change | Grim        | 0.02  | 0.009 | 0.021 | 0.06 | 1.27% | 3.18% | 0.02  | 0.010 | 0.022 | 0.07 | 1.29% | 5.55% |

|                |             |      |       |       |      |       |       |      |       |       |      |       |        |
|----------------|-------------|------|-------|-------|------|-------|-------|------|-------|-------|------|-------|--------|
| WCST change    | PCGrim      | 0.02 | 0.012 | 0.065 | 0.14 | 0.87% | 2.80% | 0.02 | 0.014 | 0.103 | 0.21 | 0.81% | 4.99%  |
| WCST change    | DunedinPACE | 0.83 | 0.314 | 0.008 | 0.03 | 1.69% | 3.52% | 0.86 | 0.345 | 0.013 | 0.05 | 1.80% | 5.73%  |
| PPT RLB change | Horvath     | 0.00 | 0.001 | 0.099 | 0.20 | 0.47% | 5.72% | 0.00 | 0.001 | 0.064 | 0.16 | 0.57% | 10.36% |
| PPT RLB change | PCHorvath   | 0.00 | 0.001 | 0.078 | 0.16 | 0.53% | 5.80% | 0.00 | 0.001 | 0.073 | 0.17 | 0.59% | 10.32% |
| PPT RLB change | Hannum      | 0.00 | 0.001 | 0.132 | 0.25 | 0.40% | 5.63% | 0.00 | 0.001 | 0.125 | 0.24 | 0.42% | 10.15% |
| PPT RLB change | PCHannum    | 0.00 | 0.001 | 0.110 | 0.22 | 0.44% | 5.69% | 0.00 | 0.001 | 0.099 | 0.21 | 0.47% | 10.22% |
| PPT RLB change | EEAA        | 0.00 | 0.001 | 0.077 | 0.16 | 0.54% | 5.80% | 0.00 | 0.001 | 0.093 | 0.20 | 0.49% | 10.24% |
| PPT RLB change | IEAA        | 0.00 | 0.001 | 0.155 | 0.28 | 0.35% | 5.58% | 0.00 | 0.001 | 0.084 | 0.18 | 0.51% | 10.27% |
| PPT RLB change | ENP         | 0.00 | 0.002 | 0.007 | 0.03 | 1.33% | 6.64% | 0.00 | 0.002 | 0.007 | 0.04 | 1.37% | 11.15% |
| PPT RLB change | BLUP        | 0.00 | 0.002 | 0.306 | 0.46 | 0.21% | 5.39% | 0.00 | 0.002 | 0.126 | 0.24 | 0.41% | 10.14% |
| PPT RLB change | Pheno       | 0.00 | 0.001 | 0.268 | 0.43 | 0.21% | 5.42% | 0.00 | 0.001 | 0.199 | 0.34 | 0.30% | 10.00% |
| PPT RLB change | PCPheno     | 0.00 | 0.001 | 0.067 | 0.15 | 0.58% | 5.85% | 0.00 | 0.001 | 0.047 | 0.13 | 0.64% | 10.46% |
| PPT RLB change | Grim        | 0.00 | 0.002 | 0.271 | 0.43 | 0.32% | 5.42% | 0.00 | 0.002 | 0.936 | 0.95 | 0.00% | 9.67%  |
| PPT RLB change | PCGrim      | 0.00 | 0.002 | 0.713 | 0.83 | 0.03% | 5.21% | 0.00 | 0.002 | 0.336 | 0.51 | 0.20% | 9.86%  |
| PPT RLB change | DunedinPACE | 0.03 | 0.056 | 0.632 | 0.75 | 0.06% | 5.23% | 0.01 | 0.062 | 0.894 | 0.94 | 0.00% | 9.67%  |
| PPT AS change  | Horvath     | 0.00 | 0.000 | 0.356 | 0.53 | 0.16% | 3.27% | 0.00 | 0.000 | 0.286 | 0.46 | 0.22% | 6.81%  |
| PPT AS change  | PCHorvath   | 0.00 | 0.000 | 0.835 | 0.90 | 0.01% | 3.10% | 0.00 | 0.000 | 0.811 | 0.94 | 0.01% | 6.58%  |
| PPT AS change  | Hannum      | 0.00 | 0.000 | 0.727 | 0.83 | 0.03% | 3.12% | 0.00 | 0.000 | 0.938 | 0.95 | 0.00% | 6.57%  |
| PPT AS change  | PCHannum    | 0.00 | 0.000 | 0.828 | 0.90 | 0.01% | 3.10% | 0.00 | 0.000 | 0.684 | 0.85 | 0.03% | 6.61%  |
| PPT AS change  | EEAA        | 0.00 | 0.000 | 0.723 | 0.83 | 0.03% | 3.12% | 0.00 | 0.000 | 0.890 | 0.94 | 0.00% | 6.58%  |
| PPT AS change  | IEAA        | 0.00 | 0.000 | 0.381 | 0.56 | 0.14% | 3.25% | 0.00 | 0.000 | 0.310 | 0.49 | 0.20% | 6.79%  |
| PPT AS change  | ENP         | 0.00 | 0.000 | 0.667 | 0.79 | 0.04% | 3.13% | 0.00 | 0.000 | 0.605 | 0.80 | 0.06% | 6.63%  |
| PPT AS change  | BLUP        | 0.00 | 0.000 | 0.957 | 0.96 | 0.00% | 3.09% | 0.00 | 0.000 | 0.852 | 0.94 | 0.01% | 6.58%  |
| PPT AS change  | Pheno       | 0.00 | 0.000 | 0.675 | 0.79 | 0.04% | 3.13% | 0.00 | 0.000 | 0.917 | 0.95 | 0.00% | 6.57%  |
| PPT AS change  | PCPheno     | 0.00 | 0.000 | 0.599 | 0.75 | 0.07% | 3.15% | 0.00 | 0.000 | 0.810 | 0.94 | 0.02% | 6.58%  |
| PPT AS change  | Grim        | 0.00 | 0.000 | 0.192 | 0.33 | 0.47% | 3.44% | 0.00 | 0.001 | 0.979 | 0.98 | 0.00% | 6.57%  |
| PPT AS change  | PCGrim      | 0.00 | 0.001 | 0.121 | 0.24 | 0.77% | 3.58% | 0.00 | 0.001 | 0.756 | 0.91 | 0.05% | 6.59%  |

|               |             |       |       |       |      |       |        |       |       |       |      |       |        |
|---------------|-------------|-------|-------|-------|------|-------|--------|-------|-------|-------|------|-------|--------|
| PPT AS change | DunedinPACE | 0.04  | 0.016 | 0.008 | 0.03 | 1.91% | 4.50%  | 0.03  | 0.018 | 0.087 | 0.19 | 1.52% | 7.18%  |
| VSM change    | Horvath     | 0.00  | 0.002 | 0.109 | 0.22 | 0.46% | 6.14%  | 0.00  | 0.003 | 0.156 | 0.29 | 0.48% | 7.92%  |
| VSM change    | PCHorvath   | -0.01 | 0.003 | 0.037 | 0.09 | 0.79% | 6.49%  | -0.01 | 0.003 | 0.051 | 0.13 | 0.87% | 8.29%  |
| VSM change    | Hannum      | -0.01 | 0.003 | 0.000 | 0.01 | 2.34% | 8.31%  | -0.01 | 0.003 | 0.001 | 0.01 | 2.44% | 9.84%  |
| VSM change    | PCHannum    | -0.01 | 0.003 | 0.014 | 0.04 | 1.08% | 6.81%  | -0.01 | 0.003 | 0.026 | 0.08 | 1.10% | 8.53%  |
| VSM change    | EEAA        | -0.01 | 0.002 | 0.000 | 0.00 | 2.54% | 8.66%  | -0.01 | 0.002 | 0.000 | 0.01 | 2.60% | 10.11% |
| VSM change    | IEAA        | 0.00  | 0.003 | 0.149 | 0.27 | 0.40% | 6.04%  | 0.00  | 0.003 | 0.198 | 0.34 | 0.43% | 7.85%  |
| VSM change    | ENP         | -0.01 | 0.003 | 0.000 | 0.01 | 2.66% | 8.51%  | -0.01 | 0.003 | 0.000 | 0.01 | 2.87% | 10.38% |
| VSM change    | BLUP        | -0.01 | 0.003 | 0.000 | 0.00 | 3.08% | 8.97%  | -0.01 | 0.003 | 0.000 | 0.01 | 3.20% | 10.74% |
| VSM change    | Pheno       | -0.01 | 0.002 | 0.004 | 0.02 | 1.61% | 7.25%  | -0.01 | 0.002 | 0.009 | 0.05 | 1.68% | 8.92%  |
| VSM change    | PCPheno     | -0.01 | 0.002 | 0.001 | 0.01 | 2.23% | 8.01%  | -0.01 | 0.003 | 0.001 | 0.01 | 2.31% | 9.65%  |
| VSM change    | Grim        | -0.01 | 0.003 | 0.000 | 0.01 | 2.18% | 8.04%  | -0.01 | 0.004 | 0.001 | 0.01 | 2.34% | 9.65%  |
| VSM change    | PCGrim      | -0.01 | 0.005 | 0.003 | 0.01 | 1.48% | 7.41%  | -0.01 | 0.005 | 0.012 | 0.05 | 1.48% | 8.82%  |
| VSM change    | DunedinPACE | -0.36 | 0.118 | 0.002 | 0.01 | 1.71% | 7.46%  | -0.35 | 0.131 | 0.008 | 0.05 | 2.08% | 8.97%  |
| VRM change    | Horvath     | -0.01 | 0.005 | 0.127 | 0.24 | 0.40% | 17.84% | -0.01 | 0.005 | 0.182 | 0.33 | 0.41% | 19.89% |
| VRM change    | PCHorvath   | -0.01 | 0.005 | 0.007 | 0.03 | 1.24% | 18.69% | -0.01 | 0.005 | 0.013 | 0.05 | 1.19% | 20.68% |
| VRM change    | Hannum      | -0.02 | 0.005 | 0.003 | 0.02 | 1.46% | 18.97% | -0.01 | 0.005 | 0.012 | 0.05 | 1.33% | 20.71% |
| VRM change    | PCHannum    | -0.01 | 0.005 | 0.006 | 0.03 | 1.27% | 18.74% | -0.01 | 0.005 | 0.014 | 0.06 | 1.19% | 20.65% |
| VRM change    | EEAA        | -0.01 | 0.004 | 0.002 | 0.01 | 1.59% | 19.16% | -0.01 | 0.004 | 0.007 | 0.04 | 1.47% | 20.88% |
| VRM change    | IEAA        | -0.01 | 0.005 | 0.174 | 0.30 | 0.34% | 17.75% | -0.01 | 0.005 | 0.223 | 0.37 | 0.36% | 19.83% |
| VRM change    | ENP         | -0.02 | 0.006 | 0.005 | 0.02 | 1.32% | 18.79% | -0.01 | 0.006 | 0.016 | 0.06 | 1.25% | 20.62% |
| VRM change    | BLUP        | -0.02 | 0.006 | 0.001 | 0.01 | 1.72% | 19.22% | -0.02 | 0.007 | 0.005 | 0.03 | 1.61% | 21.00% |
| VRM change    | Pheno       | 0.00  | 0.004 | 0.357 | 0.53 | 0.15% | 17.58% | 0.00  | 0.004 | 0.503 | 0.71 | 0.10% | 19.65% |
| VRM change    | PCPheno     | -0.02 | 0.005 | 0.001 | 0.01 | 2.01% | 19.49% | -0.02 | 0.005 | 0.001 | 0.01 | 2.02% | 21.50% |
| VRM change    | Grim        | -0.01 | 0.006 | 0.042 | 0.10 | 0.69% | 18.15% | -0.01 | 0.007 | 0.048 | 0.13 | 0.68% | 20.27% |
| VRM change    | PCGrim      | -0.02 | 0.009 | 0.036 | 0.09 | 0.70% | 18.20% | -0.02 | 0.010 | 0.032 | 0.10 | 0.78% | 20.39% |
| VRM change    | DunedinPACE | -0.17 | 0.221 | 0.449 | 0.63 | 0.10% | 17.53% | -0.15 | 0.247 | 0.541 | 0.74 | 0.09% | 19.63% |

|              |             |       |       |       |      |       |       |       |       |       |      |       |       |
|--------------|-------------|-------|-------|-------|------|-------|-------|-------|-------|-------|------|-------|-------|
| Speed change | Horvath     | -0.02 | 0.023 | 0.289 | 0.45 | 0.20% | 0.59% | -0.03 | 0.024 | 0.298 | 0.48 | 0.22% | 2.58% |
| Speed change | PCHorvath   | -0.08 | 0.026 | 0.003 | 0.01 | 1.68% | 2.24% | -0.08 | 0.027 | 0.003 | 0.02 | 1.69% | 4.32% |
| Speed change | Hannum      | -0.05 | 0.027 | 0.041 | 0.10 | 0.79% | 1.23% | -0.05 | 0.027 | 0.057 | 0.14 | 0.78% | 3.13% |
| Speed change | PCHannum    | -0.06 | 0.026 | 0.014 | 0.04 | 1.09% | 1.61% | -0.07 | 0.027 | 0.015 | 0.06 | 1.14% | 3.64% |
| Speed change | EEAA        | -0.05 | 0.021 | 0.029 | 0.08 | 0.87% | 1.35% | -0.05 | 0.022 | 0.035 | 0.10 | 0.93% | 3.31% |
| Speed change | IEAA        | -0.02 | 0.025 | 0.530 | 0.70 | 0.07% | 0.44% | -0.01 | 0.026 | 0.604 | 0.80 | 0.06% | 2.40% |
| Speed change | ENP         | -0.07 | 0.030 | 0.022 | 0.06 | 1.06% | 1.45% | -0.07 | 0.031 | 0.019 | 0.06 | 1.14% | 3.54% |
| Speed change | BLUP        | -0.09 | 0.031 | 0.007 | 0.03 | 1.49% | 1.89% | -0.09 | 0.033 | 0.009 | 0.05 | 1.64% | 3.83% |
| Speed change | Pheno       | -0.04 | 0.019 | 0.051 | 0.12 | 0.69% | 1.15% | -0.03 | 0.020 | 0.079 | 0.18 | 0.61% | 3.01% |
| Speed change | PCPheno     | -0.06 | 0.023 | 0.008 | 0.03 | 1.28% | 1.82% | -0.06 | 0.024 | 0.008 | 0.05 | 1.39% | 3.85% |
| Speed change | Grim        | -0.06 | 0.031 | 0.050 | 0.12 | 0.64% | 1.16% | -0.05 | 0.036 | 0.191 | 0.34 | 0.45% | 2.71% |
| Speed change | PCGrim      | -0.15 | 0.042 | 0.000 | 0.01 | 2.12% | 2.97% | -0.15 | 0.049 | 0.002 | 0.02 | 2.13% | 4.47% |
| Speed change | DunedinPACE | -1.29 | 1.108 | 0.245 | 0.41 | 0.21% | 0.64% | -1.19 | 1.244 | 0.338 | 0.51 | 0.17% | 2.54% |

**Supplementary Table 5: Cross sectional association of epigenetic age acceleration with MRI markers**

| PHENO | PREDICTOR      | MODEL 1 |                |              | MODEL 2 |                |              | MODEL 3 |                |              |
|-------|----------------|---------|----------------|--------------|---------|----------------|--------------|---------|----------------|--------------|
|       |                | Beta    | <i>p value</i> | <i>p adj</i> | Beta    | <i>p value</i> | <i>p adj</i> | Beta    | <i>p value</i> | <i>p adj</i> |
| BPF   | Horvath AA     | 0.00    | 0.017          | 0.13         | 0.00    | 0.009          | 0.07         | 0.00    | 0.019          | 0.12         |
| BPF   | PCHorvath AA   | 0.00    | 0.226          | 0.88         | 0.00    | 0.123          | 0.53         | 0.00    | 0.228          | 0.87         |
| BPF   | Hannum AA      | 0.00    | 0.007          | 0.06         | 0.00    | 0.003          | 0.03         | 0.00    | 0.004          | 0.04         |
| BPF   | PCHannum AA    | 0.00    | 0.101          | 0.49         | 0.00    | 0.054          | 0.26         | 0.00    | 0.108          | 0.52         |
| BPF   | EEAA           | 0.00    | 0.005          | 0.06         | 0.00    | 0.003          | 0.03         | 0.00    | 0.003          | 0.04         |
| BPF   | IEAA           | 0.00    | 0.026          | 0.14         | 0.00    | 0.015          | 0.09         | 0.00    | 0.021          | 0.12         |
| BPF   | ENP AA         | 0.00    | 0.002          | 0.05         | 0.00    | 0.001          | 0.02         | 0.00    | 0.002          | 0.03         |
| BPF   | BLUP AA        | 0.00    | 0.001          | 0.04         | 0.00    | 0.000          | 0.01         | 0.00    | 0.001          | 0.02         |
| BPF   | Pheno AA       | 0.00    | 0.024          | 0.14         | 0.00    | 0.015          | 0.09         | 0.00    | 0.021          | 0.12         |
| BPF   | PCPheno AA     | 0.00    | 0.420          | 0.99         | 0.00    | 0.359          | 0.98         | 0.00    | 0.446          | 0.87         |
| BPF   | Grim AA        | 0.00    | 0.831          | 1.00         | 0.00    | 0.228          | 0.89         | 0.00    | 0.299          | 0.87         |
| BPF   | PCGrim AA      | 0.00    | 0.143          | 0.62         | 0.00    | 0.415          | 0.98         | 0.00    | 0.259          | 0.87         |
| BPF   | DunedinPACE AA | 0.00    | 0.728          | 0.99         | 0.00    | 0.912          | 0.98         | 0.00    | 0.975          | 0.99         |
| WMHln | Horvath AA     | 0.00    | 0.705          | 0.99         | 0.00    | 0.662          | 0.98         | 0.00    | 0.691          | 0.87         |
| WMHln | PCHorvath AA   | 0.00    | 0.770          | 1.00         | 0.00    | 0.598          | 0.98         | 0.00    | 0.665          | 0.87         |
| WMHln | Hannum AA      | 0.00    | 0.674          | 0.99         | 0.00    | 0.751          | 0.98         | 0.00    | 0.891          | 0.99         |
| WMHln | PCHannum AA    | 0.00    | 0.898          | 1.00         | 0.00    | 0.834          | 0.98         | 0.00    | 0.970          | 0.99         |
| WMHln | EEAA           | 0.00    | 0.600          | 0.99         | 0.00    | 0.728          | 0.98         | 0.00    | 0.994          | 0.99         |
| WMHln | IEAA           | 0.00    | 0.731          | 0.99         | 0.00    | 0.656          | 0.98         | 0.00    | 0.569          | 0.87         |
| WMHln | ENP AA         | 0.00    | 0.579          | 0.99         | 0.00    | 0.627          | 0.98         | 0.00    | 0.583          | 0.87         |
| WMHln | BLUP AA        | 0.00    | 0.535          | 0.99         | 0.00    | 0.581          | 0.98         | 0.00    | 0.536          | 0.87         |
| WMHln | Pheno AA       | 0.00    | 0.521          | 0.99         | 0.00    | 0.500          | 0.98         | 0.00    | 0.333          | 0.87         |
| WMHln | PCPheno AA     | 0.00    | 0.923          | 1.00         | 0.00    | 0.914          | 0.98         | 0.00    | 0.603          | 0.87         |
| WMHln | Grim AA        | 0.00    | 0.605          | 0.99         | 0.00    | 0.572          | 0.98         | -0.01   | 0.465          | 0.87         |
| WMHln | PCGrim AA      | 0.00    | 0.804          | 1.00         | 0.00    | 0.853          | 0.98         | 0.00    | 0.902          | 0.99         |
| WMHln | DunedinPACE AA | -0.01   | 0.962          | 1.00         | -0.07   | 0.799          | 0.98         | -0.22   | 0.449          | 0.87         |
| WMHSc | Horvath AA     | 0.00    | 0.713          | 0.99         | 0.00    | 0.768          | 0.98         | 0.00    | 0.611          | 0.87         |
| WMHSc | PCHorvath AA   | 0.00    | 0.567          | 0.99         | 0.00    | 0.554          | 0.98         | 0.00    | 0.520          | 0.87         |



|       |                |      |       |      |      |       |      |       |       |      |
|-------|----------------|------|-------|------|------|-------|------|-------|-------|------|
| WMHSc | Hannum AA      | 0.00 | 0.465 | 0.99 | 0.00 | 0.491 | 0.98 | 0.00  | 0.526 | 0.87 |
| WMHSc | PCHannum AA    | 0.00 | 0.420 | 0.99 | 0.00 | 0.449 | 0.98 | 0.00  | 0.520 | 0.87 |
| WMHSc | EEAA           | 0.00 | 0.392 | 0.99 | 0.00 | 0.437 | 0.98 | 0.00  | 0.564 | 0.87 |
| WMHSc | IEAA           | 0.00 | 0.848 | 1.00 | 0.00 | 0.860 | 0.98 | 0.00  | 0.741 | 0.90 |
| WMHSc | ENP AA         | 0.00 | 0.883 | 1.00 | 0.00 | 0.992 | 0.99 | 0.00  | 0.956 | 0.99 |
| WMHSc | BLUP AA        | 0.00 | 0.995 | 1.00 | 0.00 | 0.854 | 0.98 | 0.00  | 0.838 | 0.99 |
| WMHSc | Pheno AA       | 0.00 | 0.972 | 1.00 | 0.00 | 0.753 | 0.98 | 0.00  | 0.473 | 0.87 |
| WMHSc | PCPheno AA     | 0.00 | 0.670 | 0.99 | 0.00 | 0.932 | 0.98 | 0.00  | 0.681 | 0.87 |
| WMHSc | Grim AA        | 0.00 | 0.737 | 0.99 | 0.00 | 0.993 | 0.99 | 0.00  | 0.683 | 0.87 |
| WMHSc | PCGrim AA      | 0.01 | 0.526 | 0.99 | 0.00 | 0.699 | 0.98 | -0.01 | 0.678 | 0.87 |
| WMHSc | DunedinPACE AA | 0.15 | 0.549 | 0.99 | 0.03 | 0.925 | 0.98 | -0.21 | 0.447 | 0.87 |

**Supplementary Table 6: Cross-sectional and longitudinal associations of epigenetic age acceleration with executive function and memory after adjusting for MRI markers**

|       |                | Cross-sectional: Executive Functions |                |         |                |             |                |             |                | Longitudinal: Executive Functions |                |         |                |             |                |             |                |
|-------|----------------|--------------------------------------|----------------|---------|----------------|-------------|----------------|-------------|----------------|-----------------------------------|----------------|---------|----------------|-------------|----------------|-------------|----------------|
|       |                | MODEL 1                              |                | MODEL 2 |                | MODEL WMHln |                | MODEL WMHSc |                | MODEL 1                           |                | MODEL 2 |                | MODEL WMHln |                | MODEL WMHSc |                |
| PHENO | PREDICTOR      | Beta                                 | <i>p value</i> | Beta    | <i>p value</i> | Beta        | <i>p value</i> | Beta        | <i>p value</i> | Beta                              | <i>p value</i> | Beta    | <i>p value</i> | Beta        | <i>p value</i> | Beta        | <i>p value</i> |
| TMT   | Horvath AA     | -0.10                                | 0.773          | 0.04    | 0.920          | -0.04       | 0.915          | -0.05       | 0.886          | 0.00                              | 0.820          | 0.00    | 0.848          | 0.00        | 0.719          | 0.00        | 0.809          |
| TMT   | PCHorvath AA   | 0.01                                 | 0.974          | 0.08    | 0.852          | 0.21        | 0.623          | 0.12        | 0.778          | -0.02                             | 0.056          | -0.02   | 0.078          | -0.02       | 0.169          | -0.02       | 0.138          |
| TMT   | Hannum AA      | -0.27                                | 0.516          | -0.12   | 0.786          | 0.14        | 0.758          | 0.10        | 0.827          | -0.03                             | 0.032          | -0.02   | 0.111          | -0.02       | 0.197          | -0.02       | 0.213          |
| TMT   | PCHannum AA    | -0.21                                | 0.610          | -0.13   | 0.752          | 0.05        | 0.904          | -0.03       | 0.944          | -0.03                             | 0.013          | -0.02   | 0.041          | -0.02       | 0.111          | -0.02       | 0.069          |
| TMT   | EEAA           | -0.31                                | 0.368          | -0.21   | 0.561          | 0.01        | 0.973          | -0.02       | 0.953          | -0.02                             | 0.022          | -0.02   | 0.076          | -0.01       | 0.172          | -0.01       | 0.148          |
| TMT   | IEAA           | 0.00                                 | 0.993          | 0.11    | 0.778          | 0.01        | 0.987          | 0.00        | 0.998          | 0.00                              | 0.872          | 0.00    | 0.908          | 0.00        | 0.851          | 0.00        | 0.857          |
| TMT   | Zhang ENP AA   | 0.34                                 | 0.489          | 0.55    | 0.273          | 0.70        | 0.182          | 0.64        | 0.216          | -0.03                             | 0.043          | -0.02   | 0.114          | -0.02       | 0.138          | -0.02       | 0.168          |
| TMT   | Zhang BLUP AA  | 0.02                                 | 0.963          | 0.12    | 0.812          | 0.28        | 0.602          | 0.24        | 0.649          | -0.04                             | 0.009          | -0.03   | 0.032          | -0.03       | 0.039          | -0.03       | 0.042          |
| TMT   | Pheno AA       | -0.11                                | 0.722          | 0.04    | 0.901          | 0.01        | 0.980          | 0.05        | 0.877          | -0.01                             | 0.268          | -0.01   | 0.523          | -0.01       | 0.455          | 0.00        | 0.575          |
| TMT   | PCPheno AA     | -0.10                                | 0.787          | -0.03   | 0.946          | 0.13        | 0.743          | 0.09        | 0.816          | -0.03                             | 0.002          | -0.03   | 0.010          | -0.02       | 0.028          | -0.02       | 0.029          |
| TMT   | Grim AA        | -0.61                                | 0.213          | -0.31   | 0.581          | -0.24       | 0.688          | -0.30       | 0.604          | -0.04                             | 0.003          | -0.04   | 0.019          | -0.03       | 0.055          | -0.03       | 0.031          |
| TMT   | PCGrim AA      | -1.22                                | 0.074          | -0.87   | 0.267          | -0.68       | 0.405          | -0.84       | 0.296          | -0.06                             | 0.001          | -0.05   | 0.012          | -0.04       | 0.046          | -0.05       | 0.027          |
| TMT   | DunedinPACE AA | -40.54                               | 0.019          | -32.50  | 0.086          | -32.53      | 0.098          | -33.21      | 0.089          | -1.37                             | 0.006          | -1.06   | 0.051          | -0.80       | 0.146          | -0.89       | 0.108          |
| WCST  | Horvath AA     | -0.09                                | 0.087          | -0.10   | 0.060          | -0.08       | 0.111          | -0.10       | 0.060          | 0.01                              | 0.141          | 0.01    | 0.100          | 0.01        | 0.151          | 0.01        | 0.095          |
| WCST  | PCHorvath AA   | -0.20                                | 0.001          | -0.24   | 0.000          | -0.20       | 0.000          | -0.24       | 0.000          | 0.02                              | 0.003          | 0.03    | 0.001          | 0.02        | 0.001          | 0.03        | 0.000          |
| WCST  | Hannum AA      | -0.20                                | 0.001          | -0.20   | 0.002          | -0.17       | 0.003          | -0.20       | 0.002          | 0.02                              | 0.002          | 0.02    | 0.004          | 0.02        | 0.006          | 0.02        | 0.004          |
| WCST  | PCHannum AA    | -0.22                                | 0.000          | -0.25   | 0.000          | -0.21       | 0.000          | -0.27       | 0.000          | 0.02                              | 0.001          | 0.03    | 0.001          | 0.02        | 0.001          | 0.03        | 0.000          |
| WCST  | EEAA           | -0.18                                | 0.000          | -0.17   | 0.001          | -0.14       | 0.003          | -0.18       | 0.001          | 0.02                              | 0.001          | 0.02    | 0.003          | 0.01        | 0.009          | 0.02        | 0.003          |
| WCST  | IEAA           | -0.06                                | 0.261          | -0.08   | 0.172          | -0.06       | 0.214          | -0.08       | 0.176          | 0.01                              | 0.251          | 0.01    | 0.161          | 0.01        | 0.184          | 0.01        | 0.163          |
| WCST  | Zhang ENP AA   | -0.29                                | 0.000          | -0.31   | 0.000          | -0.29       | 0.000          | -0.31       | 0.000          | 0.03                              | 0.001          | 0.03    | 0.000          | 0.03        | 0.000          | 0.03        | 0.000          |

|      |                |       |       |       |       |       |       |       |       |      |       |      |       |      |       |      |       |
|------|----------------|-------|-------|-------|-------|-------|-------|-------|-------|------|-------|------|-------|------|-------|------|-------|
| WCST | Zhang BLUP AA  | -0.27 | 0.000 | -0.31 | 0.000 | -0.30 | 0.000 | -0.33 | 0.000 | 0.03 | 0.001 | 0.03 | 0.000 | 0.03 | 0.000 | 0.04 | 0.000 |
| WCST | Pheno AA       | -0.11 | 0.010 | -0.12 | 0.011 | -0.12 | 0.005 | -0.11 | 0.014 | 0.01 | 0.016 | 0.01 | 0.017 | 0.01 | 0.006 | 0.01 | 0.022 |
| WCST | PCPheno AA     | -0.25 | 0.000 | -0.25 | 0.000 | -0.25 | 0.000 | -0.27 | 0.000 | 0.02 | 0.000 | 0.02 | 0.000 | 0.02 | 0.000 | 0.02 | 0.000 |
| WCST | Grim AA        | -0.14 | 0.049 | -0.17 | 0.038 | -0.17 | 0.025 | -0.18 | 0.032 | 0.02 | 0.021 | 0.02 | 0.022 | 0.02 | 0.007 | 0.02 | 0.014 |
| WCST | PCGrim AA      | -0.15 | 0.135 | -0.18 | 0.109 | -0.16 | 0.117 | -0.20 | 0.096 | 0.02 | 0.065 | 0.02 | 0.103 | 0.02 | 0.109 | 0.02 | 0.107 |
| WCST | DunedinPACE AA | -5.97 | 0.016 | -6.56 | 0.016 | -6.08 | 0.015 | -6.61 | 0.018 | 0.83 | 0.008 | 0.86 | 0.013 | 0.76 | 0.014 | 0.81 | 0.018 |

|              |                  | <b>Cross-Sectional: Memory</b> |                       |                |                       |                  |                       | <b>Longitudinal: Memory</b> |                       |                |                       |                  |                       |  |  |
|--------------|------------------|--------------------------------|-----------------------|----------------|-----------------------|------------------|-----------------------|-----------------------------|-----------------------|----------------|-----------------------|------------------|-----------------------|--|--|
|              |                  | <b>MODEL 1</b>                 |                       | <b>MODEL 2</b> |                       | <b>MODEL BPF</b> |                       | <b>MODEL 1</b>              |                       | <b>MODEL 2</b> |                       | <b>MODEL BPF</b> |                       |  |  |
| <b>PHENO</b> | <b>PREDICTOR</b> | <b>Beta</b>                    | <b><i>p value</i></b> | <b>Beta</b>    | <b><i>p value</i></b> | <b>Beta</b>      | <b><i>p value</i></b> | <b>Beta</b>                 | <b><i>p value</i></b> | <b>Beta</b>    | <b><i>p value</i></b> | <b>Beta</b>      | <b><i>p value</i></b> |  |  |
| VSM          | Horvath AA       | -0.29                          | 0.208                 | -0.26          | 0.264                 | -0.16            | 0.532                 | 0.00                        | 0.109                 | 0.00           | 0.156                 | 0.00             | 0.256                 |  |  |
| VSM          | PCHorvath AA     | -0.37                          | 0.144                 | -0.31          | 0.248                 | -0.11            | 0.711                 | -0.01                       | 0.037                 | -0.01          | 0.051                 | 0.00             | 0.223                 |  |  |
| VSM          | Hannum AA        | -0.60                          | 0.027                 | -0.52          | 0.063                 | -0.44            | 0.154                 | -0.01                       | 0.000                 | -0.01          | 0.001                 | -0.01            | 0.008                 |  |  |
| VSM          | PCHannum AA      | -0.43                          | 0.100                 | -0.34          | 0.211                 | -0.21            | 0.474                 | -0.01                       | 0.014                 | -0.01          | 0.026                 | 0.00             | 0.135                 |  |  |
| VSM          | EEAA             | -0.50                          | 0.024                 | -0.44          | 0.057                 | -0.42            | 0.097                 | -0.01                       | 0.000                 | -0.01          | 0.000                 | -0.01            | 0.003                 |  |  |
| VSM          | IEAA             | -0.33                          | 0.171                 | -0.30          | 0.221                 | -0.16            | 0.571                 | 0.00                        | 0.149                 | 0.00           | 0.198                 | 0.00             | 0.360                 |  |  |
| VSM          | Zhang ENP AA     | -0.62                          | 0.048                 | -0.59          | 0.064                 | -0.47            | 0.185                 | -0.01                       | 0.000                 | -0.01          | 0.000                 | -0.01            | 0.002                 |  |  |
| VSM          | Zhang BLUP AA    | -0.69                          | 0.033                 | -0.68          | 0.040                 | -0.46            | 0.214                 | -0.01                       | 0.000                 | -0.01          | 0.000                 | -0.01            | 0.002                 |  |  |
| VSM          | Pheno AA         | -0.23                          | 0.249                 | -0.13          | 0.528                 | -0.01            | 0.958                 | -0.01                       | 0.004                 | -0.01          | 0.009                 | 0.00             | 0.044                 |  |  |
| VSM          | PCPheno AA       | -0.56                          | 0.020                 | -0.50          | 0.043                 | -0.35            | 0.189                 | -0.01                       | 0.001                 | -0.01          | 0.001                 | -0.01            | 0.016                 |  |  |
| VSM          | Grim AA          | -0.84                          | 0.007                 | -0.43          | 0.237                 | -0.48            | 0.220                 | -0.01                       | 0.000                 | -0.01          | 0.001                 | -0.01            | 0.007                 |  |  |
| VSM          | PCGrim AA        | -1.16                          | 0.007                 | -0.61          | 0.229                 | -0.55            | 0.311                 | -0.01                       | 0.003                 | -0.01          | 0.012                 | -0.01            | 0.054                 |  |  |
| VSM          | DunedinPACE AA   | -42.22                         | 0.000                 | -34.23         | 0.005                 | -33.28           | 0.013                 | -0.36                       | 0.002                 | -0.35          | 0.008                 | -0.33            | 0.021                 |  |  |
| VRM          | Horvath AA       | -0.14                          | 0.428                 | -0.12          | 0.483                 | -0.07            | 0.729                 | -0.01                       | 0.127                 | -0.01          | 0.182                 | 0.00             | 0.454                 |  |  |

|     |                |       |       |       |       |       |       |       |       |       |       |       |       |
|-----|----------------|-------|-------|-------|-------|-------|-------|-------|-------|-------|-------|-------|-------|
| VRM | PCHorvath AA   | -0.25 | 0.197 | -0.25 | 0.231 | -0.12 | 0.595 | -0.01 | 0.007 | -0.01 | 0.013 | -0.01 | 0.102 |
| VRM | Hannum AA      | -0.36 | 0.085 | -0.27 | 0.203 | -0.30 | 0.205 | -0.02 | 0.003 | -0.01 | 0.012 | -0.01 | 0.020 |
| VRM | PCHannum AA    | -0.25 | 0.206 | -0.23 | 0.279 | -0.17 | 0.455 | -0.01 | 0.006 | -0.01 | 0.014 | -0.01 | 0.059 |
| VRM | EEAA           | -0.34 | 0.043 | -0.27 | 0.125 | -0.32 | 0.096 | -0.01 | 0.002 | -0.01 | 0.007 | -0.01 | 0.009 |
| VRM | IEAA           | -0.16 | 0.394 | -0.15 | 0.417 | -0.07 | 0.726 | -0.01 | 0.174 | -0.01 | 0.223 | 0.00  | 0.578 |
| VRM | Zhang ENP AA   | -0.42 | 0.080 | -0.29 | 0.233 | -0.36 | 0.171 | -0.02 | 0.005 | -0.01 | 0.016 | -0.01 | 0.028 |
| VRM | Zhang BLUP AA  | -0.38 | 0.128 | -0.31 | 0.215 | -0.21 | 0.450 | -0.02 | 0.001 | -0.02 | 0.005 | -0.02 | 0.014 |
| VRM | Pheno AA       | 0.01  | 0.943 | 0.04  | 0.778 | 0.12  | 0.460 | 0.00  | 0.357 | 0.00  | 0.503 | 0.00  | 0.849 |
| VRM | PCPheno AA     | -0.34 | 0.061 | -0.33 | 0.080 | -0.22 | 0.280 | -0.02 | 0.001 |       | 0.001 | -0.01 | 0.010 |
| VRM | Grim AA        | -0.14 | 0.557 | -0.10 | 0.732 | -0.09 | 0.765 | -0.01 | 0.042 | -0.01 | 0.048 | -0.01 | 0.075 |
| VRM | PCGrim AA      | -0.47 | 0.159 | -0.56 | 0.153 | -0.34 | 0.409 | -0.02 | 0.036 | -0.02 | 0.032 | -0.02 | 0.040 |
| VRM | DunedinPACE AA | -5.33 | 0.528 | -4.08 | 0.666 | 2.71  | 0.787 | -0.17 | 0.449 | -0.15 | 0.541 | -0.09 | 0.716 |

**Supplementary Table 7: Cross-sectional and longitudinal associations of epigenetic age acceleration with cognition in presence of white blood cell counts**

| Cross-sectional Analysis |                |         |                |              |         |                |              |         |                |              |
|--------------------------|----------------|---------|----------------|--------------|---------|----------------|--------------|---------|----------------|--------------|
|                          |                | MODEL 1 |                |              | MODEL 2 |                |              | MODEL 3 |                |              |
| PHENO                    | PREDICTOR      | Beta    | <i>p value</i> | <i>p adj</i> | Beta    | <i>p value</i> | <i>p adj</i> | Beta    | <i>p value</i> | <i>p adj</i> |
| MMSE                     | Horvath AA     | 0.01    | 0.165          | 0.32         | 0.02    | 0.099          | 0.24         | 0.02    | 0.047          | 0.19         |
| MMSE                     | PCHorvath AA   | 0.03    | 0.026          | 0.12         | 0.03    | 0.014          | 0.08         | 0.04    | 0.003          | 0.04         |
| MMSE                     | Hannum AA      | 0.03    | 0.009          | 0.06         | 0.04    | 0.004          | 0.04         | 0.04    | 0.001          | 0.02         |
| MMSE                     | PCHannum AA    | 0.02    | 0.116          | 0.27         | 0.02    | 0.074          | 0.21         | 0.03    | 0.024          | 0.14         |
| MMSE                     | EEAA           | 0.02    | 0.032          | 0.13         | 0.03    | 0.016          | 0.09         | 0.03    | 0.004          | 0.04         |
| MMSE                     | IEAA           | 0.02    | 0.150          | 0.30         | 0.02    | 0.102          | 0.24         | 0.02    | 0.084          | 0.26         |
| MMSE                     | ENP AA         | 0.05    | 0.001          | 0.01         | 0.06    | 0.000          | 0.00         | 0.06    | 0.000          | 0.01         |
| MMSE                     | BLUP AA        | 0.04    | 0.003          | 0.03         | 0.04    | 0.006          | 0.05         | 0.05    | 0.004          | 0.04         |
| MMSE                     | Pheno AA       | 0.01    | 0.147          | 0.30         | 0.01    | 0.144          | 0.30         | 0.02    | 0.096          | 0.26         |
| MMSE                     | PCPheno AA     | 0.03    | 0.019          | 0.10         | 0.03    | 0.020          | 0.10         | 0.04    | 0.006          | 0.05         |
| MMSE                     | Grim AA        | 0.01    | 0.612          | 0.72         | 0.02    | 0.197          | 0.38         | 0.03    | 0.147          | 0.34         |
| MMSE                     | PCGrim AA      | 0.01    | 0.692          | 0.76         | 0.03    | 0.229          | 0.39         | 0.04    | 0.127          | 0.32         |
| MMSE                     | DunedinPACE AA | 0.63    | 0.219          | 0.35         | 0.71    | 0.209          | 0.39         | 0.93    | 0.115          | 0.30         |
| MDRS                     | Horvath AA     | -0.02   | 0.351          | 0.48         | -0.01   | 0.516          | 0.64         | -0.02   | 0.395          | 0.55         |
| MDRS                     | PCHorvath AA   | 0.04    | 0.122          | 0.28         | 0.03    | 0.258          | 0.41         | 0.03    | 0.320          | 0.50         |
| MDRS                     | Hannum AA      | 0.02    | 0.378          | 0.51         | 0.03    | 0.297          | 0.42         | 0.03    | 0.313          | 0.50         |
| MDRS                     | PCHannum AA    | 0.04    | 0.105          | 0.26         | 0.04    | 0.170          | 0.34         | 0.04    | 0.222          | 0.45         |
| MDRS                     | EEAA           | 0.02    | 0.328          | 0.46         | 0.02    | 0.335          | 0.46         | 0.02    | 0.347          | 0.53         |
| MDRS                     | IEAA           | -0.03   | 0.168          | 0.32         | -0.03   | 0.280          | 0.41         | -0.03   | 0.267          | 0.49         |
| MDRS                     | ENP AA         | 0.03    | 0.285          | 0.42         | 0.05    | 0.125          | 0.28         | 0.05    | 0.143          | 0.34         |
| MDRS                     | BLUP AA        | 0.03    | 0.297          | 0.43         | 0.03    | 0.291          | 0.42         | 0.03    | 0.311          | 0.50         |
| MDRS                     | Pheno AA       | 0.01    | 0.505          | 0.63         | 0.02    | 0.281          | 0.41         | 0.02    | 0.292          | 0.50         |
| MDRS                     | PCPheno AA     | 0.02    | 0.384          | 0.51         | 0.01    | 0.719          | 0.80         | 0.01    | 0.698          | 0.76         |
| MDRS                     | Grim AA        | 0.03    | 0.342          | 0.48         | 0.03    | 0.447          | 0.57         | 0.03    | 0.496          | 0.65         |
| MDRS                     | PCGrim AA      | -0.01   | 0.878          | 0.91         | -0.02   | 0.630          | 0.72         | -0.03   | 0.565          | 0.68         |
| MDRS                     | DunedinPACE AA | 0.30    | 0.786          | 0.82         | -0.58   | 0.626          | 0.72         | -0.87   | 0.483          | 0.64         |

|         |                |        |       |      |        |       |      |        |       |      |
|---------|----------------|--------|-------|------|--------|-------|------|--------|-------|------|
| TMT     | Horvath AA     | -0.10  | 0.773 | 0.82 | 0.04   | 0.920 | 0.94 | 0.06   | 0.877 | 0.90 |
| TMT     | PCHorvath AA   | 0.01   | 0.974 | 0.98 | 0.08   | 0.852 | 0.89 | 0.10   | 0.817 | 0.86 |
| TMT     | Hannum AA      | -0.27  | 0.516 | 0.63 | -0.12  | 0.786 | 0.84 | -0.04  | 0.926 | 0.93 |
| TMT     | PCHannum AA    | -0.21  | 0.610 | 0.72 | -0.13  | 0.752 | 0.82 | -0.12  | 0.791 | 0.85 |
| TMT     | EEAA           | -0.31  | 0.368 | 0.50 | -0.21  | 0.561 | 0.68 | -0.16  | 0.682 | 0.75 |
| TMT     | IEAA           | 0.00   | 0.993 | 0.99 | 0.11   | 0.778 | 0.84 | 0.18   | 0.642 | 0.73 |
| TMT     | ENP AA         | 0.34   | 0.489 | 0.62 | 0.55   | 0.273 | 0.41 | 0.64   | 0.217 | 0.45 |
| TMT     | BLUP AA        | 0.02   | 0.963 | 0.98 | 0.12   | 0.812 | 0.86 | 0.22   | 0.678 | 0.75 |
| TMT     | Pheno AA       | -0.11  | 0.722 | 0.78 | 0.04   | 0.901 | 0.92 | 0.15   | 0.660 | 0.74 |
| TMT     | PCPheno AA     | -0.10  | 0.787 | 0.82 | -0.03  | 0.946 | 0.95 | 0.14   | 0.743 | 0.80 |
| TMT     | Grim AA        | -0.61  | 0.213 | 0.35 | -0.31  | 0.581 | 0.69 | -0.29  | 0.624 | 0.72 |
| TMT     | PCGrim AA      | -1.22  | 0.074 | 0.22 | -0.87  | 0.267 | 0.41 | -0.78  | 0.377 | 0.54 |
| TMT     | DunedinPACE AA | -40.54 | 0.019 | 0.10 | -32.50 | 0.086 | 0.23 | -33.23 | 0.092 | 0.26 |
| WCST    | Horvath AA     | -0.09  | 0.087 | 0.23 | -0.10  | 0.060 | 0.19 | -0.05  | 0.380 | 0.54 |
| WCST    | PCHorvath AA   | -0.20  | 0.001 | 0.01 | -0.24  | 0.000 | 0.00 | -0.18  | 0.007 | 0.05 |
| WCST    | Hannum AA      | -0.20  | 0.001 | 0.01 | -0.20  | 0.002 | 0.02 | -0.15  | 0.027 | 0.14 |
| WCST    | PCHannum AA    | -0.22  | 0.000 | 0.00 | -0.25  | 0.000 | 0.00 | -0.20  | 0.003 | 0.04 |
| WCST    | EEAA           | -0.18  | 0.000 | 0.00 | -0.17  | 0.001 | 0.01 | -0.14  | 0.014 | 0.10 |
| WCST    | IEAA           | -0.06  | 0.261 | 0.39 | -0.08  | 0.172 | 0.34 | -0.04  | 0.526 | 0.67 |
| WCST    | ENP AA         | -0.29  | 0.000 | 0.00 | -0.31  | 0.000 | 0.00 | -0.28  | 0.000 | 0.01 |
| WCST    | BLUP AA        | -0.27  | 0.000 | 0.00 | -0.31  | 0.000 | 0.00 | -0.27  | 0.000 | 0.01 |
| WCST    | Pheno AA       | -0.11  | 0.010 | 0.06 | -0.12  | 0.011 | 0.07 | -0.08  | 0.076 | 0.25 |
| WCST    | PCPheno AA     | -0.25  | 0.000 | 0.00 | -0.25  | 0.000 | 0.00 | -0.24  | 0.000 | 0.01 |
| WCST    | Grim AA        | -0.14  | 0.049 | 0.16 | -0.17  | 0.038 | 0.15 | -0.13  | 0.137 | 0.34 |
| WCST    | PCGrim AA      | -0.15  | 0.135 | 0.29 | -0.18  | 0.109 | 0.26 | -0.08  | 0.543 | 0.67 |
| WCST    | DunedinPACE AA | -5.97  | 0.016 | 0.09 | -6.56  | 0.016 | 0.09 | -6.22  | 0.027 | 0.14 |
| PPT RLB | Horvath AA     | 0.07   | 0.049 | 0.16 | 0.09   | 0.013 | 0.08 | 0.08   | 0.030 | 0.15 |
| PPT RLB | PCHorvath AA   | 0.07   | 0.066 | 0.20 | 0.09   | 0.025 | 0.11 | 0.09   | 0.043 | 0.19 |
| PPT RLB | Hannum AA      | 0.04   | 0.326 | 0.46 | 0.07   | 0.091 | 0.24 | 0.06   | 0.151 | 0.34 |
| PPT RLB | PCHannum AA    | 0.06   | 0.164 | 0.32 | 0.08   | 0.063 | 0.19 | 0.07   | 0.095 | 0.26 |
| PPT RLB | EEAA           | 0.04   | 0.268 | 0.40 | 0.06   | 0.099 | 0.24 | 0.05   | 0.166 | 0.36 |
| PPT RLB | IEAA           | 0.05   | 0.139 | 0.30 | 0.07   | 0.043 | 0.15 | 0.07   | 0.052 | 0.19 |

|              |                |       |       |      |       |       |      |       |       |      |
|--------------|----------------|-------|-------|------|-------|-------|------|-------|-------|------|
| PPT RLB      | ENP AA         | 0.13  | 0.007 | 0.06 | 0.17  | 0.001 | 0.01 | 0.16  | 0.001 | 0.02 |
| PPT RLB      | BLUP AA        | 0.08  | 0.116 | 0.27 | 0.11  | 0.028 | 0.11 | 0.10  | 0.041 | 0.19 |
| PPT RLB      | Pheno AA       | 0.05  | 0.094 | 0.24 | 0.08  | 0.010 | 0.07 | 0.08  | 0.010 | 0.07 |
| PPT RLB      | PCPheno AA     | 0.06  | 0.083 | 0.23 | 0.07  | 0.045 | 0.15 | 0.08  | 0.052 | 0.19 |
| PPT RLB      | Grim AA        | -0.06 | 0.225 | 0.35 | 0.04  | 0.469 | 0.59 | 0.05  | 0.374 | 0.54 |
| PPT RLB      | PCGrim AA      | -0.08 | 0.193 | 0.35 | 0.03  | 0.684 | 0.77 | 0.05  | 0.524 | 0.67 |
| PPT RLB      | DunedinPACE AA | -2.22 | 0.179 | 0.33 | -0.89 | 0.627 | 0.72 | -0.47 | 0.803 | 0.85 |
| PPT Assembly | Horvath AA     | 0.02  | 0.514 | 0.63 | 0.04  | 0.310 | 0.44 | 0.03  | 0.519 | 0.67 |
| PPT Assembly | PCHorvath AA   | 0.02  | 0.680 | 0.76 | 0.03  | 0.451 | 0.57 | 0.03  | 0.548 | 0.67 |
| PPT Assembly | Hannum AA      | 0.02  | 0.696 | 0.76 | 0.05  | 0.266 | 0.41 | 0.05  | 0.302 | 0.50 |
| PPT Assembly | PCHannum AA    | 0.02  | 0.618 | 0.72 | 0.04  | 0.333 | 0.46 | 0.04  | 0.390 | 0.55 |
| PPT Assembly | EEAA           | 0.02  | 0.679 | 0.76 | 0.04  | 0.333 | 0.46 | 0.04  | 0.317 | 0.50 |
| PPT Assembly | IEAA           | 0.01  | 0.772 | 0.82 | 0.02  | 0.583 | 0.69 | 0.02  | 0.641 | 0.73 |
| PPT Assembly | ENP AA         | 0.09  | 0.097 | 0.25 | 0.12  | 0.025 | 0.11 | 0.12  | 0.026 | 0.14 |
| PPT Assembly | BLUP AA        | 0.07  | 0.220 | 0.35 | 0.09  | 0.100 | 0.24 | 0.08  | 0.140 | 0.34 |
| PPT Assembly | Pheno AA       | 0.02  | 0.499 | 0.63 | 0.05  | 0.115 | 0.26 | 0.06  | 0.085 | 0.26 |
| PPT Assembly | PCPheno AA     | 0.02  | 0.684 | 0.76 | 0.03  | 0.449 | 0.57 | 0.05  | 0.285 | 0.50 |
| PPT Assembly | Grim AA        | -0.06 | 0.222 | 0.35 | 0.06  | 0.357 | 0.48 | 0.09  | 0.147 | 0.34 |
| PPT Assembly | PCGrim AA      | -0.11 | 0.120 | 0.28 | 0.01  | 0.882 | 0.91 | 0.09  | 0.321 | 0.50 |
| PPT Assembly | DunedinPACE AA | -4.73 | 0.009 | 0.06 | -2.95 | 0.141 | 0.30 | -2.33 | 0.263 | 0.49 |
| VSM          | Horvath AA     | -0.29 | 0.208 | 0.35 | -0.26 | 0.264 | 0.41 | -0.30 | 0.231 | 0.47 |
| VSM          | PCHorvath AA   | -0.37 | 0.144 | 0.30 | -0.31 | 0.248 | 0.40 | -0.32 | 0.266 | 0.49 |
| VSM          | Hannum AA      | -0.60 | 0.027 | 0.12 | -0.52 | 0.063 | 0.19 | -0.51 | 0.089 | 0.26 |
| VSM          | PCHannum AA    | -0.43 | 0.100 | 0.25 | -0.34 | 0.211 | 0.39 | -0.33 | 0.262 | 0.49 |
| VSM          | EEAA           | -0.50 | 0.024 | 0.11 | -0.44 | 0.057 | 0.19 | -0.45 | 0.081 | 0.26 |
| VSM          | IEAA           | -0.33 | 0.171 | 0.32 | -0.30 | 0.221 | 0.39 | -0.28 | 0.270 | 0.49 |
| VSM          | ENP AA         | -0.62 | 0.048 | 0.16 | -0.59 | 0.064 | 0.19 | -0.59 | 0.073 | 0.24 |
| VSM          | BLUP AA        | -0.69 | 0.033 | 0.13 | -0.68 | 0.040 | 0.15 | -0.66 | 0.051 | 0.19 |
| VSM          | Pheno AA       | -0.23 | 0.249 | 0.38 | -0.13 | 0.528 | 0.64 | -0.05 | 0.828 | 0.87 |
| VSM          | PCPheno AA     | -0.56 | 0.020 | 0.10 | -0.50 | 0.043 | 0.15 | -0.47 | 0.094 | 0.26 |
| VSM          | Grim AA        | -0.84 | 0.007 | 0.06 | -0.43 | 0.237 | 0.39 | -0.34 | 0.374 | 0.54 |
| VSM          | PCGrim AA      | -1.16 | 0.007 | 0.06 | -0.61 | 0.229 | 0.39 | -0.30 | 0.598 | 0.71 |

|                              |                  |                |                       |                     |                |                       |                     |                |                       |                     |
|------------------------------|------------------|----------------|-----------------------|---------------------|----------------|-----------------------|---------------------|----------------|-----------------------|---------------------|
| VSM                          | DunedinPACE AA   | -42.22         | 0.000                 | 0.00                | -34.23         | 0.005                 | 0.04                | -30.56         | 0.017                 | 0.10                |
| VRM                          | Horvath AA       | -0.14          | 0.428                 | 0.55                | -0.12          | 0.483                 | 0.60                | -0.10          | 0.613                 | 0.72                |
| VRM                          | PCHorvath AA     | -0.25          | 0.197                 | 0.35                | -0.25          | 0.231                 | 0.39                | -0.20          | 0.362                 | 0.54                |
| VRM                          | Hannum AA        | -0.36          | 0.085                 | 0.23                | -0.27          | 0.203                 | 0.39                | -0.19          | 0.406                 | 0.56                |
| VRM                          | PCHannum AA      | -0.25          | 0.206                 | 0.35                | -0.23          | 0.279                 | 0.41                | -0.17          | 0.446                 | 0.60                |
| VRM                          | EEAA             | -0.34          | 0.043                 | 0.16                | -0.27          | 0.125                 | 0.28                | -0.20          | 0.309                 | 0.50                |
| VRM                          | IEAA             | -0.16          | 0.394                 | 0.51                | -0.15          | 0.417                 | 0.55                | -0.10          | 0.593                 | 0.71                |
| VRM                          | ENP AA           | -0.42          | 0.080                 | 0.23                | -0.29          | 0.233                 | 0.39                | -0.25          | 0.323                 | 0.50                |
| VRM                          | BLUP AA          | -0.38          | 0.128                 | 0.28                | -0.31          | 0.215                 | 0.39                | -0.27          | 0.304                 | 0.50                |
| VRM                          | Pheno AA         | 0.01           | 0.943                 | 0.97                | 0.04           | 0.778                 | 0.84                | 0.13           | 0.409                 | 0.56                |
| VRM                          | PCPheno AA       | -0.34          | 0.061                 | 0.19                | -0.33          | 0.080                 | 0.22                | -0.22          | 0.303                 | 0.50                |
| VRM                          | Grim AA          | -0.14          | 0.557                 | 0.66                | -0.10          | 0.732                 | 0.81                | 0.02           | 0.946                 | 0.95                |
| VRM                          | PCGrim AA        | -0.47          | 0.159                 | 0.31                | -0.56          | 0.153                 | 0.31                | -0.27          | 0.535                 | 0.67                |
| VRM                          | DunedinPACE AA   | -5.33          | 0.528                 | 0.64                | -4.08          | 0.666                 | 0.76                | -1.67          | 0.865                 | 0.90                |
| Speed                        | Horvath AA       | 0.98           | 0.205                 | 0.35                | 1.38           | 0.082                 | 0.22                | 1.19           | 0.159                 | 0.35                |
| Speed                        | PCHorvath AA     | 2.10           | 0.015                 | 0.09                | 2.44           | 0.007                 | 0.05                | 2.36           | 0.016                 | 0.10                |
| Speed                        | Hannum AA        | 1.80           | 0.046                 | 0.16                | 2.07           | 0.027                 | 0.11                | 1.94           | 0.053                 | 0.19                |
| Speed                        | PCHannum AA      | 1.77           | 0.045                 | 0.16                | 2.11           | 0.021                 | 0.10                | 2.02           | 0.043                 | 0.19                |
| Speed                        | EEAA             | 1.43           | 0.053                 | 0.17                | 1.69           | 0.028                 | 0.11                | 1.73           | 0.045                 | 0.19                |
| Speed                        | IEAA             | 0.92           | 0.258                 | 0.39                | 1.23           | 0.139                 | 0.30                | 1.01           | 0.238                 | 0.47                |
| Speed                        | ENP AA           | 3.17           | 0.003                 | 0.03                | 3.56           | 0.001                 | 0.01                | 3.47           | 0.002                 | 0.03                |
| Speed                        | BLUP AA          | 3.10           | 0.004                 | 0.04                | 3.55           | 0.001                 | 0.02                | 3.40           | 0.003                 | 0.04                |
| Speed                        | Pheno AA         | 1.38           | 0.035                 | 0.13                | 1.41           | 0.038                 | 0.15                | 1.31           | 0.065                 | 0.22                |
| Speed                        | PCPheno AA       | 2.02           | 0.011                 | 0.07                | 2.34           | 0.005                 | 0.04                | 2.62           | 0.005                 | 0.05                |
| Speed                        | Grim AA          | 0.50           | 0.630                 | 0.72                | 0.06           | 0.959                 | 0.96                | -0.17          | 0.893                 | 0.91                |
| Speed                        | PCGrim AA        | 1.23           | 0.395                 | 0.51                | 1.49           | 0.381                 | 0.51                | 1.20           | 0.530                 | 0.67                |
| Speed                        | DunedinPACE AA   | -46.60         | 0.202                 | 0.35                | -49.52         | 0.227                 | 0.39                | -54.99         | 0.197                 | 0.42                |
| <b>Longitudinal analysis</b> |                  |                |                       |                     |                |                       |                     |                |                       |                     |
|                              |                  | <b>MODEL 1</b> |                       |                     | <b>MODEL 2</b> |                       |                     | <b>MODEL 3</b> |                       |                     |
| <b>PHENO</b>                 | <b>PREDICTOR</b> | <b>Beta</b>    | <b><i>p value</i></b> | <b><i>p adj</i></b> | <b>Beta</b>    | <b><i>p value</i></b> | <b><i>p adj</i></b> | <b>Beta</b>    | <b><i>p value</i></b> | <b><i>p adj</i></b> |
| MMSE change                  | Horvath AA       | 0.00           | 0.925                 | 0.95                | 0.00           | 0.955                 | 0.96                | 0.00           | 0.993                 | 0.99                |



|             |                |       |       |      |       |       |      |       |       |      |
|-------------|----------------|-------|-------|------|-------|-------|------|-------|-------|------|
| MMSE change | PCHorvath AA   | 0.00  | 0.780 | 0.87 | 0.00  | 0.769 | 0.91 | 0.00  | 0.756 | 0.93 |
| MMSE change | Hannum AA      | 0.00  | 0.596 | 0.75 | 0.00  | 0.816 | 0.94 | 0.00  | 0.777 | 0.93 |
| MMSE change | PCHannum AA    | 0.00  | 0.612 | 0.75 | 0.00  | 0.653 | 0.84 | 0.00  | 0.656 | 0.87 |
| MMSE change | EEAA           | 0.00  | 0.616 | 0.75 | 0.00  | 0.823 | 0.94 | 0.00  | 0.720 | 0.92 |
| MMSE change | IEAA           | 0.00  | 0.817 | 0.90 | 0.00  | 0.895 | 0.94 | 0.00  | 0.823 | 0.93 |
| MMSE change | ENP AA         | 0.00  | 0.581 | 0.74 | 0.00  | 0.685 | 0.85 | 0.00  | 0.679 | 0.88 |
| MMSE change | BLUP AA        | 0.00  | 0.737 | 0.83 | 0.00  | 0.848 | 0.94 | 0.00  | 0.908 | 0.97 |
| MMSE change | Pheno AA       | 0.00  | 0.925 | 0.95 | 0.00  | 0.889 | 0.94 | 0.00  | 0.776 | 0.93 |
| MMSE change | PCPheno AA     | 0.00  | 0.482 | 0.66 | 0.00  | 0.545 | 0.74 | 0.00  | 0.756 | 0.93 |
| MMSE change | Grim AA        | 0.00  | 0.157 | 0.28 | 0.00  | 0.067 | 0.16 | 0.00  | 0.076 | 0.23 |
| MMSE change | PCGrim AA      | 0.00  | 0.416 | 0.59 | 0.00  | 0.222 | 0.37 | 0.00  | 0.330 | 0.55 |
| MMSE change | DunedinPACE AA | -0.01 | 0.516 | 0.69 | -0.02 | 0.363 | 0.54 | -0.02 | 0.441 | 0.68 |
| MDRS change | Horvath AA     | 0.00  | 0.579 | 0.74 | 0.00  | 0.338 | 0.51 | 0.00  | 0.228 | 0.45 |
| MDRS change | PCHorvath AA   | 0.00  | 0.929 | 0.95 | 0.00  | 0.768 | 0.91 | 0.00  | 0.511 | 0.74 |
| MDRS change | Hannum AA      | 0.00  | 0.903 | 0.95 | 0.00  | 0.633 | 0.82 | 0.00  | 0.351 | 0.56 |
| MDRS change | PCHannum AA    | 0.00  | 0.927 | 0.95 | 0.00  | 0.742 | 0.91 | 0.00  | 0.470 | 0.70 |
| MDRS change | EEAA           | 0.00  | 0.998 | 1.00 | 0.00  | 0.682 | 0.85 | 0.00  | 0.279 | 0.49 |
| MDRS change | IEAA           | 0.00  | 0.511 | 0.69 | 0.00  | 0.344 | 0.52 | 0.00  | 0.261 | 0.48 |
| MDRS change | ENP AA         | 0.00  | 0.485 | 0.66 | 0.00  | 0.766 | 0.91 | 0.00  | 0.873 | 0.95 |
| MDRS change | BLUP AA        | 0.00  | 0.412 | 0.59 | 0.00  | 0.621 | 0.82 | 0.00  | 0.637 | 0.87 |
| MDRS change | Pheno AA       | 0.00  | 0.630 | 0.75 | 0.00  | 0.877 | 0.94 | 0.00  | 0.827 | 0.93 |
| MDRS change | PCPheno AA     | 0.00  | 0.211 | 0.36 | 0.00  | 0.391 | 0.57 | 0.00  | 0.841 | 0.94 |
| MDRS change | Grim AA        | 0.00  | 0.413 | 0.59 | 0.00  | 0.280 | 0.46 | 0.00  | 0.474 | 0.70 |
| MDRS change | PCGrim AA      | 0.00  | 0.535 | 0.70 | 0.00  | 0.428 | 0.61 | 0.00  | 0.994 | 0.99 |
| MDRS change | DunedinPACE AA | -0.09 | 0.295 | 0.45 | -0.08 | 0.420 | 0.61 | -0.03 | 0.783 | 0.93 |
| TMT change  | Horvath AA     | 0.00  | 0.820 | 0.90 | 0.00  | 0.848 | 0.94 | 0.00  | 0.864 | 0.95 |
| TMT change  | PCHorvath AA   | -0.02 | 0.056 | 0.13 | -0.02 | 0.078 | 0.18 | -0.02 | 0.095 | 0.25 |
| TMT change  | Hannum AA      | -0.03 | 0.032 | 0.09 | -0.02 | 0.111 | 0.22 | -0.01 | 0.254 | 0.47 |
| TMT change  | PCHannum AA    | -0.03 | 0.013 | 0.04 | -0.02 | 0.041 | 0.12 | -0.02 | 0.068 | 0.23 |
| TMT change  | EEAA           | -0.02 | 0.022 | 0.06 | -0.02 | 0.076 | 0.18 | -0.01 | 0.229 | 0.45 |
| TMT change  | IEAA           | 0.00  | 0.872 | 0.93 | 0.00  | 0.908 | 0.95 | 0.00  | 0.714 | 0.92 |
| TMT change  | ENP AA         | -0.03 | 0.043 | 0.10 | -0.02 | 0.114 | 0.22 | -0.02 | 0.161 | 0.35 |

|                |                |       |       |      |       |       |      |       |       |      |
|----------------|----------------|-------|-------|------|-------|-------|------|-------|-------|------|
| TMT change     | BLUP AA        | -0.04 | 0.009 | 0.03 | -0.03 | 0.032 | 0.10 | -0.03 | 0.066 | 0.23 |
| TMT change     | Pheno AA       | -0.01 | 0.268 | 0.43 | -0.01 | 0.523 | 0.73 | 0.00  | 0.903 | 0.97 |
| TMT change     | PCPheno AA     | -0.03 | 0.002 | 0.01 | -0.03 | 0.010 | 0.05 | -0.02 | 0.081 | 0.23 |
| TMT change     | Grim AA        | -0.04 | 0.003 | 0.02 | -0.04 | 0.019 | 0.06 | -0.03 | 0.063 | 0.23 |
| TMT change     | PCGrim AA      | -0.06 | 0.001 | 0.01 | -0.05 | 0.012 | 0.05 | -0.03 | 0.178 | 0.38 |
| TMT change     | DunedinPACE AA | -1.37 | 0.006 | 0.03 | -1.06 | 0.051 | 0.13 | -0.76 | 0.185 | 0.39 |
| WCST change    | Horvath AA     | 0.01  | 0.141 | 0.26 | 0.01  | 0.100 | 0.21 | 0.01  | 0.364 | 0.57 |
| WCST change    | PCHorvath AA   | 0.02  | 0.003 | 0.02 | 0.03  | 0.001 | 0.01 | 0.02  | 0.014 | 0.09 |
| WCST change    | Hannum AA      | 0.02  | 0.002 | 0.01 | 0.02  | 0.004 | 0.03 | 0.01  | 0.080 | 0.23 |
| WCST change    | PCHannum AA    | 0.02  | 0.001 | 0.01 | 0.03  | 0.001 | 0.01 | 0.02  | 0.013 | 0.09 |
| WCST change    | EEAA           | 0.02  | 0.001 | 0.01 | 0.02  | 0.003 | 0.02 | 0.01  | 0.076 | 0.23 |
| WCST change    | IEAA           | 0.01  | 0.251 | 0.41 | 0.01  | 0.161 | 0.29 | 0.01  | 0.349 | 0.56 |
| WCST change    | ENP AA         | 0.03  | 0.001 | 0.01 | 0.03  | 0.000 | 0.01 | 0.03  | 0.002 | 0.04 |
| WCST change    | BLUP AA        | 0.03  | 0.001 | 0.01 | 0.03  | 0.000 | 0.01 | 0.03  | 0.001 | 0.03 |
| WCST change    | Pheno AA       | 0.01  | 0.016 | 0.05 | 0.01  | 0.017 | 0.06 | 0.01  | 0.071 | 0.23 |
| WCST change    | PCPheno AA     | 0.02  | 0.000 | 0.01 | 0.02  | 0.000 | 0.01 | 0.02  | 0.008 | 0.08 |
| WCST change    | Grim AA        | 0.02  | 0.021 | 0.06 | 0.02  | 0.022 | 0.07 | 0.02  | 0.065 | 0.23 |
| WCST change    | PCGrim AA      | 0.02  | 0.065 | 0.14 | 0.02  | 0.103 | 0.21 | 0.01  | 0.551 | 0.79 |
| WCST change    | DunedinPACE AA | 0.83  | 0.008 | 0.03 | 0.86  | 0.013 | 0.05 | 0.94  | 0.010 | 0.08 |
| PPT RLB change | Horvath AA     | 0.00  | 0.099 | 0.20 | 0.00  | 0.064 | 0.16 | 0.00  | 0.059 | 0.23 |
| PPT RLB change | PCHorvath AA   | 0.00  | 0.078 | 0.16 | 0.00  | 0.073 | 0.17 | 0.00  | 0.081 | 0.23 |
| PPT RLB change | Hannum AA      | 0.00  | 0.132 | 0.25 | 0.00  | 0.125 | 0.24 | 0.00  | 0.199 | 0.40 |
| PPT RLB change | PCHannum AA    | 0.00  | 0.110 | 0.22 | 0.00  | 0.099 | 0.21 | 0.00  | 0.100 | 0.25 |
| PPT RLB change | EEAA           | 0.00  | 0.077 | 0.16 | 0.00  | 0.093 | 0.20 | 0.00  | 0.138 | 0.33 |
| PPT RLB change | IEAA           | 0.00  | 0.155 | 0.28 | 0.00  | 0.084 | 0.18 | 0.00  | 0.113 | 0.28 |
| PPT RLB change | ENP AA         | 0.00  | 0.007 | 0.03 | 0.00  | 0.007 | 0.04 | 0.00  | 0.009 | 0.08 |
| PPT RLB change | BLUP AA        | 0.00  | 0.306 | 0.46 | 0.00  | 0.126 | 0.24 | 0.00  | 0.153 | 0.35 |
| PPT RLB change | Pheno AA       | 0.00  | 0.268 | 0.43 | 0.00  | 0.199 | 0.34 | 0.00  | 0.253 | 0.47 |
| PPT RLB change | PCPheno AA     | 0.00  | 0.067 | 0.15 | 0.00  | 0.047 | 0.13 | 0.00  | 0.087 | 0.24 |
| PPT RLB change | Grim AA        | 0.00  | 0.271 | 0.43 | 0.00  | 0.936 | 0.95 | 0.00  | 0.924 | 0.97 |
| PPT RLB change | PCGrim AA      | 0.00  | 0.713 | 0.83 | 0.00  | 0.336 | 0.51 | 0.00  | 0.477 | 0.70 |
| PPT RLB change | DunedinPACE AA | 0.03  | 0.632 | 0.75 | 0.01  | 0.894 | 0.94 | -0.01 | 0.938 | 0.98 |

|               |                |       |       |      |       |       |      |       |       |      |
|---------------|----------------|-------|-------|------|-------|-------|------|-------|-------|------|
| PPT AS change | Horvath AA     | 0.00  | 0.356 | 0.53 | 0.00  | 0.286 | 0.46 | 0.00  | 0.315 | 0.53 |
| PPT AS change | PCHorvath AA   | 0.00  | 0.835 | 0.90 | 0.00  | 0.811 | 0.94 | 0.00  | 0.822 | 0.93 |
| PPT AS change | Hannum AA      | 0.00  | 0.727 | 0.83 | 0.00  | 0.938 | 0.95 | 0.00  | 0.791 | 0.93 |
| PPT AS change | PCHannum AA    | 0.00  | 0.828 | 0.90 | 0.00  | 0.684 | 0.85 | 0.00  | 0.657 | 0.87 |
| PPT AS change | EEAA           | 0.00  | 0.723 | 0.83 | 0.00  | 0.890 | 0.94 | 0.00  | 0.804 | 0.93 |
| PPT AS change | IEAA           | 0.00  | 0.381 | 0.56 | 0.00  | 0.310 | 0.49 | 0.00  | 0.279 | 0.49 |
| PPT AS change | ENP AA         | 0.00  | 0.667 | 0.79 | 0.00  | 0.605 | 0.80 | 0.00  | 0.666 | 0.88 |
| PPT AS change | BLUP AA        | 0.00  | 0.957 | 0.96 | 0.00  | 0.852 | 0.94 | 0.00  | 0.953 | 0.98 |
| PPT AS change | Pheno AA       | 0.00  | 0.675 | 0.79 | 0.00  | 0.917 | 0.95 | 0.00  | 0.961 | 0.98 |
| PPT AS change | PCPheno AA     | 0.00  | 0.599 | 0.75 | 0.00  | 0.810 | 0.94 | 0.00  | 0.918 | 0.97 |
| PPT AS change | Grim AA        | 0.00  | 0.192 | 0.33 | 0.00  | 0.979 | 0.98 | 0.00  | 0.610 | 0.86 |
| PPT AS change | PCGrim AA      | 0.00  | 0.121 | 0.24 | 0.00  | 0.756 | 0.91 | 0.00  | 0.755 | 0.93 |
| PPT AS change | DunedinPACE AA | 0.04  | 0.008 | 0.03 | 0.03  | 0.087 | 0.19 | 0.02  | 0.306 | 0.53 |
| VSM change    | Horvath AA     | 0.00  | 0.109 | 0.22 | 0.00  | 0.156 | 0.29 | 0.00  | 0.156 | 0.35 |
| VSM change    | PCHorvath AA   | -0.01 | 0.037 | 0.09 | -0.01 | 0.051 | 0.13 | -0.01 | 0.064 | 0.23 |
| VSM change    | Hannum AA      | -0.01 | 0.000 | 0.01 | -0.01 | 0.001 | 0.01 | -0.01 | 0.001 | 0.03 |
| VSM change    | PCHannum AA    | -0.01 | 0.014 | 0.04 | -0.01 | 0.026 | 0.08 | -0.01 | 0.041 | 0.18 |
| VSM change    | EEAA           | -0.01 | 0.000 | 0.00 | -0.01 | 0.000 | 0.01 | -0.01 | 0.001 | 0.03 |
| VSM change    | IEAA           | 0.00  | 0.149 | 0.27 | 0.00  | 0.198 | 0.34 | 0.00  | 0.249 | 0.47 |
| VSM change    | ENP AA         | -0.01 | 0.000 | 0.01 | -0.01 | 0.000 | 0.01 | -0.01 | 0.000 | 0.01 |
| VSM change    | BLUP AA        | -0.01 | 0.000 | 0.00 | -0.01 | 0.000 | 0.01 | -0.01 | 0.000 | 0.01 |
| VSM change    | Pheno AA       | -0.01 | 0.004 | 0.02 | -0.01 | 0.009 | 0.05 | 0.00  | 0.029 | 0.16 |
| VSM change    | PCPheno AA     | -0.01 | 0.001 | 0.01 | -0.01 | 0.001 | 0.01 | -0.01 | 0.006 | 0.07 |
| VSM change    | Grim AA        | -0.01 | 0.000 | 0.01 | -0.01 | 0.001 | 0.01 | -0.01 | 0.004 | 0.06 |
| VSM change    | PCGrim AA      | -0.01 | 0.003 | 0.01 | -0.01 | 0.012 | 0.05 | -0.01 | 0.082 | 0.23 |
| VSM change    | DunedinPACE AA | -0.36 | 0.002 | 0.01 | -0.35 | 0.008 | 0.05 | -0.30 | 0.035 | 0.18 |
| VRM change    | Horvath AA     | -0.01 | 0.127 | 0.24 | -0.01 | 0.182 | 0.33 | 0.00  | 0.331 | 0.55 |
| VRM change    | PCHorvath AA   | -0.01 | 0.007 | 0.03 | -0.01 | 0.013 | 0.05 | -0.01 | 0.044 | 0.18 |
| VRM change    | Hannum AA      | -0.02 | 0.003 | 0.02 | -0.01 | 0.012 | 0.05 | -0.01 | 0.040 | 0.18 |
| VRM change    | PCHannum AA    | -0.01 | 0.006 | 0.03 | -0.01 | 0.014 | 0.06 | -0.01 | 0.049 | 0.20 |
| VRM change    | EEAA           | -0.01 | 0.002 | 0.01 | -0.01 | 0.007 | 0.04 | -0.01 | 0.037 | 0.18 |
| VRM change    | IEAA           | -0.01 | 0.174 | 0.30 | -0.01 | 0.223 | 0.37 | 0.00  | 0.364 | 0.57 |

|              |                |       |       |      |       |       |      |       |       |      |
|--------------|----------------|-------|-------|------|-------|-------|------|-------|-------|------|
| VRM change   | ENP AA         | -0.02 | 0.005 | 0.02 | -0.01 | 0.016 | 0.06 | -0.01 | 0.038 | 0.18 |
| VRM change   | BLUP AA        | -0.02 | 0.001 | 0.01 | -0.02 | 0.005 | 0.03 | -0.02 | 0.010 | 0.08 |
| VRM change   | Pheno AA       | 0.00  | 0.357 | 0.53 | 0.00  | 0.503 | 0.71 | 0.00  | 0.955 | 0.98 |
| VRM change   | PCPheno AA     | -0.02 | 0.001 | 0.01 | -0.02 | 0.001 | 0.01 | -0.01 | 0.012 | 0.09 |
| VRM change   | Grim AA        | -0.01 | 0.042 | 0.10 | -0.01 | 0.048 | 0.13 | -0.01 | 0.140 | 0.33 |
| VRM change   | PCGrim AA      | -0.02 | 0.036 | 0.09 | -0.02 | 0.032 | 0.10 | -0.01 | 0.197 | 0.40 |
| VRM change   | DunedinPACE AA | -0.17 | 0.449 | 0.63 | -0.15 | 0.541 | 0.74 | -0.07 | 0.790 | 0.93 |
| Speed change | Horvath AA     | -0.02 | 0.289 | 0.45 | -0.03 | 0.298 | 0.48 | -0.02 | 0.472 | 0.70 |
| Speed change | PCHorvath AA   | -0.08 | 0.003 | 0.01 | -0.08 | 0.003 | 0.02 | -0.08 | 0.005 | 0.06 |
| Speed change | Hannum AA      | -0.05 | 0.041 | 0.10 | -0.05 | 0.057 | 0.14 | -0.05 | 0.116 | 0.28 |
| Speed change | PCHannum AA    | -0.06 | 0.014 | 0.04 | -0.07 | 0.015 | 0.06 | -0.06 | 0.038 | 0.18 |
| Speed change | EEAA           | -0.05 | 0.029 | 0.08 | -0.05 | 0.035 | 0.10 | -0.04 | 0.100 | 0.25 |
| Speed change | IEAA           | -0.02 | 0.530 | 0.70 | -0.01 | 0.604 | 0.80 | -0.01 | 0.616 | 0.86 |
| Speed change | ENP AA         | -0.07 | 0.022 | 0.06 | -0.07 | 0.019 | 0.06 | -0.07 | 0.027 | 0.16 |
| Speed change | BLUP AA        | -0.09 | 0.007 | 0.03 | -0.09 | 0.009 | 0.05 | -0.08 | 0.014 | 0.09 |
| Speed change | Pheno AA       | -0.04 | 0.051 | 0.12 | -0.03 | 0.079 | 0.18 | -0.03 | 0.162 | 0.35 |
| Speed change | PCPheno AA     | -0.06 | 0.008 | 0.03 | -0.06 | 0.008 | 0.05 | -0.06 | 0.020 | 0.12 |
| Speed change | Grim AA        | -0.06 | 0.050 | 0.12 | -0.05 | 0.191 | 0.34 | -0.04 | 0.291 | 0.51 |
| Speed change | PCGrim AA      | -0.15 | 0.000 | 0.01 | -0.15 | 0.002 | 0.02 | -0.17 | 0.003 | 0.04 |
| Speed change | DunedinPACE AA | -1.29 | 0.245 | 0.41 | -1.19 | 0.338 | 0.51 | -0.64 | 0.631 | 0.87 |

Model 1(age, sex, education), Model 2 (Model 1, HT, DM, BMI, CVD, Apoe4, cholesterol, smoking), Model 3 ( Model2, CD8T,CD4T,NK,Bcell, Mono,Neu)

*Supplementary Table 8: Cross-sectional and longitudinal variability explained in visual memory by first and third generation clocks together*

|                        | <b>Cross-sectional</b> | <b>Longitudinal</b> |
|------------------------|------------------------|---------------------|
| BLUP AA                | 0.3%                   | 2.6%                |
| DunedinPACE AA         | 0.7%                   | 0.8%                |
| age_BL                 | 10.4%                  | 0.1%                |
| sex                    | 0.0%                   | 0.1%                |
| Education              | 5.0%                   | 4.5%                |
| Hypertension           | 0.1%                   | 0.0%                |
| Diabetes               | 0.0%                   | 0.0%                |
| CVD                    | 0.6%                   | 0.5%                |
| BMI                    | 0.0%                   | 0.2%                |
| Cholesterol            | 0.0%                   | 0.0%                |
| Smoking                | 0.5%                   | 0.1%                |
| apoe4_bi               | 0.0%                   | 0.0%                |
|                        |                        |                     |
| <b>R-squared model</b> | 0.25                   | 12%                 |

*Supplementary Table 9: Subgroup specific associations*

| PREDICTOR  | WCST |               |       |       |                |                |                  | VSM |       |       |                |                |                  |
|------------|------|---------------|-------|-------|----------------|----------------|------------------|-----|-------|-------|----------------|----------------|------------------|
|            | N    | Subgroup      | Beta  | SE    | <i>p</i> value | <i>part</i> R2 | <i>R</i> 2 Model | N   | Beta  | SE    | <i>p</i> value | <i>part</i> R2 | <i>R</i> 2 Model |
| BLUP AA    | 364  | Young         | -0.33 | 0.100 | 0.001          | 3.10%          | 9.07%            | 357 | -0.86 | 0.478 | 0.073          | 0.71%          | 17.00%           |
| BLUP AA    | 350  | Old           | -0.28 | 0.110 | 0.010          | 1.53%          | 4.05%            | 337 | -0.37 | 0.455 | 0.413          | 0.24%          | 16.26%           |
| BLUP AA    | 301  | Male          | -0.32 | 0.112 | 0.004          | 2.49%          | 6.41%            | 297 | -0.45 | 0.465 | 0.337          | 0.22%          | 29.95%           |
| BLUP AA    | 413  | Female        | -0.32 | 0.100 | 0.002          | 2.20%          | 5.14%            | 397 | -0.95 | 0.474 | 0.045          | 0.84%          | 21.42%           |
| BLUP AA    | 486  | Low_Ed        | -0.40 | 0.095 | 0.000          | 2.97%          | 7.87%            | 466 | -0.62 | 0.379 | 0.103          | 0.47%          | 21.19%           |
| BLUP AA    | 228  | High_Ed       | -0.15 | 0.109 | 0.168          | 0.99%          | 7.06%            | 228 | -1.12 | 0.661 | 0.091          | 1.05%          | 23.96%           |
| BLUP AA    | 217  | Normotensive  | -0.28 | 0.111 | 0.012          | 3.06%          | 8.86%            | 213 | -1.22 | 0.572 | 0.034          | 1.86%          | 23.45%           |
| BLUP AA    | 497  | Hypertensive  | -0.30 | 0.096 | 0.002          | 2.07%          | 4.92%            | 481 | -0.40 | 0.408 | 0.322          | 0.21%          | 22.14%           |
| BLUP AA    | 253  | Normal weight | -0.33 | 0.116 | 0.005          | 3.55%          | 11.93%           | 247 | -2.10 | 0.585 | 0.000          | 4.50%          | 24.44%           |
| BLUP AA    | 461  | Overweight    | -0.29 | 0.095 | 0.002          | 1.83%          | 4.51%            | 447 | 0.02  | 0.400 | 0.962          | 0.00%          | 27.35%           |
| BLUP AA    | 424  | No_CVD        | -0.28 | 0.074 | 0.000          | 2.99%          | 6.02%            | 415 | -0.61 | 0.400 | 0.129          | 0.39%          | 26.32%           |
| BLUP AA    | 290  | CVD           | -0.37 | 0.155 | 0.018          | 2.12%          | 5.26%            | 279 | -0.88 | 0.586 | 0.133          | 0.88%          | 19.80%           |
| BLUP AA    | 435  | Never         | -0.31 | 0.104 | 0.003          | 2.09%          | 6.60%            | 421 | -1.19 | 0.441 | 0.007          | 1.34%          | 27.97%           |
| BLUP AA    | 201  | Former        | -0.32 | 0.116 | 0.006          | 3.67%          | 7.14%            | 196 | -0.24 | 0.622 | 0.702          | 0.05%          | 21.75%           |
| BLUP AA    | 78   | Current       | -0.28 | 0.219 | 0.197          | 2.15%          | 10.88%           | 77  | 0.09  | 0.862 | 0.915          | 0.02%          | 31.47%           |
| BLUP AA    | 636  | Nondiabetic   | -0.37 | 0.082 | 0.000          | 3.19%          | 5.64%            | 622 | -0.97 | 0.358 | 0.007          | 0.91%          | 24.50%           |
| BLUP AA    | 78   | Diabetic      | 0.00  | 0.152 | 0.984          | 0.00%          | 8.76%            | 72  | 0.32  | 0.918 | 0.732          | 0.27%          | 28.25%           |
| BLUP AA    | 507  | WMHSC_0_1     | -0.38 | 0.088 | 0.000          | 3.30%          | 7.34%            | 495 | -0.53 | 0.382 | 0.166          | 0.31%          | 21.93%           |
| BLUP AA    | 162  | WMHSC_2_3     | -0.07 | 0.143 | 0.642          | 0.22%          | 5.32%            | 154 | -1.30 | 0.780 | 0.098          | 1.60%          | 27.79%           |
| PCPheno AA | 364  | Young         | -0.35 | 0.083 | 0.000          | 5.67%          | 10.64%           | 357 | -0.89 | 0.401 | 0.027          | 1.22%          | 17.40%           |
| PCPheno AA | 350  | Old           | -0.19 | 0.080 | 0.019          | 1.32%          | 3.75%            | 337 | -0.16 | 0.302 | 0.596          | 0.09%          | 16.16%           |
| PCPheno AA | 301  | Male          | -0.31 | 0.087 | 0.000          | 3.97%          | 7.78%            | 297 | -0.33 | 0.334 | 0.325          | 0.31%          | 29.96%           |
| PCPheno AA | 413  | Female        | -0.24 | 0.079 | 0.003          | 2.17%          | 4.91%            | 397 | -0.69 | 0.375 | 0.065          | 0.81%          | 21.29%           |

|            |     |               |       |       |       |       |        |     |       |       |       |       |        |
|------------|-----|---------------|-------|-------|-------|-------|--------|-----|-------|-------|-------|-------|--------|
| PCPheno AA | 486 | Low_Ed        | -0.29 | 0.073 | 0.000 | 2.83% | 7.49%  | 466 | -0.53 | 0.295 | 0.071 | 0.74% | 21.30% |
| PCPheno AA | 228 | High_Ed       | -0.21 | 0.088 | 0.016 | 3.51% | 8.72%  | 228 | -0.55 | 0.465 | 0.236 | 0.51% | 23.45% |
| PCPheno AA | 217 | Normotensive  | -0.21 | 0.087 | 0.016 | 3.74% | 8.62%  | 213 | -1.17 | 0.450 | 0.010 | 2.98% | 24.28% |
| PCPheno AA | 497 | Hypertensive  | -0.26 | 0.075 | 0.000 | 2.68% | 5.37%  | 481 | -0.21 | 0.299 | 0.491 | 0.12% | 22.05% |
| PCPheno AA | 253 | Normal weight | -0.29 | 0.097 | 0.003 | 5.16% | 12.33% | 247 | -1.01 | 0.504 | 0.046 | 1.74% | 21.62% |
| PCPheno AA | 461 | Overweight    | -0.23 | 0.072 | 0.001 | 2.21% | 4.72%  | 447 | -0.29 | 0.285 | 0.308 | 0.26% | 27.53% |
| PCPheno AA | 424 | No_CVD        | -0.23 | 0.059 | 0.000 | 3.14% | 6.07%  | 415 | -0.71 | 0.299 | 0.017 | 1.24% | 26.93% |
| PCPheno AA | 290 | CVD           | -0.31 | 0.114 | 0.008 | 2.95% | 5.77%  | 279 | -0.09 | 0.439 | 0.832 | 0.02% | 19.13% |
| PCPheno AA | 435 | Never         | -0.29 | 0.081 | 0.000 | 3.64% | 7.43%  | 421 | -0.92 | 0.350 | 0.009 | 1.38% | 27.92% |
| PCPheno AA | 201 | Former        | -0.17 | 0.087 | 0.047 | 2.04% | 5.31%  | 196 | -0.08 | 0.408 | 0.838 | 0.02% | 21.70% |
| PCPheno AA | 78  | Current       | -0.28 | 0.169 | 0.099 | 2.48% | 12.29% | 77  | -0.05 | 0.668 | 0.937 | 0.01% | 31.47% |
| PCPheno AA | 636 | Nondiabetic   | -0.27 | 0.065 | 0.000 | 3.19% | 5.13%  | 622 | -0.60 | 0.269 | 0.027 | 0.73% | 24.21% |
| PCPheno AA | 78  | Diabetic      | -0.23 | 0.106 | 0.031 | 4.40% | 15.01% | 72  | -0.41 | 0.687 | 0.553 | 0.27% | 28.54% |
| PCPheno AA | 507 | WMHSC_0_1     | -0.27 | 0.073 | 0.000 | 3.08% | 6.56%  | 495 | -0.38 | 0.314 | 0.232 | 0.35% | 21.85% |
| PCPheno AA | 162 | WMHSC_2_3     | -0.26 | 0.094 | 0.006 | 4.78% | 9.90%  | 154 | -0.51 | 0.436 | 0.243 | 0.81% | 27.08% |
| PCGrim AA  | 364 | Young         | -0.32 | 0.162 | 0.050 | 1.03% | 7.23%  | 357 | -1.09 | 0.787 | 0.167 | 0.79% | 16.68% |
| PCGrim AA  | 350 | Old           | -0.11 | 0.167 | 0.501 | 0.11% | 2.29%  | 337 | -0.27 | 0.664 | 0.687 | 0.07% | 16.13% |
| PCGrim AA  | 301 | Male          | -0.15 | 0.172 | 0.368 | 0.22% | 4.01%  | 297 | -0.37 | 0.700 | 0.599 | 0.12% | 29.79% |
| PCGrim AA  | 413 | Female        | -0.21 | 0.158 | 0.175 | 0.42% | 3.24%  | 397 | -0.88 | 0.751 | 0.242 | 0.51% | 20.87% |
| PCGrim AA  | 486 | Low_Ed        | -0.17 | 0.147 | 0.246 | 0.22% | 4.76%  | 466 | -0.38 | 0.598 | 0.525 | 0.14% | 20.80% |
| PCGrim AA  | 228 | High_Ed       | -0.34 | 0.173 | 0.054 | 4.28% | 7.84%  | 228 | -1.27 | 0.991 | 0.202 | 1.12% | 23.53% |
| PCGrim AA  | 217 | Normotensive  | -0.35 | 0.169 | 0.041 | 3.46% | 7.91%  | 213 | -0.46 | 0.903 | 0.610 | 0.16% | 21.81% |
| PCGrim AA  | 497 | Hypertensive  | -0.07 | 0.151 | 0.629 | 0.04% | 2.99%  | 481 | -0.72 | 0.632 | 0.257 | 0.68% | 22.19% |
| PCGrim AA  | 253 | Normal weight | -0.42 | 0.190 | 0.028 | 2.43% | 10.82% | 247 | -0.74 | 1.010 | 0.465 | 0.25% | 20.46% |
| PCGrim AA  | 461 | Overweight    | -0.08 | 0.144 | 0.595 | 0.04% | 2.59%  | 447 | -0.46 | 0.594 | 0.442 | 0.31% | 27.45% |
| PCGrim AA  | 424 | No_CVD        | -0.20 | 0.119 | 0.093 | 0.74% | 3.30%  | 415 | -1.28 | 0.631 | 0.043 | 1.35% | 26.64% |
| PCGrim AA  | 290 | CVD           | -0.21 | 0.232 | 0.362 | 0.20% | 3.61%  | 279 | 0.34  | 0.882 | 0.699 | 0.04% | 19.17% |

|                |     |               |                   |       |       |       |        |     |                   |        |       |       |        |
|----------------|-----|---------------|-------------------|-------|-------|-------|--------|-----|-------------------|--------|-------|-------|--------|
| PCGrim AA      | 435 | Never         | -0.27             | 0.182 | 0.138 | 0.49% | 5.17%  | 421 | -0.92             | 0.791  | 0.246 | 0.32% | 26.93% |
| PCGrim AA      | 201 | Former        | -0.17             | 0.161 | 0.300 | 0.64% | 3.86%  | 196 | -0.47             | 0.828  | 0.569 | 0.17% | 21.82% |
| PCGrim AA      | 78  | Current       | -0.28             | 0.280 | 0.329 | 0.66% | 9.93%  | 77  | -0.76             | 1.093  | 0.491 | 0.52% | 31.96% |
| PCGrim AA      | 636 | Nondiabetic   | -0.19             | 0.129 | 0.136 | 0.44% | 2.88%  | 622 | -0.72             | 0.555  | 0.198 | 0.48% | 23.80% |
| PCGrim AA      | 78  | Diabetic      | -0.19             | 0.232 | 0.419 | 0.65% | 9.66%  | 72  | -0.67             | 1.459  | 0.649 | 0.17% | 28.36% |
| PCGrim AA      | 507 | WMHSC_0_1     | -0.21             | 0.144 | 0.144 | 0.32% | 4.28%  | 495 | -0.16             | 0.626  | 0.801 | 0.02% | 21.63% |
| PCGrim AA      | 162 | WMHSC_2_3     | -0.21             | 0.186 | 0.255 | 1.54% | 6.01%  | 154 | -1.32             | 0.956  | 0.171 | 1.59% | 27.35% |
| DunedinPACE AA | 364 | Young         | -10.41            | 4.129 | 0.012 | 2.18% | 7.87%  | 357 | -47.35            | 19.863 | 0.018 | 2.16% | 17.58% |
| DunedinPACE AA | 350 | Old           | -3.46             | 3.681 | 0.348 | 0.27% | 2.42%  | 337 | -21.51            | 15.238 | 0.159 | 0.88% | 16.60% |
| DunedinPACE AA | 301 | Male          | -9.79             | 4.152 | 0.019 | 1.82% | 5.56%  | 297 | -22.64            | 17.578 | 0.199 | 0.77% | 30.13% |
| DunedinPACE AA | 413 | Female        | -4.02             | 3.655 | 0.272 | 0.34% | 3.08%  | 397 | -45.24            | 17.241 | 0.009 | 1.80% | 21.99% |
| DunedinPACE AA | 217 | Normotensive  | -7.56             | 4.213 | 0.074 | 2.74% | 7.46%  | 213 | -48.13            | 22.307 | 0.032 | 2.24% | 23.48% |
| DunedinPACE AA | 497 | Hypertensive  | -5.47             | 3.487 | 0.117 | 0.48% | 3.43%  | 481 | -30.04            | 14.920 | 0.045 | 1.28% | 22.64% |
| DunedinPACE AA | 253 | Normal weight | -10.16            | 4.354 | 0.020 | 3.18% | 11.01% | 247 | -24.10            | 22.410 | 0.283 | 0.53% | 20.67% |
| DunedinPACE AA | 461 | Overweight    | -5.04             | 3.521 | 0.153 | 0.36% | 2.98%  | 447 | -38.14            | 14.960 | 0.011 | 1.78% | 28.43% |
| DunedinPACE AA | 486 | Low_Ed        | -3.95             | 3.555 | 0.267 | 0.23% | 4.74%  | 466 | -32.18            | 14.465 | 0.027 | 1.27% | 21.58% |
| DunedinPACE AA | 228 | High_Ed       | -13.44            | 3.873 | 0.001 | 7.97% | 11.21% | 228 | -40.54            | 23.593 | 0.087 | 2.21% | 23.99% |
| DunedinPACE AA | 424 | No_CVD        | -9.29             | 2.929 | 0.002 | 2.34% | 4.96%  | 415 | -52.24            | 15.808 | 0.001 | 2.75% | 27.85% |
| DunedinPACE AA | 290 | CVD           | -4.85             | 5.160 | 0.348 | 0.23% | 3.63%  | 279 | -12.12            | 19.869 | 0.542 | 0.21% | 19.23% |
| DunedinPACE AA | 435 | Never         | -4.74             | 4.019 | 0.239 | 0.39% | 4.99%  | 421 | -36.48            | 17.433 | 0.037 | 0.90% | 27.47% |
| DunedinPACE AA | 201 | Former        | -10.21            | 3.814 | 0.008 | 3.43% | 6.83%  | 196 | -24.97            | 20.777 | 0.231 | 0.88% | 22.29% |
| DunedinPACE AA | 78  | Current       | -7.37             | 8.162 | 0.369 | 0.77% | 9.73%  | 77  | -63.64            | 30.784 | 0.043 | 4.78% | 35.63% |
| DunedinPACE AA | 636 | Nondiabetic   | -5.68             | 2.993 | 0.058 | 0.85% | 3.09%  | 622 | -36.65            | 13.024 | 0.005 | 1.63% | 24.57% |
| DunedinPACE AA | 78  | Diabetic      | -12.27            | 5.960 | 0.043 | 4.43% | 14.27% | 72  | -20.69            | 40.093 | 0.608 | 0.18% | 28.43% |
| DunedinPACE AA | 507 | WMHSC_0_1     | -7.29             | 3.537 | 0.040 | 0.81% | 4.69%  | 495 | -29.99            | 15.301 | 0.051 | 1.23% | 22.24% |
| DunedinPACE AA | 162 | WMHSC_2_3     | -6.90             | 4.015 | 0.088 | 2.13% | 7.02%  | 154 | -47.29            | 22.074 | 0.034 | 3.40% | 28.69% |
|                |     |               | <b>TMT Change</b> |       |       |       |        |     | <b>VSM Change</b> |        |       |       |        |



|            | <b>N</b> | <b>Subgroup</b> | <b>Beta</b> | <b>SE</b> | <b>p value</b> | <b>part R2</b> | <b>R 2 Model</b> | <b>N</b> | <b>Beta</b> | <b>SE</b> | <b>p value</b> | <b>part R2</b> | <b>R 2 Model</b> |
|------------|----------|-----------------|-------------|-----------|----------------|----------------|------------------|----------|-------------|-----------|----------------|----------------|------------------|
| BLUP AA    | 276      | Young           | -0.04       | 0.016     | 0.012          | 1.97%          | 18.13%           | 275      | -0.02       | 0.005     | 0.002          | 3.14%          | 13.50%           |
| BLUP AA    | 187      | Old             | -0.03       | 0.027     | 0.283          | 0.69%          | 13.30%           | 182      | -0.01       | 0.005     | 0.028          | 2.63%          | 9.69%            |
| BLUP AA    | 209      | Male            | -0.02       | 0.019     | 0.251          | 0.70%          | 10.55%           | 209      | -0.01       | 0.005     | 0.046          | 1.91%          | 14.78%           |
| BLUP AA    | 254      | Female          | -0.04       | 0.022     | 0.083          | 1.18%          | 18.03%           | 248      | -0.02       | 0.005     | 0.000          | 5.39%          | 10.09%           |
| BLUP AA    | 302      | Low_Ed          | -0.05       | 0.018     | 0.006          | 2.98%          | 13.07%           | 296      | -0.02       | 0.004     | 0.000          | 5.08%          | 11.74%           |
| BLUP AA    | 161      | High_Ed         | -0.02       | 0.023     | 0.472          | 0.26%          | 15.46%           | 161      | -0.01       | 0.007     | 0.091          | 1.60%          | 12.73%           |
| BLUP AA    | 162      | Normotensive    | -0.03       | 0.024     | 0.289          | 0.58%          | 15.01%           | 162      | -0.02       | 0.006     | 0.012          | 3.92%          | 10.10%           |
| BLUP AA    | 301      | Hypertensive    | -0.04       | 0.018     | 0.057          | 1.31%          | 13.48%           | 295      | -0.01       | 0.004     | 0.003          | 2.80%          | 12.23%           |
| BLUP AA    | 163      | Normal weight   | -0.04       | 0.025     | 0.109          | 1.59%          | 18.78%           | 160      | -0.02       | 0.006     | 0.000          | 7.14%          | 21.49%           |
| BLUP AA    | 300      | Overweight      | -0.03       | 0.018     | 0.128          | 0.70%          | 12.07%           | 297      | -0.01       | 0.004     | 0.042          | 1.41%          | 9.89%            |
| BLUP AA    | 300      | No_CVD          | -0.01       | 0.017     | 0.402          | 0.21%          | 10.35%           | 298      | -0.01       | 0.004     | 0.020          | 1.81%          | 9.92%            |
| BLUP AA    | 163      | CVD             | -0.07       | 0.027     | 0.013          | 3.74%          | 16.83%           | 159      | -0.02       | 0.006     | 0.000          | 7.10%          | 17.01%           |
| BLUP AA    | 282      | Never           | -0.03       | 0.018     | 0.111          | 0.96%          | 13.74%           | 277      | -0.02       | 0.005     | 0.000          | 5.81%          | 15.79%           |
| BLUP AA    | 133      | Former          | -0.06       | 0.030     | 0.033          | 3.38%          | 15.20%           | 132      | -0.01       | 0.007     | 0.307          | 0.62%          | 5.45%            |
| BLUP AA    | 48       | Current         | 0.05        | 0.051     | 0.321          | 1.44%          | 36.98%           | 48       | -0.01       | 0.012     | 0.365          | 1.99%          | 22.00%           |
| BLUP AA    | 421      | Nondiabetic     | -0.05       | 0.015     | 0.002          | 2.15%          | 9.68%            | 418      | -0.02       | 0.004     | 0.000          | 3.41%          | 12.59%           |
| BLUP AA    | 42       | Diabetic        | 0.08        | 0.063     | 0.239          | 4.15%          | 17.34%           | 39       | -0.02       | 0.013     | 0.192          | 2.92%          | 10.17%           |
| BLUP AA    | 352      | WMHSC_0_1       | -0.03       | 0.016     | 0.044          | 1.24%          | 12.20%           | 347      | -0.01       | 0.004     | 0.001          | 2.94%          | 9.83%            |
| BLUP AA    | 97       | WMHSC_2_3       | -0.03       | 0.038     | 0.363          | 0.64%          | 23.74%           | 96       | -0.02       | 0.008     | 0.035          | 4.18%          | 23.01%           |
| PCPheno AA | 276      | Young           | -0.03       | 0.013     | 0.034          | 1.46%          | 17.57%           | 275      | -0.01       | 0.004     | 0.000          | 4.59%          | 14.44%           |
| PCPheno AA | 187      | Old             | -0.03       | 0.017     | 0.072          | 2.30%          | 14.33%           | 182      | 0.00        | 0.003     | 0.433          | 0.34%          | 7.40%            |
| PCPheno AA | 209      | Male            | -0.02       | 0.014     | 0.202          | 0.91%          | 10.69%           | 209      | 0.00        | 0.003     | 0.256          | 0.86%          | 13.61%           |
| PCPheno AA | 254      | Female          | -0.04       | 0.016     | 0.021          | 2.38%          | 18.82%           | 248      | -0.01       | 0.004     | 0.001          | 4.96%          | 9.10%            |
| PCPheno AA | 302      | Low_Ed          | -0.04       | 0.014     | 0.007          | 3.04%          | 12.96%           | 296      | -0.01       | 0.003     | 0.004          | 3.64%          | 9.59%            |
| PCPheno AA | 161      | High_Ed         | -0.02       | 0.015     | 0.302          | 0.80%          | 15.78%           | 161      | -0.01       | 0.004     | 0.223          | 0.99%          | 11.91%           |

|            |     |               |       |       |       |       |        |     |       |       |       |       |        |
|------------|-----|---------------|-------|-------|-------|-------|--------|-----|-------|-------|-------|-------|--------|
| PCPheno AA | 162 | Normotensive  | -0.04 | 0.019 | 0.057 | 1.94% | 16.43% | 162 | -0.02 | 0.005 | 0.000 | 8.30% | 14.10% |
| PCPheno AA | 301 | Hypertensive  | -0.02 | 0.013 | 0.068 | 1.39% | 13.39% | 295 | 0.00  | 0.003 | 0.178 | 0.74% | 10.05% |
| PCPheno AA | 163 | Normal weight | -0.04 | 0.022 | 0.108 | 1.81% | 18.79% | 160 | -0.01 | 0.005 | 0.030 | 3.15% | 16.66% |
| PCPheno AA | 300 | Overweight    | -0.02 | 0.012 | 0.039 | 1.49% | 12.66% | 297 | -0.01 | 0.003 | 0.027 | 1.73% | 10.13% |
| PCPheno AA | 300 | No_CVD        | -0.02 | 0.012 | 0.211 | 0.61% | 10.62% | 298 | -0.01 | 0.003 | 0.004 | 2.85% | 10.85% |
| PCPheno AA | 163 | CVD           | -0.05 | 0.020 | 0.010 | 4.18% | 17.10% | 159 | -0.01 | 0.004 | 0.137 | 1.36% | 10.89% |
| PCPheno AA | 282 | Never         | -0.03 | 0.013 | 0.018 | 2.55% | 14.72% | 277 | -0.01 | 0.003 | 0.000 | 4.66% | 14.33% |
| PCPheno AA | 133 | Former        | -0.03 | 0.019 | 0.135 | 1.62% | 13.58% | 132 | 0.00  | 0.004 | 0.938 | 0.01% | 4.63%  |
| PCPheno AA | 48  | Current       | 0.03  | 0.038 | 0.406 | 1.02% | 36.46% | 48  | -0.01 | 0.009 | 0.225 | 5.04% | 23.38% |
| PCPheno AA | 421 | Nondiabetic   | -0.03 | 0.010 | 0.001 | 2.65% | 9.74%  | 418 | -0.01 | 0.003 | 0.001 | 2.61% | 11.52% |
| PCPheno AA | 42  | Diabetic      | 0.02  | 0.051 | 0.658 | 1.34% | 13.93% | 39  | -0.01 | 0.011 | 0.562 | 0.55% | 5.42%  |
| PCPheno AA | 352 | WMHSC_0_1     | -0.03 | 0.013 | 0.047 | 1.39% | 12.18% | 347 | -0.01 | 0.003 | 0.002 | 3.17% | 9.52%  |
| PCPheno AA | 97  | WMHSC_2_3     | -0.03 | 0.020 | 0.110 | 2.08% | 25.30% | 96  | 0.00  | 0.004 | 0.369 | 0.82% | 19.53% |
| PCGrim AA  | 276 | Young         | -0.04 | 0.025 | 0.115 | 0.79% | 16.94% | 275 | -0.02 | 0.007 | 0.011 | 2.24% | 12.34% |
| PCGrim AA  | 187 | Old           | -0.08 | 0.040 | 0.037 | 3.00% | 14.88% | 182 | -0.01 | 0.008 | 0.288 | 0.72% | 7.68%  |
| PCGrim AA  | 209 | Male          | -0.03 | 0.030 | 0.403 | 0.29% | 10.27% | 209 | -0.01 | 0.008 | 0.381 | 0.81% | 13.38% |
| PCGrim AA  | 254 | Female        | -0.09 | 0.032 | 0.004 | 3.17% | 19.75% | 248 | -0.02 | 0.007 | 0.005 | 2.50% | 7.54%  |
| PCGrim AA  | 302 | Low_Ed        | -0.06 | 0.028 | 0.040 | 1.66% | 12.04% | 296 | -0.01 | 0.006 | 0.039 | 1.56% | 8.25%  |
| PCGrim AA  | 161 | High_Ed       | -0.05 | 0.032 | 0.114 | 2.18% | 16.59% | 161 | -0.01 | 0.009 | 0.182 | 1.44% | 12.09% |
| PCGrim AA  | 162 | Normotensive  | -0.08 | 0.037 | 0.027 | 2.42% | 17.14% | 162 | -0.02 | 0.009 | 0.055 | 2.25% | 8.54%  |
| PCGrim AA  | 301 | Hypertensive  | -0.04 | 0.027 | 0.174 | 0.72% | 12.95% | 295 | -0.01 | 0.006 | 0.122 | 1.09% | 10.23% |
| PCGrim AA  | 163 | Normal weight | -0.08 | 0.045 | 0.073 | 2.69% | 19.13% | 160 | -0.02 | 0.010 | 0.024 | 4.15% | 16.89% |
| PCGrim AA  | 300 | Overweight    | -0.04 | 0.025 | 0.090 | 0.90% | 12.24% | 297 | -0.01 | 0.006 | 0.174 | 0.53% | 9.16%  |
| PCGrim AA  | 300 | No_CVD        | -0.05 | 0.025 | 0.051 | 1.40% | 11.31% | 298 | -0.02 | 0.006 | 0.008 | 2.50% | 10.41% |
| PCGrim AA  | 163 | CVD           | -0.07 | 0.043 | 0.117 | 1.21% | 14.78% | 159 | -0.01 | 0.009 | 0.433 | 0.44% | 9.92%  |
| PCGrim AA  | 282 | Never         | -0.06 | 0.030 | 0.038 | 1.83% | 14.31% | 277 | -0.01 | 0.008 | 0.071 | 1.12% | 10.94% |
| PCGrim AA  | 133 | Former        | -0.04 | 0.042 | 0.384 | 0.76% | 12.52% | 132 | -0.01 | 0.009 | 0.236 | 1.41% | 5.73%  |

|                |          |                 |                   |           |                |                |                  |          |                     |           |                |                |                  |  |
|----------------|----------|-----------------|-------------------|-----------|----------------|----------------|------------------|----------|---------------------|-----------|----------------|----------------|------------------|--|
| PCGrim AA      | 48       | Current         | -0.09             | 0.055     | 0.120          | 4.31%          | 39.40%           | 48       | -0.02               | 0.013     | 0.147          | 5.48%          | 24.70%           |  |
| PCGrim AA      | 421      | Nondiabetic     | -0.06             | 0.022     | 0.003          | 1.90%          | 9.36%            | 418      | -0.02               | 0.006     | 0.006          | 1.92%          | 10.70%           |  |
| PCGrim AA      | 42       | Diabetic        | -0.01             | 0.104     | 0.955          | 0.01%          | 13.37%           | 39       | -0.01               | 0.020     | 0.741          | 0.23%          | 4.61%            |  |
| PCGrim AA      | 352      | WMHSC_0_1       | -0.04             | 0.025     | 0.077          | 0.97%          | 11.96%           | 347      | -0.01               | 0.006     | 0.046          | 1.56%          | 7.99%            |  |
| PCGrim AA      | 97       | WMHSC_2_3       | -0.09             | 0.049     | 0.073          | 2.71%          | 25.90%           | 96       | -0.01               | 0.010     | 0.387          | 0.88%          | 19.47%           |  |
| DunedinPACE AA | 276      | Young           | -1.17             | 0.653     | 0.075          | 1.03%          | 17.16%           | 275      | -0.60               | 0.192     | 0.002          | 4.09%          | 13.35%           |  |
| DunedinPACE AA | 187      | Old             | -1.03             | 0.942     | 0.277          | 1.34%          | 13.32%           | 182      | -0.04               | 0.177     | 0.833          | 0.04%          | 7.08%            |  |
| DunedinPACE AA | 209      | Male            | -0.85             | 0.768     | 0.271          | 0.53%          | 10.50%           | 209      | -0.11               | 0.192     | 0.561          | 0.27%          | 13.19%           |  |
| DunedinPACE AA | 254      | Female          | -1.35             | 0.776     | 0.083          | 1.55%          | 18.03%           | 248      | -0.64               | 0.183     | 0.001          | 4.78%          | 9.06%            |  |
| DunedinPACE AA | 162      | Normotensive    | -1.22             | 0.940     | 0.195          | 0.87%          | 15.33%           | 162      | -0.57               | 0.235     | 0.016          | 4.27%          | 9.84%            |  |
| DunedinPACE AA | 301      | Hypertensive    | -0.97             | 0.680     | 0.155          | 0.96%          | 13.00%           | 295      | -0.23               | 0.163     | 0.165          | 1.16%          | 10.09%           |  |
| DunedinPACE AA | 163      | Normal weight   | -0.52             | 1.058     | 0.622          | 0.26%          | 17.51%           | 160      | -0.30               | 0.242     | 0.217          | 1.61%          | 14.83%           |  |
| DunedinPACE AA | 300      | Overweight      | -1.20             | 0.645     | 0.065          | 1.42%          | 12.41%           | 297      | -0.35               | 0.161     | 0.030          | 1.78%          | 10.07%           |  |
| DunedinPACE AA | 302      | Low_Ed          | -0.95             | 0.721     | 0.187          | 0.71%          | 11.28%           | 296      | -0.31               | 0.160     | 0.058          | 1.58%          | 8.02%            |  |
| DunedinPACE AA | 161      | High_Ed         | -1.61             | 0.821     | 0.052          | 3.57%          | 17.31%           | 161      | -0.39               | 0.242     | 0.108          | 2.77%          | 12.57%           |  |
| DunedinPACE AA | 300      | No_CVD          | -1.41             | 0.678     | 0.038          | 1.94%          | 11.47%           | 298      | -0.59               | 0.172     | 0.001          | 4.33%          | 11.84%           |  |
| DunedinPACE AA | 163      | CVD             | -0.62             | 0.935     | 0.509          | 0.18%          | 13.63%           | 159      | -0.03               | 0.204     | 0.867          | 0.02%          | 9.56%            |  |
| DunedinPACE AA | 282      | Never           | -0.99             | 0.713     | 0.167          | 1.38%          | 13.54%           | 277      | -0.40               | 0.187     | 0.031          | 2.01%          | 11.40%           |  |
| DunedinPACE AA | 133      | Former          | -0.76             | 1.058     | 0.475          | 0.52%          | 12.34%           | 132      | -0.22               | 0.228     | 0.345          | 0.94%          | 5.33%            |  |
| DunedinPACE AA | 48       | Current         | -2.04             | 1.617     | 0.215          | 2.17%          | 37.92%           | 48       | -0.59               | 0.382     | 0.133          | 5.83%          | 25.00%           |  |
| DunedinPACE AA | 421      | Nondiabetic     | -1.33             | 0.543     | 0.015          | 1.71%          | 8.76%            | 418      | -0.40               | 0.137     | 0.003          | 2.62%          | 10.91%           |  |
| DunedinPACE AA | 42       | Diabetic        | 2.39              | 2.609     | 0.368          | 2.20%          | 15.71%           | 39       | 0.15                | 0.525     | 0.779          | 0.48%          | 4.50%            |  |
| DunedinPACE AA | 352      | WMHSC_0_1       | -0.81             | 0.655     | 0.217          | 0.45%          | 11.54%           | 347      | -0.42               | 0.165     | 0.011          | 2.90%          | 8.66%            |  |
| DunedinPACE AA | 97       | WMHSC_2_3       | -1.59             | 1.105     | 0.153          | 2.61%          | 24.84%           | 96       | -0.21               | 0.230     | 0.360          | 1.65%          | 19.56%           |  |
|                |          |                 | <b>VRM Change</b> |           |                |                |                  |          | <b>Speed Change</b> |           |                |                |                  |  |
|                | <b>N</b> | <b>Subgroup</b> | <b>Beta</b>       | <b>SE</b> | <b>p value</b> | <b>part R2</b> | <b>R 2 Model</b> | <b>N</b> | <b>Beta</b>         | <b>SE</b> | <b>p value</b> | <b>part R2</b> | <b>R 2 Model</b> |  |

|            |     |               |       |       |       |       |        |     |       |       |       |       |        |
|------------|-----|---------------|-------|-------|-------|-------|--------|-----|-------|-------|-------|-------|--------|
| BLUP AA    | 275 | Young         | -0.02 | 0.009 | 0.022 | 1.51% | 21.06% | 276 | -0.09 | 0.047 | 0.045 | 1.17% | 5.00%  |
| BLUP AA    | 182 | Old           | -0.02 | 0.010 | 0.062 | 1.71% | 25.07% | 183 | -0.09 | 0.042 | 0.031 | 3.75% | 14.19% |
| BLUP AA    | 209 | Male          | -0.02 | 0.009 | 0.067 | 1.56% | 24.98% | 206 | -0.08 | 0.043 | 0.072 | 2.17% | 8.34%  |
| BLUP AA    | 248 | Female        | -0.02 | 0.010 | 0.016 | 1.85% | 19.96% | 253 | -0.08 | 0.051 | 0.119 | 1.09% | 3.98%  |
| BLUP AA    | 296 | Low_Ed        | -0.02 | 0.007 | 0.003 | 3.06% | 10.77% | 300 | -0.05 | 0.040 | 0.236 | 0.54% | 4.68%  |
| BLUP AA    | 161 | High_Ed       | -0.02 | 0.013 | 0.147 | 1.01% | 12.55% | 159 | -0.18 | 0.057 | 0.002 | 5.37% | 18.75% |
| BLUP AA    | 162 | Normotensive  | -0.02 | 0.011 | 0.033 | 2.12% | 22.94% | 162 | -0.08 | 0.053 | 0.132 | 1.38% | 9.45%  |
| BLUP AA    | 295 | Hypertensive  | -0.02 | 0.008 | 0.044 | 1.20% | 21.61% | 297 | -0.10 | 0.042 | 0.013 | 1.98% | 6.91%  |
| BLUP AA    | 160 | Normal weight | -0.03 | 0.011 | 0.023 | 2.37% | 28.54% | 162 | -0.15 | 0.058 | 0.012 | 5.26% | 14.37% |
| BLUP AA    | 297 | Overweight    | -0.02 | 0.008 | 0.056 | 1.26% | 19.44% | 297 | -0.04 | 0.040 | 0.323 | 0.32% | 2.31%  |
| BLUP AA    | 298 | No_CVD        | -0.01 | 0.008 | 0.120 | 0.84% | 20.81% | 297 | -0.08 | 0.040 | 0.051 | 1.55% | 3.95%  |
| BLUP AA    | 159 | CVD           | -0.03 | 0.011 | 0.005 | 3.77% | 23.42% | 162 | -0.11 | 0.057 | 0.063 | 1.84% | 9.77%  |
| BLUP AA    | 277 | Never         | -0.02 | 0.008 | 0.007 | 1.90% | 23.70% | 280 | -0.08 | 0.041 | 0.059 | 1.27% | 3.68%  |
| BLUP AA    | 132 | Former        | -0.02 | 0.013 | 0.100 | 1.65% | 17.14% | 131 | -0.16 | 0.067 | 0.017 | 4.22% | 11.98% |
| BLUP AA    | 48  | Current       | -0.03 | 0.024 | 0.228 | 2.37% | 41.32% | 48  | -0.03 | 0.102 | 0.784 | 0.18% | 27.13% |
| BLUP AA    | 418 | Nondiabetic   | -0.02 | 0.007 | 0.001 | 2.08% | 23.18% | 419 | -0.09 | 0.036 | 0.009 | 1.50% | 4.34%  |
| BLUP AA    | 39  | Diabetic      | -0.01 | 0.019 | 0.691 | 0.40% | 14.49% | 40  | -0.12 | 0.087 | 0.188 | 5.47% | 35.80% |
| BLUP AA    | 347 | WMHSC_0_1     | -0.02 | 0.008 | 0.028 | 1.26% | 21.23% | 351 | -0.06 | 0.038 | 0.100 | 0.71% | 3.74%  |
| BLUP AA    | 96  | WMHSC_2_3     | -0.02 | 0.013 | 0.082 | 2.66% | 34.14% | 94  | -0.15 | 0.058 | 0.013 | 6.55% | 19.31% |
| PCPheno AA | 275 | Young         | -0.02 | 0.007 | 0.003 | 2.52% | 22.12% | 276 | -0.07 | 0.038 | 0.074 | 0.88% | 4.69%  |
| PCPheno AA | 182 | Old           | -0.01 | 0.006 | 0.078 | 1.48% | 24.90% | 183 | -0.06 | 0.026 | 0.015 | 4.03% | 14.85% |
| PCPheno AA | 209 | Male          | -0.01 | 0.006 | 0.132 | 1.14% | 24.56% | 206 | -0.05 | 0.031 | 0.087 | 1.37% | 8.19%  |
| PCPheno AA | 248 | Female        | -0.02 | 0.007 | 0.003 | 3.39% | 20.96% | 253 | -0.07 | 0.037 | 0.046 | 1.80% | 4.59%  |
| PCPheno AA | 296 | Low_Ed        | -0.02 | 0.006 | 0.002 | 3.71% | 11.13% | 300 | -0.03 | 0.031 | 0.261 | 0.35% | 4.64%  |
| PCPheno AA | 161 | High_Ed       | -0.01 | 0.009 | 0.129 | 1.35% | 12.67% | 159 | -0.11 | 0.038 | 0.003 | 4.87% | 18.10% |
| PCPheno AA | 162 | Normotensive  | -0.03 | 0.009 | 0.000 | 6.40% | 27.37% | 162 | -0.06 | 0.042 | 0.187 | 0.94% | 9.13%  |
| PCPheno AA | 295 | Hypertensive  | -0.01 | 0.006 | 0.135 | 0.75% | 21.10% | 297 | -0.08 | 0.029 | 0.009 | 1.92% | 7.09%  |

|            |     |               |       |       |       |       |        |     |       |       |       |       |        |
|------------|-----|---------------|-------|-------|-------|-------|--------|-----|-------|-------|-------|-------|--------|
| PCPheno AA | 160 | Normal weight | -0.02 | 0.010 | 0.055 | 1.78% | 27.81% | 162 | -0.11 | 0.052 | 0.029 | 3.38% | 13.45% |
| PCPheno AA | 297 | Overweight    | -0.01 | 0.005 | 0.007 | 2.30% | 20.43% | 297 | -0.05 | 0.026 | 0.079 | 0.84% | 3.03%  |
| PCPheno AA | 298 | No_CVD        | -0.02 | 0.006 | 0.008 | 2.21% | 22.06% | 297 | -0.05 | 0.029 | 0.065 | 1.39% | 3.81%  |
| PCPheno AA | 159 | CVD           | -0.02 | 0.008 | 0.055 | 1.75% | 21.24% | 162 | -0.08 | 0.042 | 0.051 | 1.76% | 9.98%  |
| PCPheno AA | 277 | Never         | -0.02 | 0.006 | 0.000 | 3.48% | 25.27% | 280 | -0.05 | 0.031 | 0.131 | 0.86% | 3.22%  |
| PCPheno AA | 132 | Former        | 0.00  | 0.008 | 0.593 | 0.26% | 15.45% | 131 | -0.11 | 0.042 | 0.008 | 4.33% | 12.97% |
| PCPheno AA | 48  | Current       | -0.02 | 0.018 | 0.325 | 2.42% | 40.54% | 48  | 0.06  | 0.076 | 0.464 | 0.85% | 28.05% |
| PCPheno AA | 418 | Nondiabetic   | -0.02 | 0.005 | 0.001 | 2.15% | 23.32% | 419 | -0.07 | 0.025 | 0.008 | 1.44% | 4.41%  |
| PCPheno AA | 39  | Diabetic      | -0.02 | 0.016 | 0.280 | 1.79% | 17.68% | 40  | -0.07 | 0.069 | 0.298 | 2.44% | 34.27% |
| PCPheno AA | 347 | WMHSC_0_1     | -0.02 | 0.006 | 0.002 | 2.31% | 22.29% | 351 | -0.06 | 0.031 | 0.041 | 0.95% | 4.15%  |
| PCPheno AA | 96  | WMHSC_2_3     | -0.01 | 0.007 | 0.254 | 1.35% | 32.76% | 94  | -0.07 | 0.030 | 0.022 | 5.85% | 18.41% |
| PCGrim AA  | 275 | Young         | -0.02 | 0.014 | 0.189 | 0.37% | 19.98% | 276 | -0.17 | 0.071 | 0.020 | 1.67% | 5.49%  |
| PCGrim AA  | 182 | Old           | -0.03 | 0.014 | 0.035 | 2.26% | 25.49% | 183 | -0.13 | 0.063 | 0.038 | 4.64% | 14.02% |
| PCGrim AA  | 209 | Male          | -0.02 | 0.013 | 0.221 | 0.71% | 24.27% | 206 | -0.17 | 0.067 | 0.014 | 2.70% | 9.64%  |
| PCGrim AA  | 248 | Female        | -0.03 | 0.015 | 0.057 | 1.12% | 19.24% | 253 | -0.17 | 0.073 | 0.026 | 2.65% | 4.99%  |
| PCGrim AA  | 296 | Low_Ed        | -0.01 | 0.012 | 0.203 | 0.53% | 8.54%  | 300 | -0.12 | 0.062 | 0.056 | 1.02% | 5.43%  |
| PCGrim AA  | 161 | High_Ed       | -0.03 | 0.018 | 0.056 | 1.77% | 13.46% | 159 | -0.19 | 0.081 | 0.023 | 4.95% | 16.03% |
| PCGrim AA  | 162 | Normotensive  | -0.03 | 0.018 | 0.139 | 0.97% | 21.71% | 162 | -0.14 | 0.081 | 0.087 | 1.53% | 9.85%  |
| PCGrim AA  | 295 | Hypertensive  | -0.02 | 0.012 | 0.143 | 0.76% | 21.08% | 297 | -0.17 | 0.062 | 0.006 | 2.64% | 7.38%  |
| PCGrim AA  | 160 | Normal weight | -0.03 | 0.020 | 0.086 | 1.73% | 27.46% | 162 | -0.20 | 0.106 | 0.065 | 4.11% | 12.65% |
| PCGrim AA  | 297 | Overweight    | -0.02 | 0.011 | 0.156 | 0.60% | 18.97% | 297 | -0.13 | 0.054 | 0.015 | 1.63% | 3.99%  |
| PCGrim AA  | 298 | No_CVD        | -0.02 | 0.012 | 0.058 | 1.00% | 21.14% | 297 | -0.12 | 0.060 | 0.042 | 1.78% | 4.05%  |
| PCGrim AA  | 159 | CVD           | -0.02 | 0.018 | 0.267 | 0.57% | 19.91% | 162 | -0.25 | 0.089 | 0.005 | 3.82% | 12.41% |
| PCGrim AA  | 277 | Never         | -0.03 | 0.014 | 0.021 | 1.15% | 23.14% | 280 | -0.18 | 0.069 | 0.012 | 1.97% | 4.67%  |
| PCGrim AA  | 132 | Former        | -0.01 | 0.018 | 0.466 | 0.52% | 15.63% | 131 | -0.20 | 0.091 | 0.027 | 2.97% | 11.36% |
| PCGrim AA  | 48  | Current       | -0.01 | 0.027 | 0.796 | 0.13% | 39.05% | 48  | 0.00  | 0.113 | 0.988 | 0.00% | 26.98% |
| PCGrim AA  | 418 | Nondiabetic   | -0.02 | 0.011 | 0.039 | 0.70% | 21.96% | 419 | -0.15 | 0.053 | 0.005 | 1.79% | 4.58%  |

|                |     |               |       |       |       |       |        |     |       |       |       |       |        |
|----------------|-----|---------------|-------|-------|-------|-------|--------|-----|-------|-------|-------|-------|--------|
| PCGrim AA      | 39  | Diabetic      | -0.03 | 0.029 | 0.306 | 2.16% | 17.32% | 40  | -0.22 | 0.137 | 0.118 | 3.96% | 37.45% |
| PCGrim AA      | 347 | WMHSC_0_1     | -0.02 | 0.012 | 0.108 | 0.59% | 20.70% | 351 | -0.19 | 0.060 | 0.002 | 2.53% | 5.62%  |
| PCGrim AA      | 96  | WMHSC_2_3     | -0.03 | 0.018 | 0.088 | 2.95% | 34.06% | 94  | -0.14 | 0.076 | 0.068 | 4.01% | 16.46% |
| DunedinPACE AA | 275 | Young         | -0.42 | 0.361 | 0.249 | 0.37% | 19.85% | 276 | -2.08 | 1.879 | 0.269 | 0.34% | 3.98%  |
| DunedinPACE AA | 182 | Old           | 0.15  | 0.337 | 0.649 | 0.08% | 23.59% | 183 | -0.47 | 1.479 | 0.751 | 0.06% | 11.86% |
| DunedinPACE AA | 209 | Male          | 0.28  | 0.343 | 0.422 | 0.19% | 23.94% | 206 | -0.44 | 1.742 | 0.801 | 0.03% | 6.82%  |
| DunedinPACE AA | 248 | Female        | -0.68 | 0.359 | 0.059 | 1.19% | 19.21% | 253 | -1.97 | 1.797 | 0.273 | 0.55% | 3.48%  |
| DunedinPACE AA | 162 | Normotensive  | -0.08 | 0.450 | 0.863 | 0.02% | 20.57% | 162 | -1.57 | 2.079 | 0.451 | 0.40% | 8.41%  |
| DunedinPACE AA | 295 | Hypertensive  | -0.18 | 0.303 | 0.552 | 0.15% | 20.58% | 297 | -0.96 | 1.563 | 0.539 | 0.13% | 4.99%  |
| DunedinPACE AA | 160 | Normal weight | 0.33  | 0.470 | 0.490 | 0.18% | 26.22% | 162 | -1.73 | 2.480 | 0.487 | 0.32% | 10.91% |
| DunedinPACE AA | 297 | Overweight    | -0.27 | 0.299 | 0.358 | 0.32% | 18.63% | 297 | -1.77 | 1.437 | 0.220 | 0.42% | 2.49%  |
| DunedinPACE AA | 296 | Low_Ed        | -0.06 | 0.300 | 0.848 | 0.01% | 8.02%  | 300 | 0.47  | 1.569 | 0.766 | 0.04% | 4.24%  |
| DunedinPACE AA | 161 | High_Ed       | -0.42 | 0.465 | 0.372 | 0.55% | 11.77% | 159 | -1.91 | 2.123 | 0.370 | 0.79% | 13.49% |
| DunedinPACE AA | 298 | No_CVD        | -0.34 | 0.327 | 0.302 | 0.38% | 20.44% | 297 | -1.90 | 1.628 | 0.243 | 0.56% | 3.11%  |
| DunedinPACE AA | 159 | CVD           | 0.12  | 0.384 | 0.754 | 0.08% | 19.29% | 162 | 0.48  | 1.974 | 0.808 | 0.05% | 7.69%  |
| DunedinPACE AA | 277 | Never         | -0.21 | 0.333 | 0.525 | 0.07% | 21.71% | 280 | -1.82 | 1.667 | 0.275 | 0.35% | 2.83%  |
| DunedinPACE AA | 132 | Former        | -0.06 | 0.455 | 0.889 | 0.02% | 15.27% | 131 | -1.50 | 2.400 | 0.533 | 0.31% | 7.98%  |
| DunedinPACE AA | 48  | Current       | -0.58 | 0.777 | 0.457 | 1.08% | 39.86% | 48  | -1.13 | 3.273 | 0.733 | 0.31% | 27.22% |
| DunedinPACE AA | 418 | Nondiabetic   | -0.13 | 0.262 | 0.617 | 0.05% | 21.18% | 419 | -1.31 | 1.312 | 0.319 | 0.19% | 2.96%  |
| DunedinPACE AA | 39  | Diabetic      | -0.45 | 0.766 | 0.560 | 1.03% | 15.08% | 40  | 0.20  | 3.875 | 0.960 | 0.01% | 31.64% |
| DunedinPACE AA | 347 | WMHSC_0_1     | -0.24 | 0.309 | 0.434 | 0.21% | 20.23% | 351 | -2.66 | 1.564 | 0.090 | 0.72% | 3.78%  |
| DunedinPACE AA | 96  | WMHSC_2_3     | -0.24 | 0.402 | 0.553 | 0.33% | 31.98% | 94  | 0.38  | 1.773 | 0.832 | 0.05% | 12.99% |

*Supplementary Table 10: ApoE4 specific subgroup associations*

|                     | ApoE4 non-carriers |     |        |        |                |                | ApoE4 carriers   |     |        |        |                |                |        |
|---------------------|--------------------|-----|--------|--------|----------------|----------------|------------------|-----|--------|--------|----------------|----------------|--------|
|                     | PREDICTOR          | N   | Beta   | SE     | <i>p value</i> | <i>part R2</i> | <i>R 2 Model</i> | N   | Beta   | SE     | <i>p value</i> | <i>part R2</i> |        |
| <b>WCST</b>         | BLUP AA            | 580 | -0.28  | 0.084  | 0.001          | 1.87%          | 3.94%            | 134 | -0.38  | 0.151  | 0.012          | 5.28%          | 18.20% |
|                     | PCPheno AA         | 580 | -0.25  | 0.065  | 0.000          | 2.57%          | 4.56%            | 134 | -0.26  | 0.124  | 0.041          | 4.75%          | 16.74% |
|                     | PCGrim AA          | 580 | -0.22  | 0.129  | 0.088          | 0.49%          | 2.53%            | 134 | 0.03   | 0.250  | 0.913          | 0.02%          | 13.84% |
|                     | DunedinPACE AA     | 580 | -6.70  | 3.079  | 0.030          | 0.87%          | 2.83%            | 134 | -5.05  | 6.059  | 0.406          | 0.43%          | 14.32% |
| <b>VSM</b>          | BLUP AA            | 563 | -0.45  | 0.361  | 0.209          | 0.27%          | 24.20%           | 131 | -1.60  | 0.826  | 0.056          | 2.32%          | 30.72% |
|                     | PCPheno AA         | 563 | -0.32  | 0.267  | 0.228          | 0.30%          | 24.19%           | 131 | -1.14  | 0.677  | 0.095          | 2.53%          | 30.20% |
|                     | PCGrim AA          | 563 | -0.72  | 0.553  | 0.195          | 0.66%          | 24.22%           | 131 | -0.07  | 1.374  | 0.961          | 0.00%          | 28.54% |
|                     | DunedinPACE AA     | 563 | -33.18 | 13.353 | 0.013          | 1.63%          | 24.83%           | 131 | -40.26 | 33.584 | 0.233          | 1.00%          | 29.39% |
| <b>TMT change</b>   | BLUP AA            | 372 | -0.03  | 0.016  | 0.085          | 0.81%          | 12.73%           | 91  | -0.04  | 0.032  | 0.171          | 1.73%          | 25.26% |
|                     | PCPheno AA         | 372 | -0.03  | 0.012  | 0.030          | 1.41%          | 13.15%           | 91  | -0.03  | 0.025  | 0.306          | 1.64%          | 24.47% |
|                     | PCGrim AA          | 372 | -0.05  | 0.024  | 0.026          | 1.54%          | 13.22%           | 91  | -0.08  | 0.057  | 0.167          | 1.71%          | 25.29% |
|                     | DunedinPACE AA     | 372 | -0.84  | 0.602  | 0.163          | 0.71%          | 12.49%           | 91  | -2.43  | 1.345  | 0.075          | 3.96%          | 26.49% |
| <b>VSM change</b>   | BLUP AA            | 369 | -0.01  | 0.004  | 0.004          | 2.14%          | 8.90%            | 88  | -0.03  | 0.010  | 0.005          | 9.97%          | 23.63% |
|                     | PCPheno AA         | 369 | -0.01  | 0.003  | 0.027          | 1.29%          | 7.97%            | 88  | -0.02  | 0.007  | 0.021          | 11.46%         | 21.04% |
|                     | PCGrim AA          | 369 | -0.01  | 0.005  | 0.012          | 1.84%          | 8.35%            | 88  | 0.00   | 0.017  | 0.781          | 0.09%          | 15.39% |
|                     | DunedinPACE AA     | 369 | -0.39  | 0.140  | 0.005          | 2.56%          | 8.71%            | 88  | -0.05  | 0.417  | 0.904          | 0.03%          | 15.31% |
| <b>VRM change</b>   | BLUP AA            | 369 | -0.01  | 0.007  | 0.094          | 0.74%          | 19.59%           | 88  | -0.05  | 0.015  | 0.001          | 11.10%         | 39.76% |
|                     | PCPheno AA         | 369 | -0.01  | 0.005  | 0.022          | 1.28%          | 20.14%           | 88  | -0.03  | 0.012  | 0.011          | 10.29%         | 36.58% |
|                     | PCGrim AA          | 369 | -0.02  | 0.011  | 0.099          | 0.69%          | 19.57%           | 88  | -0.04  | 0.027  | 0.148          | 1.42%          | 32.73% |
|                     | DunedinPACE AA     | 369 | -0.19  | 0.272  | 0.483          | 0.13%          | 19.07%           | 88  | 0.12   | 0.665  | 0.857          | 0.04%          | 30.87% |
| <b>Speed change</b> | BLUP AA            | 369 | -0.06  | 0.035  | 0.118          | 0.75%          | 4.40%            | 90  | -0.23  | 0.089  | 0.010          | 7.72%          | 16.48% |
|                     | PCPheno AA         | 369 | -0.069 | 0.025  | 0.006          | 2.00%          | 5.76%            | 90  | -0.05  | 0.072  | 0.490          | 0.48%          | 9.62%  |
|                     | PCGrim AA          | 369 | -0.163 | 0.051  | 0.001          | 3.22%          | 6.46%            | 90  | -0.139 | 0.163  | 0.398          | 0.44%          | 9.89%  |
|                     | DunedinPACE AA     | 369 | -2.33  | 1.307  | 0.076          | 0.88%          | 4.59%            | 90  | 4.03   | 3.865  | 0.301          | 2.41%          | 10.31% |

*Supplementary Table 11: Variability explained by age acceleration measures compared to other risk factors in cognition*

| <b>WCST_BL</b>    |             |              |              |              | <b>Visual Memory</b> |              |              |              |              |
|-------------------|-------------|--------------|--------------|--------------|----------------------|--------------|--------------|--------------|--------------|
| Pred              | BLUP        | PCPheno      | PCGrim       | DunedinPACE  | Pred                 | BLUP         | PCPheno      | PCGrim       | DunedinPACE  |
| <b>AA</b>         | <b>2.3%</b> | <b>3.0%</b>  | <b>0.4%</b>  | <b>1.0%</b>  | age_BL               | 14.84%       | 14.85%       | 14.84%       | 14.87%       |
| Education         | 0.87%       | 0.70%        | 0.85%        | 0.80%        | Education            | 7.09%        | 7.07%        | 7.09%        | 7.01%        |
| age_BL            | 0.55%       | 0.52%        | 0.54%        | 0.52%        | <b>AA</b>            | <b>0.5%</b>  | <b>0.6%</b>  | <b>0.5%</b>  | <b>1.6%</b>  |
| CVD               | 0.55%       | 0.47%        | 0.51%        | 0.44%        | CVD                  | 0.83%        | 0.83%        | 0.81%        | 0.74%        |
| Diabetes          | 0.21%       | 0.28%        | 0.16%        | 0.20%        | Smoking              | 0.90%        | 0.88%        | 0.71%        | 0.57%        |
| Cholesterol       | 0.14%       | 0.04%        | 0.13%        | 0.06%        | Hypertension         | 0.21%        | 0.16%        | 0.18%        | 0.14%        |
| Smoking           | 0.03%       | 0.03%        | 0.09%        | 0.07%        | Diabetes             | 0.07%        | 0.06%        | 0.07%        | 0.03%        |
| BMI               | 0.01%       | 0.03%        | 0.03%        | 0.09%        | Cholesterol          | 0.01%        | 0.00%        | 0.01%        | 0.00%        |
| sex               | 0.05%       | 0.01%        | 0.09%        | 0.07%        | BMI                  | 0.03%        | 0.03%        | 0.02%        | 0.00%        |
| apoe4_bi          | 0.00%       | 0.00%        | 0.01%        | 0.01%        | apoe4_bi             | 0.00%        | 0.00%        | 0.00%        | 0.00%        |
| Hypertension      | 0.02%       | 0.00%        | 0.00%        | 0.00%        | sex                  | 0.01%        | 0.00%        | 0.01%        | 0.00%        |
|                   |             |              |              |              |                      |              |              |              |              |
| <b>TMT Change</b> |             |              |              |              | <b>VSM Change</b>    |              |              |              |              |
| Pred              | BLUP        | PCPheno      | PCGrim       | DunedinPACE  | Pred                 | BLUP         | PCPheno      | PCGrim       | DunedinPACE  |
| Diabetes          | 5.94%       | 5.91%        | 5.85%        | 5.93%        | Education            | 5.96%        | 5.79%        | 5.83%        | 5.74%        |
| Education         | 4.25%       | 4.20%        | 4.24%        | 4.17%        | <b>AA</b>            | <b>3.20%</b> | <b>2.31%</b> | <b>1.48%</b> | <b>2.08%</b> |
| <b>AA</b>         | <b>1.0%</b> | <b>1.56%</b> | <b>1.34%</b> | <b>0.97%</b> | CVD                  | 0.75%        | 0.74%        | 0.76%        | 0.64%        |
| CVD               | 1.46%       | 1.42%        | 1.43%        | 1.39%        | BMI                  | 0.36%        | 0.30%        | 0.17%        | 0.09%        |
| apoe4_bi          | 0.15%       | 0.16%        | 0.09%        | 0.09%        | Smoking              | 0.14%        | 0.20%        | 0.18%        | 0.12%        |
| Smoking           | 0.11%       | 0.13%        | 0.32%        | 0.14%        | Cholesterol          | 0.13%        | 0.04%        | 0.05%        | 0.01%        |
| sex               | 0.12%       | 0.07%        | 0.04%        | 0.10%        | age_BL               | 0.12%        | 0.06%        | 0.07%        | 0.05%        |
| BMI               | 0.05%       | 0.06%        | 0.13%        | 0.17%        | sex                  | 0.05%        | 0.07%        | 0.10%        | 0.05%        |
| Hypertension      | 0.05%       | 0.02%        | 0.02%        | 0.02%        | apoe4_bi             | 0.03%        | 0.04%        | 0.10%        | 0.11%        |
| Cholesterol       | 0.04%       | 0.00%        | 0.00%        | 0.00%        | Hypertension         | 0.00%        | 0.09%        | 0.07%        | 0.08%        |
| age_BL            | 0.01%       | 0.00%        | 0.00%        | 0.00%        | Diabetes             | 0.00%        | 0.01%        | 0.00%        | 0.01%        |
|                   |             |              |              |              |                      |              |              |              |              |
| <b>VRM Change</b> |             |              |              |              | <b>Speed Change</b>  |              |              |              |              |
| Pred              | BLUP        | PCPheno      | PCGrim       | DunedinPACE  | Pred                 | BLUP         | PCPheno      | PCGrim       | DunedinPACE  |



|              |              |              |             |              |  |              |              |              |              |              |
|--------------|--------------|--------------|-------------|--------------|--|--------------|--------------|--------------|--------------|--------------|
| Education    | 17.90%       | 17.85%       | 17.86%      | 17.85%       |  | <b>AA</b>    | <b>1.64%</b> | <b>1.39%</b> | <b>2.13%</b> | <b>0.17%</b> |
| <b>AA</b>    | <b>1.61%</b> | <b>2.02%</b> | <b>0.8%</b> | <b>0.09%</b> |  | Cholesterol  | 0.33%        | 0.50%        | 0.51%        | 0.41%        |
| CVD          | 0.65%        | 0.63%        | 0.67%       | 0.69%        |  | sex          | 0.21%        | 0.26%        | 0.48%        | 0.15%        |
| Smoking      | 0.41%        | 0.50%        | 0.51%       | 0.38%        |  | Education    | 0.35%        | 0.42%        | 0.42%        | 0.39%        |
| Hypertension | 0.23%        | 0.40%        | 0.38%       | 0.35%        |  | BMI          | 0.14%        | 0.16%        | 0.31%        | 0.19%        |
| Diabetes     | 0.02%        | 0.03%        | 0.02%       | 0.06%        |  | Smoking      | 0.65%        | 0.68%        | 0.18%        | 0.68%        |
| apoe4_bi     | 0.03%        | 0.03%        | 0.07%       | 0.06%        |  | Hypertension | 0.26%        | 0.16%        | 0.17%        | 0.18%        |
| age_BL       | 0.08%        | 0.02%        | 0.03%       | 0.04%        |  | CVD          | 0.19%        | 0.18%        | 0.17%        | 0.21%        |
| BMI          | 0.01%        | 0.02%        | 0.06%       | 0.04%        |  | apoe4_bi     | 0.02%        | 0.02%        | 0.06%        | 0.05%        |
| Cholesterol  | 0.06%        | 0.00%        | 0.01%       | 0.02%        |  | Diabetes     | 0.04%        | 0.07%        | 0.03%        | 0.11%        |
| sex          | 0.02%        | 0.00%        | 0.00%       | 0.06%        |  | age_BL       | 0.00%        | 0.01%        | 0.01%        | 0.01%        |
